# Supplementary material
Source: PubMed Central journal article supplement (PMC8338799)
Supplement: NIHMS1716050-supplement-supinfo.pdf [file NIHMS1716050-supplement-supinfo.pdf]

## Cycloaddition Cascades of Strained Cyclic Alkynes and Oxadiazinones

Melissa Ramirez,<sup>†</sup> Evan R. Darzi,<sup>†</sup> Joyann S. Donaldson, K. N. Houk,\* and Neil K. Garg\*

*Department of Chemistry and Biochemistry, University of California*

*Los Angeles, California 90095, United States*

### Supporting Information – Table of Contents

|                                                                           |             |
|---------------------------------------------------------------------------|-------------|
| <b>Part I: Experimental Section.....</b>                                  | <b>S2</b>   |
| <b>Materials and Methods.....</b>                                         | <b>S2</b>   |
| <b>Experimental Procedures.....</b>                                       | <b>S3</b>   |
| <b>A. Comparison of Reactivities: Benzyne vs. Cyclohexyne.....</b>        | <b>S3</b>   |
| <b>B. One Pot Reaction.....</b>                                           | <b>S4</b>   |
| <b>C. Synthesis of <i>N</i>-Boc Piperidyne Precursor.....</b>             | <b>S5</b>   |
| <b>D. Synthesis of Pyrone Intermediates.....</b>                          | <b>S6</b>   |
| <b>E. Synthesis of Tricyclic Products.....</b>                            | <b>S9</b>   |
| <b>F. Synthesis of Pentacene and Tetracene Precursors.....</b>            | <b>S15</b>  |
| <b>G. Aryne Addition to PAH Scaffold.....</b>                             | <b>S17</b>  |
| <b>NMR Spectra.....</b>                                                   | <b>S19</b>  |
| <sup>1</sup> H NMR Spectra.....                                           | S19         |
| <sup>13</sup> C NMR Spectra.....                                          | S42         |
| <b>Crystallographic Information.....</b>                                  | <b>S63</b>  |
| <br>                                                                      |             |
| <b>Part II: Computational Section.....</b>                                | <b>S65</b>  |
| <b>A. Complete Citation for Gaussian 16.....</b>                          | <b>S65</b>  |
| <b>B. HOMO and LUMO Energies.....</b>                                     | <b>S65</b>  |
| <b>C. Transition State Structures and D/IAS Analysis.....</b>             | <b>S66</b>  |
| DA1.....                                                                  | S66         |
| r-DA1.....                                                                | S69         |
| DA2.....                                                                  | S74         |
| <b>D. Substituent Effects on DA1 and DA2.....</b>                         | <b>S75</b>  |
| <b>E. Free Energy Profiles.....</b>                                       | <b>S78</b>  |
| <b>F. Cartesian Coordinates and Energies of Optimized Structures.....</b> | <b>81</b>   |
| <br>                                                                      |             |
| <b>References.....</b>                                                    | <b>S106</b> |

## Part I: Experimental Section

**Materials and methods.** Unless stated otherwise, reactions were conducted in flame-dried glassware under an atmosphere of nitrogen using anhydrous solvents (passed through activated alumina columns). All commercially available reagents were used as received unless otherwise specified. Cesium fluoride (CsF), 2-(trimethylsilyl)phenyltrifluoromethanesulfonate (**20**), 2*H*-pyran-2-one (**49**), Garg 4,5-indolyne precursor (**60**), and benzyl 4-(trifluoromethylsulfonyloxy)-3-(trimethylsilyl)-5,6-dihydropyridine-1(2*H*)-carboxylate (**61**) were obtained from Sigma–Aldrich. The Sigma–Aldrich product numbers are as follows: 2-(trimethylsilyl)phenyl trifluoromethanesulfonate (**20**): 470430; ; 2*H*-pyran-2-one (**49**): 463159; Garg 4,5-indolyne precursor (**60**): 795569; benzyl 4-(trifluoromethylsulfonyloxy)-3-(trimethylsilyl)-5,6-dihydropyridine-1(2*H*)-carboxylate (**61**): 803928. The TCI product number for 1-(trimethylsilyl)-2-naphthyl trifluoromethanesulfonate (precursor to **59**) is T2465. The Combi-Blocks product number for 3-bromo-4-oxo-piperidine-1-carboxylic acid tert-butyl ester (**52**) is ST-3851. Oxadiazinones **2**,<sup>7</sup> **43**,<sup>7</sup> **44**,<sup>7</sup> **45**,<sup>7</sup> and **46**<sup>7</sup> and silyl triflates **21**,<sup>1</sup> **47**,<sup>2</sup> and **62**<sup>3</sup> are known compounds and were prepared following literature procedures. The <sup>1</sup>H-NMR spectral data matched those reported in the literature. Unless stated otherwise, reactions were performed at room temperature (approximately 23 °C). Thin-layer chromatography (TLC) was conducted with EMD gel 60 F254 pre-coated plates (0.25 mm) and visualized using a combination of UV, anisaldehyde, and potassium permanganate staining. Silicycle silica gel 60 (particle size 0.040–0.063 mm) was used for flash column chromatography. Compound **54** was purified using Yamazen Smart Flash AKROS with ELS detector and Universal columns and compounds **55** and **56** were purified using a Teledyne ISCO CombiFlash® NextGen™ instrument using RediSep Rf high-performance silica gold columns (24 g, catalog No. 692203346, 12 g, catalog No. 692203345). <sup>1</sup>H NMR spectra were recorded on Bruker spectrometers (at 100, 125, 400, and 500 MHz) and are reported relative to deuterated solvent signals. Data for <sup>1</sup>H NMR spectra are reported as follows: chemical shift (δ ppm), multiplicity, coupling constant (Hz), and integration. <sup>13</sup>C NMR spectra are reported in terms of chemical shift (at 125 MHz). High-resolution mass spectra were obtained on Thermo Scientific™ Exactive Mass Spectrometers with DART ID-CUBE. X-ray structures shown in Figure 9 of the manuscript were created using CYLview. IR spectra were obtained on a Perkin-Elmer UATR Two FT-IR spectrometer and are reported in terms of frequency of absorption (cm<sup>-1</sup>

<sup>1</sup>). Uncorrected melting points were measured using a Digimelt MPA160 melting point apparatus. DART-MS spectra were collected on a Thermo Exactive Plus MSD (Thermo Scientific) equipped with an ID-CUBE ion source and a Vapur Interface (IonSense Inc.). Both the source and MSD were controlled by Excalibur software v. 3.0. The analyte was spotted onto OpenSpot sampling cards (IonSense Inc.) using CH<sub>2</sub>Cl<sub>2</sub> as the solvent. Ionization was accomplished using UHP He (Airgas Inc.) plasma with no additional ionization agents. The mass calibration was carried out using Pierce LTQ Velos ESI (+) and (–) Ion calibration solutions (Thermo Fisher Scientific).

## Experimental Procedures

### A. Comparison of Reactivities: Benzyne vs. Cyclohexyne

#### General Procedure A for Comparison of the Reactivities of Benzyne vs. Cyclohexyne (Reaction of Silyl Triflate **29** and Oxadiazinone **2** is used as an example, Figure S1, Entry 6).

To a stirred solution of silyl triflate **21** (22.5 mg, 0.0744 mmol, 1.0 equiv) and oxadiazinone **2** (37.5 mg, 0.15 mmol, 2.0 equiv) in MeCN (1.5 mL, 0.1 M) was added CsF (56.5 mg, 0.372 mmol, 5.0 equiv). The reaction was purged with nitrogen for ten minutes before being sealed with a Teflon cap and left to stir at 23 °C. After 14 h, the reaction mixture was filtered through celite (monster pipette, 4 cm tall) with EtOAc (10 mL) as the eluent and then concentrated under reduced pressure. 75% yield of pyrone **29** and 4% yield of tricycle **35** were obtained as determined using <sup>1</sup>H NMR analysis with 1,3,5-trimethoxybenzene as an external standard. See pages S7 and S10 for the tabulated <sup>1</sup>H NMR data of pyrone **29** and tricycle **35**, respectively). Spectral data for tricycle **35**<sup>4</sup> match those previously reported. Purification of the crude material via flash chromatography (Isco 4g gold, 0 → 100% EtOAc) afforded pyrone **29** (75% yield) as a yellow solid. Pyrone **29**: R<sub>f</sub> 0.32, (9:1 hexanes:EtOAc); <sup>1</sup>H-NMR (400 MHz, CD<sub>3</sub>Cl): 7.62–7.59 (m, 2H), 7.48–7.42 (m, 5H), 7.38–7.34 (m, 1H), 7.30–7.27 (m, 2H), 2.68–2.65 (t, 2H), 2.53–2.49 (t, 2H), 1.68–1.64 (m, 4H). The spectral data matched those previously reported in the literature.<sup>4</sup>

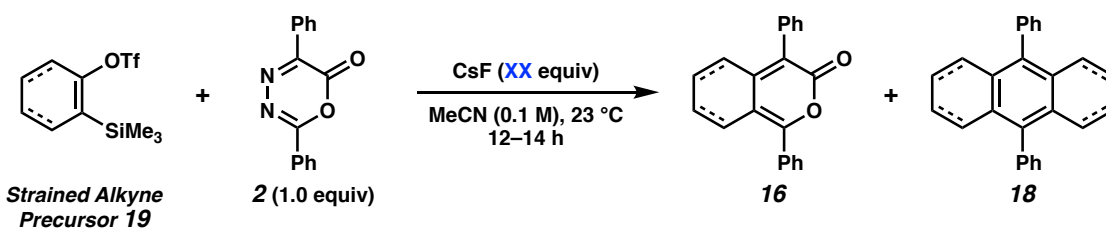

| Entry | Strained Alkyne Precursor | Equivs of Silyl Triflate | Equivs of CsF | Yield of 16 | Yield of 18 |     |
|-------|---------------------------|--------------------------|---------------|-------------|-------------|-----|
| 1     | <br>20                    | }                        | 2             | 10          | 0%          | 33% |
| 2     |                           |                          | 1             | 5           | 0%          | 28% |
| 3     |                           |                          | 0.5           | 2.5         | 0%          | 33% |
| 4     | <br>21                    | }                        | 2             | 10          | 4%          | 25% |
| 5     |                           |                          | 1             | 5           | 34%         | 20% |
| 6     |                           |                          | 0.5           | 2.5         | 75%         | 4%  |

**Figure S1.** Comparison of the reactivities of benzyne (derived from **20**) and cyclohexyne (derived from **21**) with oxadiazinone **2**. Yields determined using  $^1\text{H}$  NMR analysis with 1,3,5-trimethoxybenzene as an external standard.

## B. One Pot Reaction

### Procedure for One Pot Reaction of Silyl Triflates

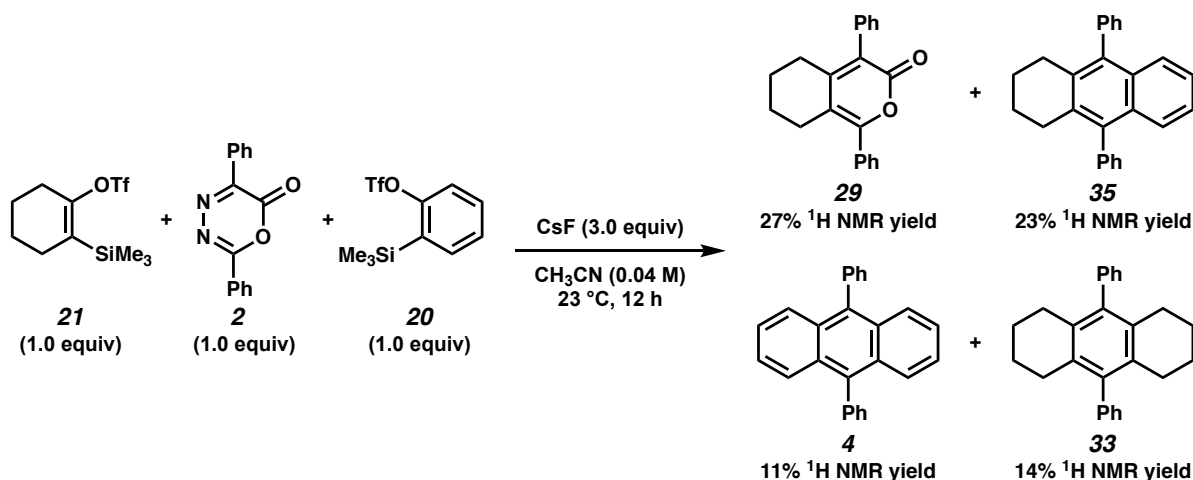

To a stirred solution of silyl triflate **21** (25.0 mg, 0.0827 mmol, 1.0 equiv), oxadiazinone **2** (20.7 mg, 0.0827 mmol, 1.0 equiv), and silyl triflate **20** (24.7 mg, 0.0827 mmol, 1.0 equiv), in MeCN (2.1 mL, 0.04 M) was added CsF (37.7 mg, 0.248 mmol, 3.0 equiv). The reaction was purged with

nitrogen for ten minutes before being sealed with a Teflon cap and left to stir at 23 °C. After 12 h, the reaction mixture was filtered through celite (monster pipette, 4 cm tall) with EtOAc (10 mL) as the eluent and then concentrated under reduced pressure. Yields of pyrone **29**, tricycle **35**, 9,10-diphenylanthracene (**4**), and tricycle **33** were determined using <sup>1</sup>H NMR analysis with 1,3,5-trimethoxybenzene as an external standard. See pages S7, S11, and S10 for the tabulated <sup>1</sup>H NMR data of pyrone **29**, tricycle **33**, and tricycle **35**, respectively. Spectral data for pyrone **29**, tricycles **35**,<sup>4</sup> and **33**,<sup>4</sup> and 1,9-diphenylanthracene (**4**)<sup>5</sup> match those previously reported.

### C. Synthesis of *N*-Boc Piperidyne Precursor

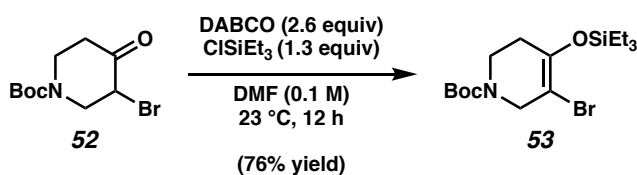

**Bromo silyl enol ether 53.** A heterogenous solution of known bromoketone **52** (900 mg, 3.24 mmol, 1.0 equiv) in DMF (11.0 mL, 0.1 M) was sonicated until all solids dissolved. To the solution was added SiEt<sub>3</sub>Cl (780 mg, 5.18 mmol, 1.3 equiv) dropwise at 23 °C. Next, DABCO (835 mg, 7.44 mmol, 2.30 equiv) was added to the reaction. The resulting mixture was allowed to stir at 23 °C. After 12 h, the reaction mixture was quenched with sat. NaHCO<sub>3</sub> (1 mL) and water (4 mL) and extracted with Et<sub>2</sub>O (3 x 4 mL). The combined organic layers were washed with water (1 x 15 mL) and brine (1 x 15 mL), dried with sodium sulfate, filtered, and concentrated under reduced pressure to provide the crude reaction mixture. Purification of the crude material via flash chromatography (100:1 hexanes:EtOAc → 40:1 hexanes:EtOAc) afforded silyl enol ether **53** (76% isolated yield) as a clear oil. Bromo silyl enol ether **53**: R<sub>f</sub> 0.67 (5:1 hexanes:EtOAc); <sup>1</sup>H-NMR (600 MHz, CDCl<sub>3</sub>): δ 4.07 (br s, 2H), 3.57 (br s, 2H), 2.28 (br s, 2H), 1.46 (s, 9H), 1.00 (t, *J* = 7.9, 9H), 0.71 (q, *J* = 7.9, 6H). The spectral data matched those previously reported in the literature.<sup>6</sup>

*Note: Bromo silyl enol ether 53 was obtained as a mixture of rotamers. These data represent empirically observed chemical shifts from the <sup>1</sup>H NMR spectrum.*

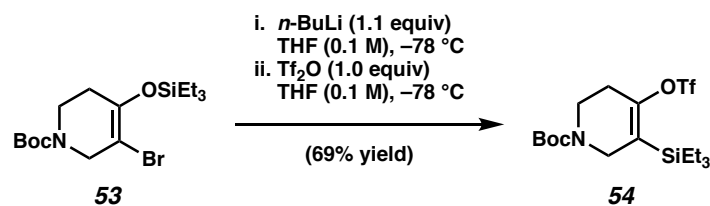

**Silyl triflate 54.** A solution of silyl enol ether **53** (470 mg, 1.20 mmol, 1.0 equiv) in THF (12.0 mL) was cooled to  $-78\text{ }^{\circ}\text{C}$ . To the solution was added *n*-BuLi (0.575 mL, 1.32 mmol, 1.10 equiv, 2.29 M) dropwise at  $-78\text{ }^{\circ}\text{C}$  over 30 min. The resulting mixture was stirred at  $-78\text{ }^{\circ}\text{C}$  for 1.5 h. Next,  $\text{Tf}_2\text{O}$  (0.202 mL, 0.100 mmol, 1.00 equiv) was added dropwise at  $-78\text{ }^{\circ}\text{C}$  over 20 minutes. After stirring for 12 h at  $-78\text{ }^{\circ}\text{C}$ , the reaction was quenched with sat.  $\text{NaHCO}_3$  (1 mL) and allowed to warm to room temperature. After 1 h, the reaction was diluted with water (15 mL) and extracted with  $\text{Et}_2\text{O}$  (3 x 15 mL). The combined organic layers were washed with water (15 mL) and brine (15 mL), dried with sodium sulfate, and concentrated under reduced pressure to provide the crude reaction mixture. Purification of the crude material via flash chromatography (Yamazen, 8g  $\text{SiO}_2$ , 9:1 hexanes:EtOAc) afforded silyl triflate **54** (69% isolated yield) as a clear oil. Silyl triflate **54**:  $R_f$  0.44 (9:1 hexanes:EtOAc);  $^1\text{H-NMR}$  (500 MHz,  $\text{CDCl}_3$ ):  $\delta$  4.01 (br s, 2H), 3.57 (m, 2H), 2.53 (m, 2H), 1.46 (s, 9H), 0.97–0.94 (t,  $J = 7.7$ , 9H), 0.77–0.72 (q,  $J = 7.9$ , 6H);  $^{13}\text{C-NMR}$  (125 MHz,  $\text{CDCl}_3$ ): 154.3, 124.2, 122.1, 119.6, 117.1, 114.5, 80.5, 45.7, 45.3, 40.9, 40.2, 28.4, 7.36, 6.77, 6.74, 5.60, 5.10, 2.83; IR (film): 2957, 2884, 1699, 1413, 1264  $\text{cm}^{-1}$ ; HRMS-APCI ( $m/z$ ) [ $\text{M} + \text{H}$ ] $^+$  calcd for  $\text{C}_{17}\text{H}_{30}\text{F}_3\text{NO}_5\text{SSi}^+$ , 446.16388; found 446.16418.

*Note: Silyl triflate 54 was obtained as a mixture of rotamers. These data represent empirically observed chemical shifts from the  $^1\text{H}$  and  $^{13}\text{C}$  NMR spectrum.*

**D. Synthesis of Pyrone Intermediates****General Procedure B (Preparation of pyrone **55** is used as an example).**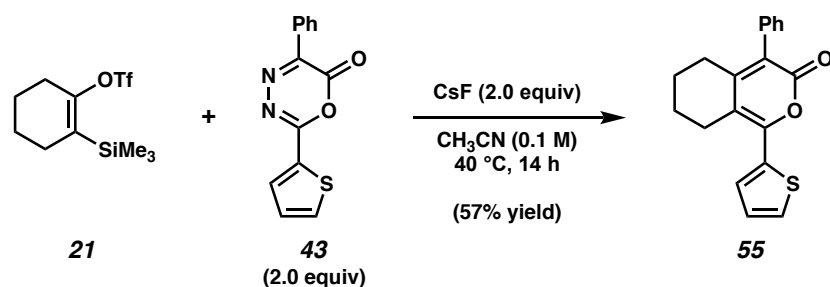

**Pyrone 55.** To a stirred solution of silyl triflate **21** (45.4 mg, 0.150 mmol, 1.0 equiv) and oxadiazinone **43** (76.9 mg, 0.300 mmol, 2.0 equiv) in MeCN (1.5 mL, 0.1 M) was added CsF (45.6 mg, 0.300 mmol, 2.0 equiv). The reaction was purged with nitrogen for ten minutes before being sealed with a Teflon cap and left to stir at 40 °C. After 14 h, the reaction mixture was filtered through celite (monster pipette, 4 cm tall) with EtOAc (10 mL) as the eluent and then concentrated under reduced pressure. Purification of the crude material via flash chromatography (Isco 4g gold, 0 → 100% EtOAc) afforded pyrone **55** (57% yield, average of two experiments) as a yellow solid. Pyrone **55**: mp 100–104 °C,  $R_f$  0.33 (5:2 hexanes:EtOAc);  $^1\text{H-NMR}$  (500 MHz,  $\text{CDCl}_3$ ):  $\delta$  7.66–7.64 (dd,  $J = 3.9, 1.1$ , 1H),  $\delta$  7.53–7.52 (dd,  $J = 5.1, 1.2$ , 1H),  $\delta$  7.45–7.41 (m, 2H),  $\delta$  7.37–7.33 (m, 1H),  $\delta$  7.27–7.26 (m, 1H),  $\delta$  7.25–7.24 (m, 1H),  $\delta$  7.27–7.26 (m, 1H),  $\delta$  2.83–2.80 (t,  $J = 6.6$ , 2H),  $\delta$  2.50–2.46 (t,  $J = 6.5$ , 2H),  $\delta$  1.82–1.76 (m, 2H),  $\delta$  1.67–1.61 (m, 2H);  $^{13}\text{C-NMR}$  (100 MHz,  $\text{CDCl}_3$ ): 161.3, 153.8, 150.6, 135.0, 134.6, 129.9, 129.4, 129.0, 128.7, 128.1, 127.6, 124.0, 113.0, 29.5, 26.0, 22.4, 21.7; IR (film): 3623, 3546, 1702, 1524, 1443  $\text{cm}^{-1}$ ; HRMS–APCI ( $m/z$ ) [ $\text{M} + \text{H}$ ] $^+$  calcd for  $\text{C}_{19}\text{H}_{17}\text{O}_2\text{S}^+$ , 309.0944; found, 309.0916.

*Any modification of the conditions shown in the representative procedure above are specified in the corresponding reaction scheme.*

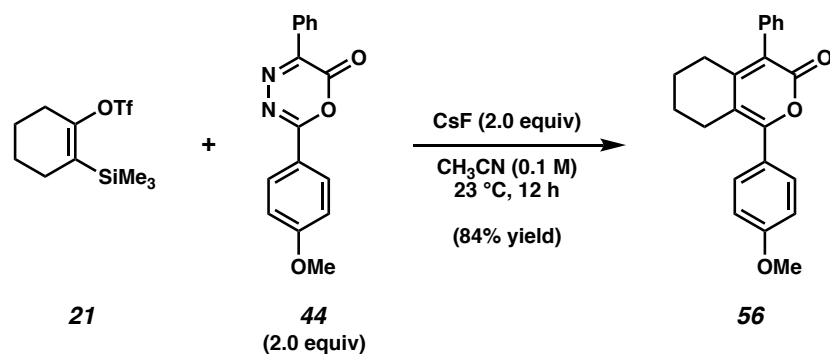

**Pyrone 56.** Followed General Procedure B using silyl triflate **21** (45 mg, 150  $\mu\text{mol}$ , 1.0 equiv) afforded, after purification via flash chromatography (Isco 4g gold, 0  $\rightarrow$  100% EtOAc), pyrone **56** (84% yield, average of two experiments) as a light yellow solid. Pyrone **56**: mp 146–150  $^\circ\text{C}$ ,  $R_f$  0.24 (5:2 hexanes:EtOAc);  $^1\text{H-NMR}$  (500 MHz,  $\text{CDCl}_3$ ):  $\delta$  7.59–7.55 (m, 2H),  $\delta$  7.45–7.41 (m, 2H),  $\delta$  7.37–7.33 (m, 1H),  $\delta$  7.29–7.25 (m, 2H),  $\delta$  6.98–6.94 (d,  $J = 8.9$  2H),  $\delta$  3.86 (s, 3H),  $\delta$  2.68–2.65 (m, 2H),  $\delta$  2.51–2.47 (m, 2H),  $\delta$  1.67–1.64 (m, 4H);  $^{13}\text{C-NMR}$  (100 MHz,  $\text{CDCl}_3$ ): 158.6, 140.3, 137.7, 137.5, 134.1, 133.7, 132.3, 131.6, 131.36, 131.33, 130.3, 128.6, 127.0, 126.2, 126.1, 124.7, 114.0, 55.4, 29.6, 29.5, 23.2, 23.1; IR (film): 1700, 1607, 1507, 1264, 1177  $\text{cm}^{-1}$ ; HRMS-APCI (m/z)  $[\text{M} + \text{H}]^+$  calcd for  $\text{C}_{22}\text{H}_{21}\text{O}_3^+$ , 333.1485; found 333.1456.

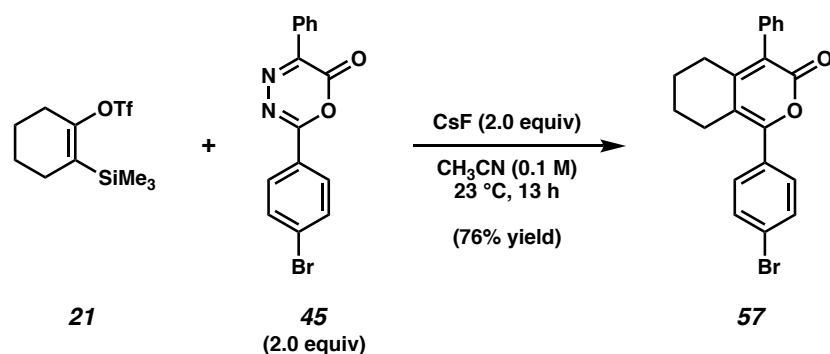

**Pyrone 57.** Followed General Procedure B using silyl triflate **21** (45 mg, 149  $\mu\text{mol}$ , 1.0 equiv) afforded, after purification via flash chromatography (2:1 hexanes:EtOAc), pyrone **57** (76% yield, average of two experiments) as a light yellow solid. Pyrone **57**: mp 155–157  $^\circ\text{C}$ ,  $R_f$  0.72 (5:2 hexanes:EtOAc);  $^1\text{H-NMR}$  (500 MHz,  $\text{CDCl}_3$ ):  $\delta$  7.60–7.58 (m, 2H),  $\delta$  7.50–7.42 (m, 4H),  $\delta$  7.38–7.34 (m, 1H),  $\delta$  7.28–7.26 (m, 2H),  $\delta$  2.65–2.62 (m, 2H),  $\delta$  2.52–2.49 (m, 2H),  $\delta$  1.68–1.64 (m, 4H);  $^{13}\text{C-NMR}$  (100 MHz,  $\text{CDCl}_3$ ): 161.0, 154.1, 153.9, 134.3, 131.6, 131.5, 130.6, 129.7, 128.7,



128.1, 124.6, 124.2, 114.7, 28.5, 25.5, 22.0, 21.4; IR (film): 3058, 2939, 2864, 2246, 1698  $\text{cm}^{-1}$ ; HRMS-APCI (m/z)  $[\text{M} + \text{H}]^+$  calcd for  $\text{C}_{21}\text{H}_{18}\text{BrO}_2^+$ , 381.0452; found 381.0485.

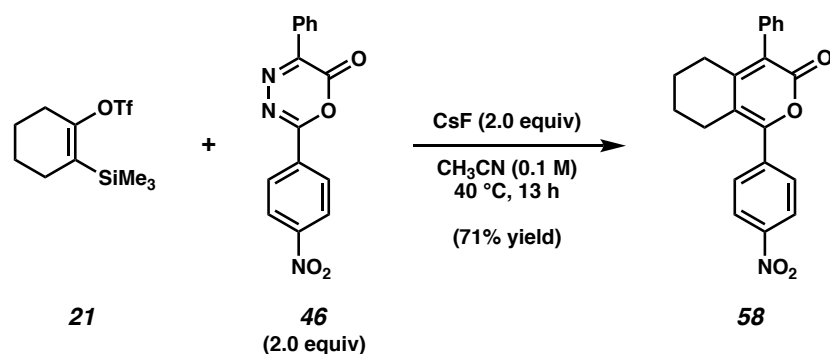

**Pyrone 58.** Followed General Procedure B using silyl triflate **21** (45 mg, 149  $\mu\text{mol}$ , 1.0 equiv) afforded, after purification via flash chromatography (2:1 hexanes:EtOAc), pyrone **58** (71% yield, average of two experiments) as a yellow foam. Pyrone **58**:  $R_f$  0.26 (5:2 hexanes:EtOAc);  $^1\text{H-NMR}$  (500 MHz,  $\text{CDCl}_3$ ):  $\delta$  8.33–8.31 (d, 2H),  $\delta$  7.82–7.80 (m, 2H),  $\delta$  7.47–7.44 (m, 2H),  $\delta$  7.40–7.37 (m, 1H), 7.29–7.27 (m, 2H),  $\delta$  2.69–2.67 (t,  $J = 6.6$ , 2H),  $\delta$  2.55–2.53 (t,  $J = 6.7$ , 2H),  $\delta$  1.70–1.69 (m, 4H);  $^{13}\text{C-NMR}$  (125 MHz,  $\text{CDCl}_3$ ): 161.5, 153.6, 152.4, 148.1, 138.5, 133.9, 130.1, 129.6, 128.7, 128.3, 125.7, 123.6, 116.2, 28.5, 25.5, 21.8, 21.3; IR (film): 3063, 2939, 2865, 1705, 1520  $\text{cm}^{-1}$ ; HRMS-APCI (m/z)  $[\text{M} + \text{H}]^+$  calcd for  $\text{C}_{21}\text{H}_{18}\text{NO}_4^+$ , 348.1230; found 348.1200.

## E. Synthesis of Tricyclic Products

**General Procedure C (Preparation of cycloadduct 35 is used as an example).**

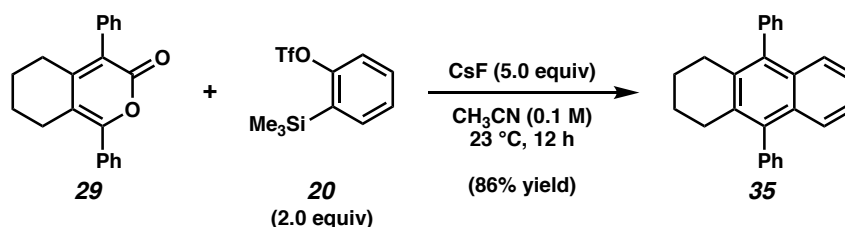

**Cycloadduct 35.** To a stirred solution of pyrone **29** (30 mg, 99.2  $\mu\text{mol}$ , 1.0 equiv) and silyl triflate **20** (59.2 mg, 0.20 mmol, 2.0 equiv) in MeCN (1.0 mL, 0.1 M) was added CsF (75 mg, 0.50 mmol, 5.0 equiv). The reaction was purged with nitrogen for ten minutes before being sealed with a Teflon cap and left to stir at 23  $^\circ\text{C}$ . After 12 h, the reaction mixture was filtered through celite (monster pipette, 4 cm tall) with EtOAc (10 mL) as the eluent and then concentrated under reduced pressure.

Purification of the crude material via flash chromatography (100:1 hexanes:Et<sub>2</sub>O) afforded cycloadduct **35** (86% yield, average of two experiments) as a white solid. Cycloadduct **35**: mp > 260 °C, R<sub>f</sub> 0.59 (20:1 hexanes:EtOAc); <sup>1</sup>H-NMR (500 MHz, CDCl<sub>3</sub>): δ 7.53 (t, *J* = 7.5, 4H), 7.46–7.43 (m, 2H), 7.35–7.31 (m, 6H), 7.24–7.22 (q, *J* = 3.3, 2H), 2.63 (s, 4H), 1.71 (s, 4H); <sup>13</sup>C-NMR (125 MHz, CDCl<sub>3</sub>): 140.3, 137.8, 133.7, 131.3, 130.3, 128.6, 127.0, 126.1, 124.7, 29.5, 23.1. The spectral data matched those previously reported in the literature.<sup>4</sup>

Any modification of the conditions shown in the representative procedure above are specified in the following scheme

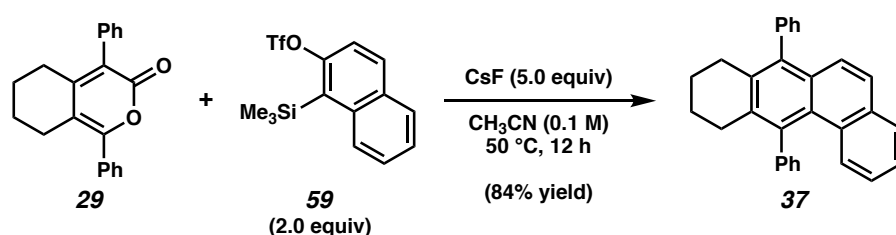

**Cycloadduct 37.** Followed General Procedure C using pyrone **29** (50 mg, 0.165 mmol, 1.0 equiv) afforded, after purification via flash chromatography (100:1 hexanes:Et<sub>2</sub>O), cycloadduct **37** (84% yield, average of two experiments) as a white solid. Cycloadduct **37**: mp 189–193 °C, R<sub>f</sub> 0.47 (20:1 hexanes:Et<sub>2</sub>O); <sup>1</sup>H-NMR (500 MHz, CDCl<sub>3</sub>): δ 7.71–7.69 (dd, *J* = 8.0, 1.4, 1H), 7.56–7.52 (m, 4H), 7.35–7.29 (m, 6H), 7.01–6.98 (m, 1H); <sup>13</sup>C-NMR (125 MHz, CDCl<sub>3</sub>): 144.1, 140.8, 139.1, 138.5, 135.4, 134.3, 133.1, 130.7, 130.3, 130.2, 129.9, 129.4, 128.6, 128.24, 128.23, 127.1, 127.0, 126.9, 126.3, 125.35, 125.33, 124.8, 30.1, 29.7, 23.3, 22.8; IR (film): 3055, 3025, 2931, 2856, 1441 cm<sup>-1</sup>; HRMS-APCI (*m/z*) [M + H]<sup>+</sup> calcd for C<sub>30</sub>H<sub>24</sub><sup>+</sup>, 385.19508; found 385.19522.

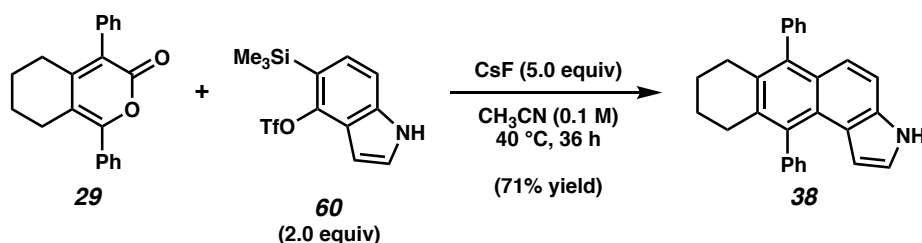

**Cycloadduct 38.** Followed General Procedure C using pyrone **29** (40 mg, 0.132 mmol, 1.0 equiv) afforded, after purification via flash chromatography (100% hexanes → 5:1 hexanes:Et<sub>2</sub>O),

cycloadduct **38** (71% yield, average of two experiments) as a light yellow solid. Cycloadduct **38**: mp >260 °C,  $R_f$  0.60 (5:2 hexanes:EtOAc);  $^1\text{H-NMR}$  (500 MHz,  $\text{CD}_3\text{Cl}$ ):  $\delta$  8.22 (s, 1H), 7.58–7.51 (m, 5H), 7.46–7.43 (m, 1H), 7.40–7.39 (d,  $J = 7.0$ , 2H), 7.34–7.33 (d,  $J = 7.0$ , 2H), 7.28–7.27 (d,  $J = 9.2$ , 1H), 7.14–7.12 (d,  $J = 9.2$ , 1H), 6.84–6.83 (m, 1H);  $^{13}\text{C-NMR}$  (125 MHz,  $\text{CDCl}_3$ ): 143.3, 141.6, 138.8, 136.8, 133.8, 132.8, 130.7, 130.4, 130.2, 129.2, 128.5, 127.4, 127.1, 126.7, 125.7, 121.9, 121.7, 120.5, 111.9, 105.7, 29.5, 23.4, 23.3; IR (film): 2991, 1421, 1264, 895, 731  $\text{cm}^{-1}$ ; HRMS-APCI (m/z)  $[\text{M} + \text{H}]^+$  calcd for  $\text{C}_{28}\text{H}_{23}\text{N}^+$ , 374.19033; found 374.19000.

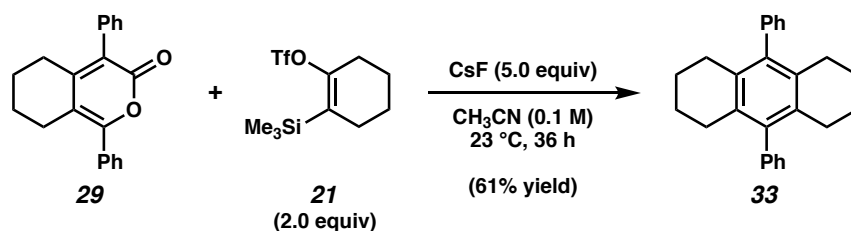

**Cycloadduct 33.** Followed General Procedure C using pyrone **29** (40 mg, 0.132 mmol, 1.0 equiv) afforded, after purification via flash chromatography (100:1 hexanes: $\text{CH}_2\text{Cl}_2$ ), cycloadduct **33** (61% yield, average of two experiments) as a white solid. Cycloadduct **33**:  $R_f$  0.32, (9:1 hexanes:EtOAc);  $^1\text{H-NMR}$  (400 MHz,  $\text{CDCl}_3$ ): 7.62–7.59 (m, 2H), 7.48–7.42 (m, 5H), 7.38–7.34 (m, 1H), 7.30–7.27 (m, 2H), 2.68–2.65 (m, 2H), 2.53–2.49 (m, 2H), 1.68–1.64 (m, 4H);  $^{13}\text{C-NMR}$  (100 MHz,  $\text{CDCl}_3$ ): 162.2, 155.4, 154.0, 134.5, 132.7, 129.8, 129.7, 129.1, 128.7, 128.3, 128.0, 124.2, 114.3, 28.5, 25.4, 22.1, 21.5. The spectral data matched those previously reported in the literature.<sup>4</sup>

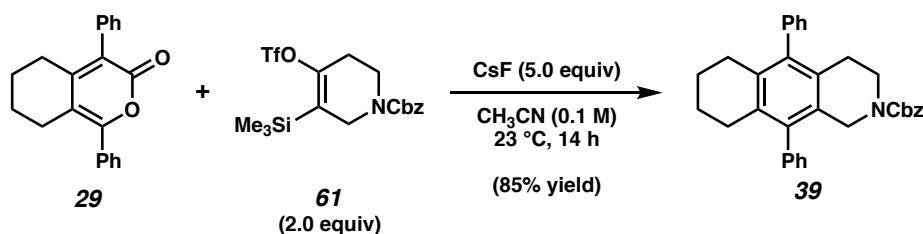

**Cycloadduct 39.** Followed General Procedure C using pyrone **29** (40 mg, 0.132 mmol, 1.0 equiv) afforded, after purification via flash chromatography (100% hexanes  $\rightarrow$  9:1 hexanes:EtOAc), cycloadduct **39** (85% yield, average of two experiments) as a yellow foam. Cycloadduct **39**:  $R_f$  0.60 (5:2 hexanes:EtOAc);  $^1\text{H-NMR}$  (500 MHz,  $\text{CDCl}_3$ ):  $\delta$  7.45–7.42 (m, 4H), 7.36–7.29 (m, 6H),

7.19–7.16 (m, 5H), 5.05 (s, 1H), 4.23 (s, 2H), 3.53–3.51 (t,  $J = 6.0$ , 2 H), 2.46–2.43 (m, 2H), 2.36 (s, 4H), 1.60 (s, 4H). Spectral data matched those previously reported for tricycle **39**.<sup>7</sup>

*Note: Cycloadduct 39 was obtained as a mixture of rotamers. This data represent empirically observed chemical shifts from the <sup>1</sup>H NMR spectra.*

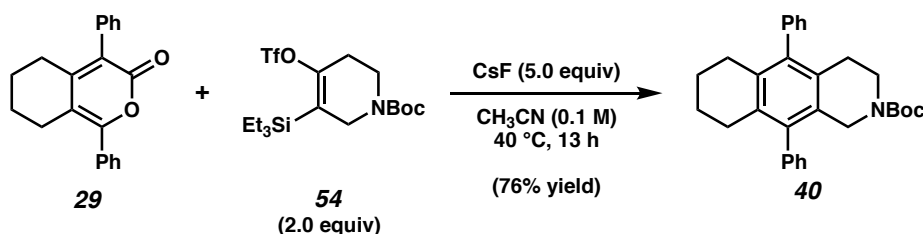

**Cycloadduct 40.** Followed General Procedure C using pyrone **29** (40 mg, 0.132 mmol, 1.0 equiv) afforded, after purification via flash chromatography (100% PhH), cycloadduct **40** (76% yield, average of two experiments) as a white foam. Cycloadduct **40**:  $R_f$  0.86 (5:2 hexanes:EtOAc); <sup>1</sup>H-NMR (500 MHz, CDCl<sub>3</sub>):  $\delta$  7.45 (t, 4H), 7.36–7.34 (m, 2H), 7.20–7.17 (m, 4H), 4.14 (s, 1H), 3.46 (t,  $J = 7.4$ , 2H), 2.37–2.44 (m, 6H), 1.61 (s, 3H), 1.36 (s, 9H); <sup>13</sup>C-NMR (125 MHz, CDCl<sub>3</sub>): 154.6, 140.6, 139.5, 133.2, 129.2, 128.9, 128.6, 127.0, 126.7, 79.3, 44.9, 41.7, 40.8, 28.9, 28.6, 28.4, 23.06, 23.03; IR (film): 2971, 2930, 1738, 1697, 1365, 1216, 1168, 702 cm<sup>-1</sup>; HRMS-APCI ( $m/z$ ) [ $M + H$ ]<sup>+</sup> calcd for C<sub>30</sub>H<sub>33</sub>NO<sub>2</sub><sup>+</sup>, 440.2584; found 440.2585.

*Note: Cycloadduct 40 was obtained as a mixture of rotamers. These data represent empirically observed chemical shifts from the <sup>1</sup>H NMR and <sup>13</sup>C NMR spectra.*

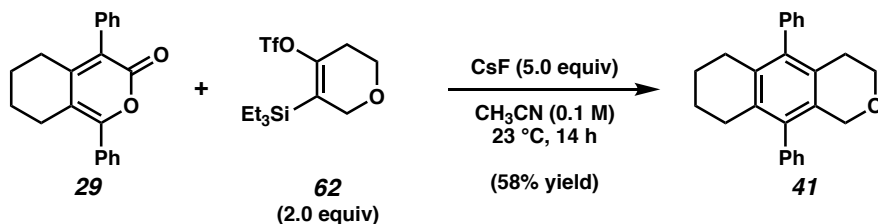

**Cycloadduct 41.** Followed General Procedure C using pyrone **29** (40 mg, 0.132 mmol, 1.0 equiv) afforded, after purification via flash chromatography (100% PhH), cycloadduct **41** (58% yield, average of two experiments) as a white foam. Cycloadduct **41**: mp >260 °C,  $R_f$  0.75 (5:2 hexanes:EtOAc); <sup>1</sup>H-NMR (500 MHz, CDCl<sub>3</sub>):  $\delta$  7.46–7.42 (m, 4H), 7.37–7.34 (m, 2H), 7.21–

7.17 (m, 4H), 4.35 (s, 2H), 3.78 (t,  $J = 5.7$ , 2H), 2.41 (t,  $J = 5.7$ , 2H), 2.37–2.34 (m, 4H), 1.63–1.60 (m, 4H);  $^{13}\text{C}$ -NMR (125 MHz,  $\text{CDCl}_3$ ): 140.9, 140.4, 139.2, 137.9, 133.5, 133.0, 130.0, 129.0, 128.8, 128.7, 127.1, 126.8, 67.6, 65.4, 28.9, 28.5, 27.8; IR (film): 3058, 2931, 2857, 1441, 1119  $\text{cm}^{-1}$ ; HRMS-APCI ( $m/z$ ) [ $\text{M} + \text{H}$ ] $^+$  calcd for  $\text{C}_{25}\text{H}_{24}\text{O}^+$ , 341.1899; found 341.1894.

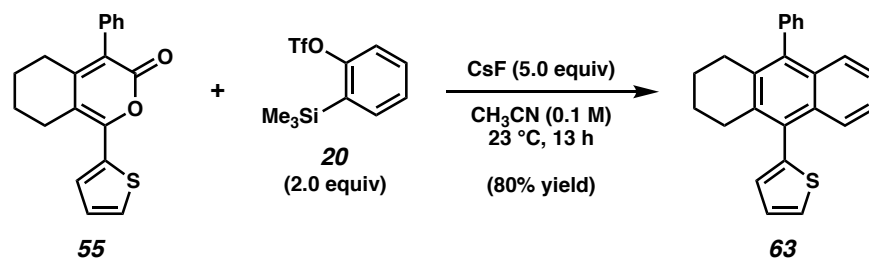

**Cycloadduct 63.** Followed General Procedure C using pyrone **55** (20 mg, 64.9  $\mu\text{mol}$ , 1.0 equiv) afforded, after purification via flash chromatography (4:1 hexanes:EtOAc), cycloadduct **63** (80% yield, average of two experiments) as a light yellow solid. Cycloadduct **63**: mp 196–198  $^\circ\text{C}$ ,  $R_f$  0.66 (5:2 hexanes:EtOAc);  $^1\text{H}$ -NMR (500 MHz,  $\text{CDCl}_3$ ):  $\delta$  7.55–7.50 (m, 4H),  $\delta$  7.46–7.43 (m, 1H),  $\delta$  7.33–7.28 (m, 4H),  $\delta$  7.24–7.22 (m, 2H),  $\delta$  2.79–2.76 (m, 2H),  $\delta$  2.62–2.59 (m, 2H),  $\delta$  1.75–1.72 (m, 4H);  $^{13}\text{C}$ -NMR (125 MHz,  $\text{CDCl}_3$ ): 140.5, 140.0, 139.1, 136.6, 133.7, 132.6, 131.2, 130.1, 129.8, 128.6, 127.9, 127.3, 127.1, 126.1, 126.0, 125.8, 125.1, 124.9, 29.4, 29.3, 23.1, 23.0; IR (film): 2936, 1426, 1264, 895, 731  $\text{cm}^{-1}$ ; HRMS-APCI ( $m/z$ ) [ $\text{M} + \text{H}$ ] $^+$  calcd for  $\text{C}_{24}\text{H}_{20}\text{S}^+$ , 341.13585; found 341.13387.

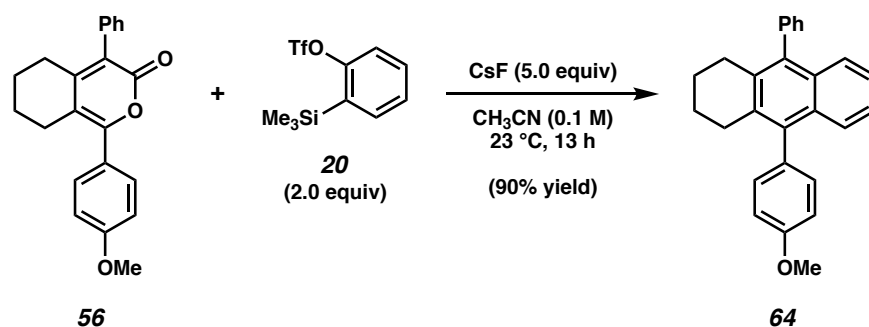

**Cycloadduct 64.** Followed General Procedure C using pyrone **56** (20 mg, 60.0  $\mu\text{mol}$ , 1.0 equiv) afforded, after purification via flash chromatography (100% hexanes  $\rightarrow$  24:1 hexanes:EtOAc), cycloadduct **64** (90% yield, average of two experiments) as a white solid. Cycloadduct **64**: mp 200–204  $^\circ\text{C}$ ,  $R_f$  0.68 (5:2 hexanes:EtOAc);  $^1\text{H}$ -NMR (500 MHz,  $\text{CDCl}_3$ ):  $\delta$  7.54–7.50 (m, 2H),  $\delta$  7.46–7.41 (m, 1H),  $\delta$  7.40–7.37 (m, 1H),  $\delta$  7.34–7.29 (m, 3H),  $\delta$  7.23–7.21 (m, 4H),  $\delta$  7.08–7.04

(m, 2H),  $\delta$  3.91 (s, 3H),  $\delta$  2.64–2.61 (m, 4H),  $\delta$  1.72–1.69 (m, 4H);  $^{13}\text{C}$ -NMR (125 MHz,  $\text{CDCl}_3$ ): 158.6, 140.3, 137.7, 137.5, 134.1, 133.7, 132.3, 131.6, 131.4, 131.3, 130.3, 128.6, 127.0, 126.2, 126.1, 124.7, 114.0, 55.4, 29.6, 29.5, 23.2, 23.1; IR (film): 2933, 1610, 1516, 1264, 1243  $\text{cm}^{-1}$ ; HRMS-APCI (m/z)  $[\text{M} + \text{H}]^+$  calcd for  $\text{C}_{27}\text{H}_{24}\text{O}^+$ , 365.18999; found 365.18820.

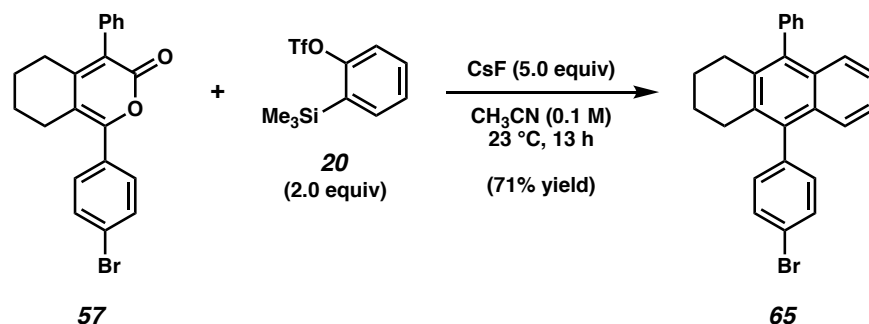

**Cycloadduct 65.** Followed General Procedure C using pyrone **57** (20 mg, 54.3  $\mu\text{mol}$ , 1.0 equiv) afforded, after purification via flash chromatography (Biotage 10g  $\text{SiO}_2$ , 7%  $\rightarrow$  58% EtOAc in hexanes, cycloadduct **65** (71% yield, average of two experiments) as a white solid. Cycloadduct **65**: mp 196–199  $^\circ\text{C}$ ,  $R_f$  0.72 (5:2 hexanes:EtOAc);  $^1\text{H}$ -NMR (500 MHz,  $\text{CDCl}_3$ ):  $\delta$  7.66–7.65 (d,  $J = 8.2$ , 2H),  $\delta$  7.53–7.50 (m, 2H),  $\delta$  7.46–7.43 (m, 1H),  $\delta$  7.36–7.29 (m, 4H),  $\delta$  7.25–7.23 (m, 2H),  $\delta$  7.20–7.18 (d,  $J = 8.2$ , 2H),  $\delta$  2.61–2.60 (m, 4H),  $\delta$  1.71 (m, 4H);  $^{13}\text{C}$ -NMR (125 MHz,  $\text{CDCl}_3$ ): 140.0, 139.1, 138.0, 136.3, 133.6, 132.0, 131.7, 131.1, 130.9, 130.1, 128.5, 126.9, 126.1, 125.6, 124.8, 124.7, 121.1, 29.4, 29.3, 22.9; IR (film): 1411, 1265, 862, 730, 701  $\text{cm}^{-1}$ ; HRMS-APCI (m/z)  $[\text{M} + \text{H}]^+$  calcd for  $\text{C}_{26}\text{H}_{21}\text{Br}^+$ , 413.08994; found 413.08276.

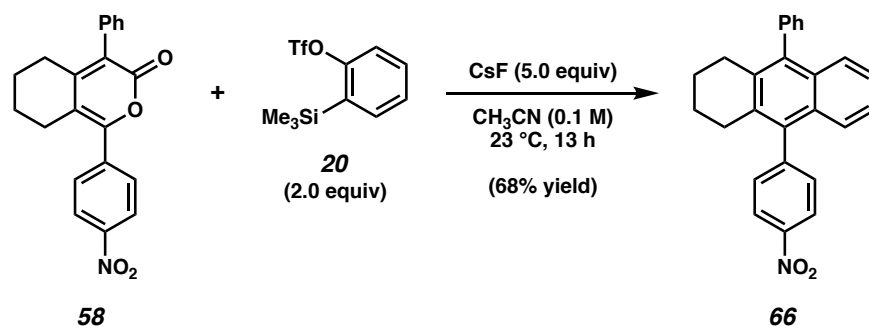

**Cycloadduct 66.** Followed General Procedure C using pyrone **58** (15 mg, 44.0  $\mu\text{mol}$ , 1.0 equiv) afforded, after purification via flash chromatography (2:1 hexanes:EtOAc), cycloadduct **66** (68% yield, average of two experiments) as a light yellow solid. Cycloadduct **66**: mp 258–260  $^\circ\text{C}$ ,  $R_f$

0.35 (5:2 hexanes:EtOAc);  $^1\text{H-NMR}$  (500 MHz,  $\text{CDCl}_3$ ):  $\delta$  8.41–8.39 (d,  $J$  = 8.9, 2H),  $\delta$  7.55–7.50 (m, 4H),  $\delta$  7.47–7.44 (m, 1H),  $\delta$  7.37–7.34 (m, 1H),  $\delta$  7.30–7.24 (m, 4H),  $\delta$  7.19–7.17 (m, 1H),  $\delta$  2.63–2.61 (m, 2H),  $\delta$  2.56–2.55 (m, 2H),  $\delta$  1.73–1.70 (m, 4H);  $^{13}\text{C-NMR}$  (125 MHz,  $\text{CDCl}_3$ ): 140.5, 140.0, 139.1, 136.6, 133.7, 132.6, 131.2, 130.1, 129.8, 128.6, 127.9, 127.3, 127.1, 126.1, 126.0, 125.8, 125.1, 124.9, 29.4, 29.3, 23.1, 23.0; IR (film): 1391, 1264, 862, 731, 704  $\text{cm}^{-1}$ ; HRMS-APCI ( $m/z$ ) [ $M + H$ ] $^+$  calcd for  $\text{C}_{26}\text{H}_{21}\text{NO}_2^+$ , 380.16451; found 380.16464.

## F. Synthesis of Pentacene and Tetracene Precursors

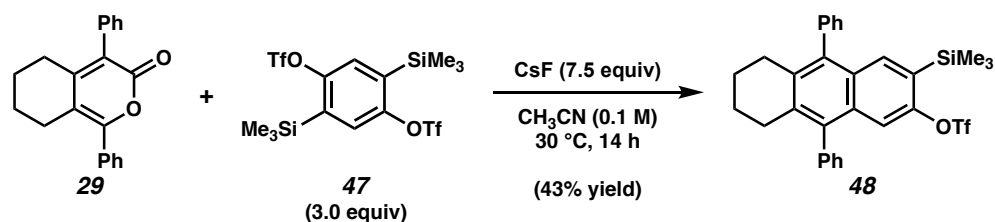

**Silyl Triflate 48.** To a stirred solution of pyrone **29** (15 mg, 50.0  $\mu\text{mol}$ , 1.0 equiv) and silyl triflate **47** (77.2 mg, 0.15 mmol, 3.0 equiv) in MeCN (0.5 mL, 0.1 M) was added CsF (56.5 mg, 0.37 mmol, 7.5 equiv). The reaction was purged with nitrogen for ten minutes before being sealed with a Teflon cap and left to stir at 30 °C. After 14 h, the reaction mixture was filtered through celite (monster pipette, 4 cm tall) with  $\text{CH}_2\text{Cl}_2$  (10 mL) as the eluent and then concentrated under reduced pressure. Purification of the crude material via flash chromatography (20:1 hexanes:PhH) afforded cycloadduct **48** (43% yield) as a light yellow solid. Cycloadduct **48**: mp 141–144 °C,  $R_f$  0.24 (20:1 hexanes:PhH);  $^1\text{H-NMR}$  (500 MHz,  $\text{CDCl}_3$ ):  $\delta$  7.54–7.51 (m, 4H),  $\delta$  7.50 (s, 1H),  $\delta$  7.47–7.44 (m, 2H),  $\delta$  2.66–2.64 (m, 4H),  $\delta$  1.73–1.70 (m, 4H),  $\delta$  0.19 (s, 9H);  $^{13}\text{C-NMR}$  (125 MHz,  $\text{CDCl}_3$ ): 152.2, 139.3, 138.8, 138.0, 137.8, 136.1, 135.9, 135.0, 132.3, 130.1, 130.0, 129.7, 128.7, 128.6, 127.5, 127.4, 119.8, 117.2, 115.4, 115.3, 29.5, 29.4, 22.9, 22.8, –0.7; IR (film): 1391, 1264, 842, 732, 703  $\text{cm}^{-1}$ ; HRMS-APCI ( $m/z$ ) [ $M + H$ ] $^+$  calcd for  $\text{C}_{30}\text{H}_{29}\text{F}_3\text{O}_3\text{SSi}^+$ , 555.1631; found 555.1596.

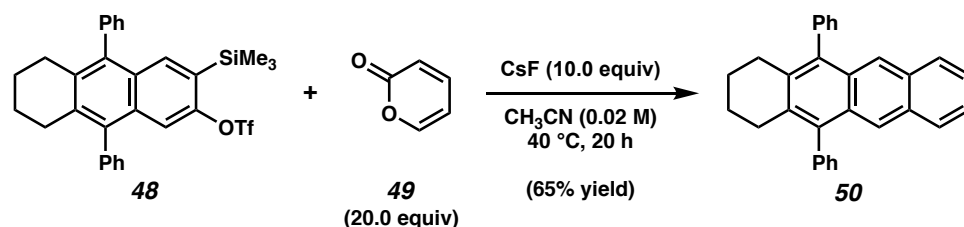

**Tetracene Precursor 50.** To a stirred solution of silyl triflate **48** (130 mg, 0.230 mmol, 1.0 equiv) and pyrone **49** (75 mg, 4.69 mmol, 20.0 equiv) in degassed MeCN (11.7 mL, 0.02 M) was added CsF (356 mg, 2.34 mmol, 10.0 equiv). The reaction was purged with nitrogen for ten minutes before being sealed with a Teflon cap and left to stir at 40 °C. After 20 h, the reaction mixture was filtered through celite (fritted funnel, 3 cm tall) with CH<sub>2</sub>Cl<sub>2</sub> (50 mL) as the eluent and then concentrated under reduced pressure. Purification of the crude material via flash chromatography (100:1 hexanes:PhH → 10:1 hexanes:PhH) afforded tetracene precursor **50** (65% yield) as a light yellow solid. Tetracene precursor **50**: mp 199–202 °C, R<sub>f</sub> 0.32 (100% hexanes); <sup>1</sup>H-NMR (500 MHz, CDCl<sub>3</sub>): δ 7.88 (s, 2H), δ 7.75–7.73 (dd, *J* = 3.2, 6.3, 2H), δ 7.60–7.57 (m, 4H), δ 7.53–7.49 (m, 2H), δ 7.40–7.37 (m, 4H), δ 7.30–7.28 (m, 2H), δ 2.68–2.67 (m, 4H), δ 1.75–1.72 (m, 4H); <sup>13</sup>C-NMR (125 MHz, CDCl<sub>3</sub>): 140.4, 137.1, 133.6, 130.8, 130.6, 130.5, 128.7, 128.3, 127.1, 124.9, 124.7, 29.5, 23.1; IR (film): 1264, 732, 703 cm<sup>-1</sup>; HRMS-APCI (*m/z*) [*M* + *H*]<sup>+</sup> calcd for C<sub>30</sub>H<sub>24</sub><sup>+</sup>, 385.19508; found 385.19197.

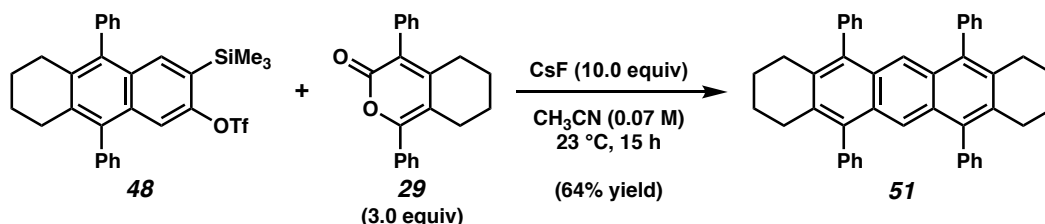

**Pentacene Precursor 51.** To a stirred solution of silyl triflate **48** (10 mg, 0.0180 mmol, 1.0 equiv) and pyrone **29** (16.4 mg, 0.0541 mmol, 3.0 equiv) in degassed MeCN (0.258 mL) was added CsF (27.4 mg, 0.0180 mmol, 10.0 equiv). The reaction was purged with nitrogen for ten minutes before being sealed with a Teflon cap and left to stir at 23 °C. After 15 h, the reaction mixture was filtered through celite (monster pipette, 4 cm tall) with CH<sub>2</sub>Cl<sub>2</sub> (10 mL) as the eluent and then concentrated under reduced pressure. Purification of the crude material via flash chromatography (10:1 hexanes:PhH → 5:1 hexanes:PhH) afforded pentacene precursor **51** (64% yield) as a yellow solid. Pentacene precursor **51**: mp >260 °C, R<sub>f</sub> 0.12 (100% hexanes); <sup>1</sup>H-NMR (500 MHz, CD<sub>2</sub>Cl<sub>2</sub>): δ 7.30–7.26 (m, 14H), δ 7.12–7.11 (m, 8H), δ 2.63 (m, 8H), δ 1.68 (m, 8H); <sup>13</sup>C-NMR (500 MHz, CD<sub>2</sub>Cl<sub>2</sub>): 140.1, 137.2, 133.2, 130.4, 130.0, 128.4, 126.8, 123.4, 29.5, 23.3; IR (film): 2988, 1424, 1264, 731, 703 cm<sup>-1</sup>; HRMS-APCI (*m/z*) [*M* + *H*]<sup>+</sup> calcd for C<sub>46</sub>H<sub>38</sub><sup>+</sup>, 591.30463; found 591.30200.



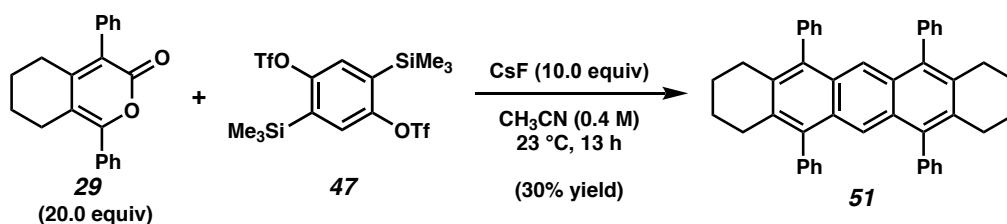

**Pentacene Precursor 51.** To a stirred solution of pyrone **29** (233 mg, 0.771 mmol, 20.0 equiv) and silyl triflate **47** (20.0 mg, 0.0386 mmol, 1.0 equiv) in degassed MeCN (1.10 mL) was added CsF (58.6 mg, 0.386 mmol, 10.0 equiv). The reaction was purged with nitrogen for ten minutes before being sealed with a Teflon cap and left to stir at 23 °C. After 13 h, the reaction mixture was filtered through celite (monster pipette, 4 cm tall) with CH<sub>2</sub>Cl<sub>2</sub> (10 mL) as the eluent and then concentrated under reduced pressure. Purification of the crude material via flash chromatography (10:1 hexanes:PhH → 5:1 hexanes:PhH) afforded pentacene precursor **51** (30% yield) as a yellow solid. Spectral data for pentacene precursor **51** matched those previously reported (see page S16).

### G. Aryne Addition to PAH Scaffold

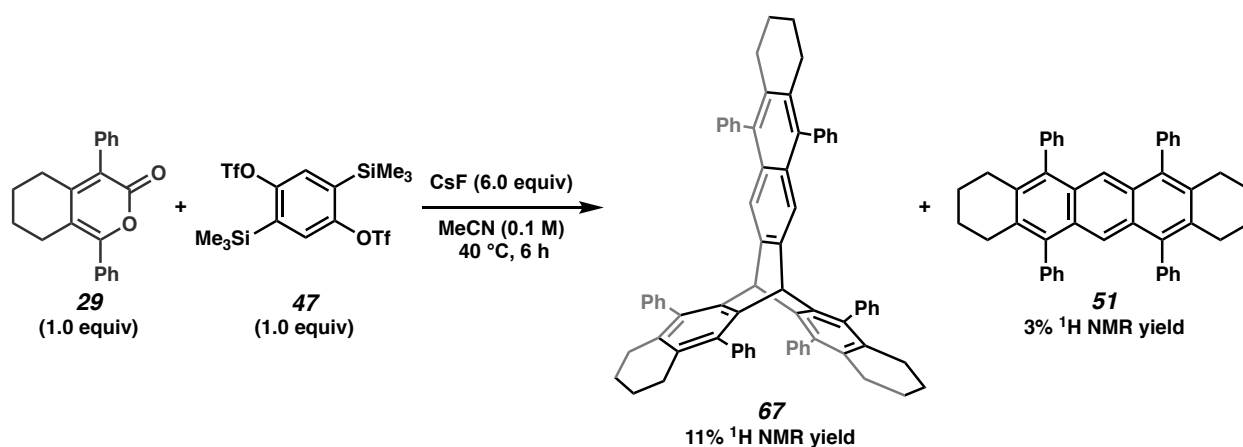

**Triptycene derivative 67.** To a stirred solution of pyrone **29** (8.8 mg, 0.029 mmol, 1.0 equiv) and silyl triflate **47** (15.0 mg, 0.029 mmol, 1.0 equiv) in degassed MeCN (0.300 mL) was added CsF (26.4 mg, 0.174 mmol, 6.0 equiv). The reaction was purged with nitrogen for ten minutes before being sealed with a Teflon cap and left to stir at 40 °C. After 6 h, the reaction mixture was filtered through celite (monster pipette, 4 cm tall) with CH<sub>2</sub>Cl<sub>2</sub> (10 mL) as the eluent and then concentrated under reduced pressure. Yields of triptycene derivative **67** and pentacene precursor **51** were determined using <sup>1</sup>H NMR analysis with 1,3,5-trimethoxybenzene as an external standard. Spectral

data for pentacene precursor **51** matched those previously reported (see page S16). Triptycene derivative **67**: mp >260 °C,  $R_f$  0.20 (100% hexanes);  $^1\text{H-NMR}$  (500 MHz,  $\text{CD}_2\text{Cl}_2$ ):  $\delta$  7.56–7.53 (m, 4H),  $\delta$  7.51–7.48 (m, 2H),  $\delta$  7.10–7.07 (td,  $J = 1.2, 7.4, 4\text{H}$ ),  $\delta$  7.24–7.20 (m, 8H),  $\delta$  7.19–7.16 (tt,  $J = 1.3, 7.4, 4\text{H}$ ),  $\delta$  6.98–6.96 (dt,  $J = 1.3, 7.3, 4\text{H}$ ),  $\delta$  6.79 (s, 2H),  $\delta$  6.77 (m, 4H),  $\delta$  4.77 (s, 2H),  $\delta$  2.56 (m, 4H),  $\delta$  2.40–2.34 (m, 4H),  $\delta$  2.18–2.12 (m, 4H),  $\delta$  1.68–1.66 (m, 4H),  $\delta$  1.26 (br s, 8H);  $^{13}\text{C-NMR}$  (125 MHz,  $\text{CD}_2\text{Cl}_2$ ): 142.1, 140.8, 140.3, 139.2, 137.9, 136.9, 133.3, 132.2, 130.5, 129.9, 129.7, 129.6, 128.7, 128.6, 127.8, 127.2, 126.8, 119.6, 30.0, 29.6, 29.2, 23.3; IR (film): 3053, 2988, 1736, 1419, 1264  $\text{cm}^{-1}$ ; HRMS-APCI ( $m/z$ )  $[\text{M} + \text{H}]^+$  calcd for  $\text{C}_{72}\text{H}_{58}^+$ , 921.44658; found 921.44299.

# **<sup>1</sup>H NMR**

Current Data Parameters  
 NAME JSB-2017-024  
 EXPNO 6  
 PROCNO 1

F2 - Acquisition Parameters  
 Date\_ 20171030  
 Time 8.50  
 INSTRUM av400  
 PROBHD 5 mm PABBO BB/  
 PULPROG zg30  
 TD 52882  
 SOLVENT CDCl3  
 NS 8  
 DS 0  
 SWH 8012.820 Hz  
 FIDRES 0.151523 Hz  
 AQ 3.2998369 sec  
 RG 189.85  
 DW 62.400 usec  
 DE 6.50 usec  
 TE 297.8 K  
 D1 2.00000000 sec  
 TD0 1

==== CHANNEL f1 =====  
 SFO1 400.1324008 MHz  
 NUC1 1H  
 P1 15.00 usec  
 PLW1 13.00000000 W

F2 - Processing parameters  
 SI 65536  
 SF 400.1300176 MHz  
 WDW EM  
 SSB 0  
 LB 0.30 Hz  
 GB 0  
 PC 1.00

7.622  
7.616  
7.611  
7.609  
7.607  
7.602  
7.598  
7.590  
7.485  
7.475  
7.471  
7.464  
7.454  
7.447  
7.444  
7.437  
7.431  
7.428  
7.385  
7.382  
7.378  
7.369  
7.363  
7.358  
7.348  
7.345  
7.342  
7.304  
7.301  
7.296  
7.287  
7.284  
7.281  
7.276

2.688  
2.681  
2.671  
2.661  
2.655  
2.531  
2.519  
2.514  
2.503  
2.497  
1.684  
1.675  
1.667  
1.658  
1.650

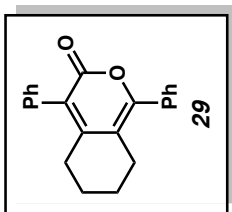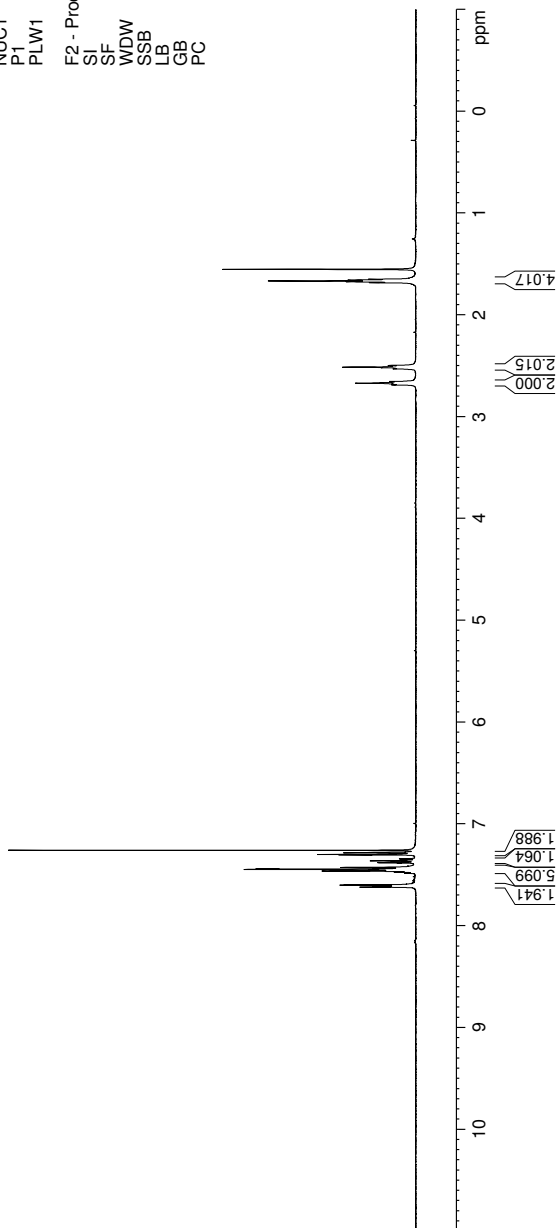



Current Data Parameters  
 NAME MI-2020-081-f9-28-H  
 EXPNO 1  
 PROCNO 1

F2 - Acquisition Parameters  
 Date\_ 20200701  
 Time 18.54 h  
 INSTRUM av500  
 PROBHD Z119248\_0002 (  
 PULPROG zg30  
 TD 65536  
 SOLVENT CDCl3  
 NS 6  
 DS 0  
 SWH 10000.000 Hz  
 FIDRES 0.305176 Hz  
 AQ 3.2767999 sec  
 RG 12.14  
 DW 50.000 usec  
 DE 10.00 usec  
 TE 298.0 K  
 D1 2.00000000 sec  
 TD0 1  
 SFO1 500.1330008 MHz  
 NUC1 1H  
 P1 10.00 usec  
 PLW1 13.50000000 W

F2 - Processing parameters  
 SI 65536  
 SF 500.1300120 MHz  
 WDW EM  
 SSB 0  
 LB 0  
 GB 0  
 PC 1.00

1.715  
 2.631

7.545  
 7.530  
 7.515  
 7.466  
 7.452  
 7.437  
 7.356  
 7.349  
 7.343  
 7.330  
 7.315  
 7.242  
 7.235  
 7.229  
 7.222

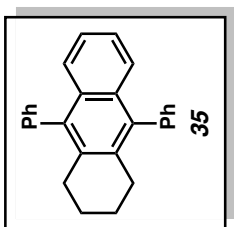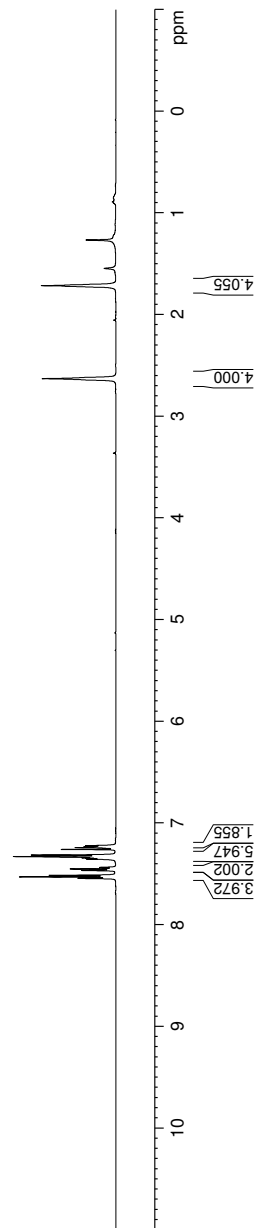

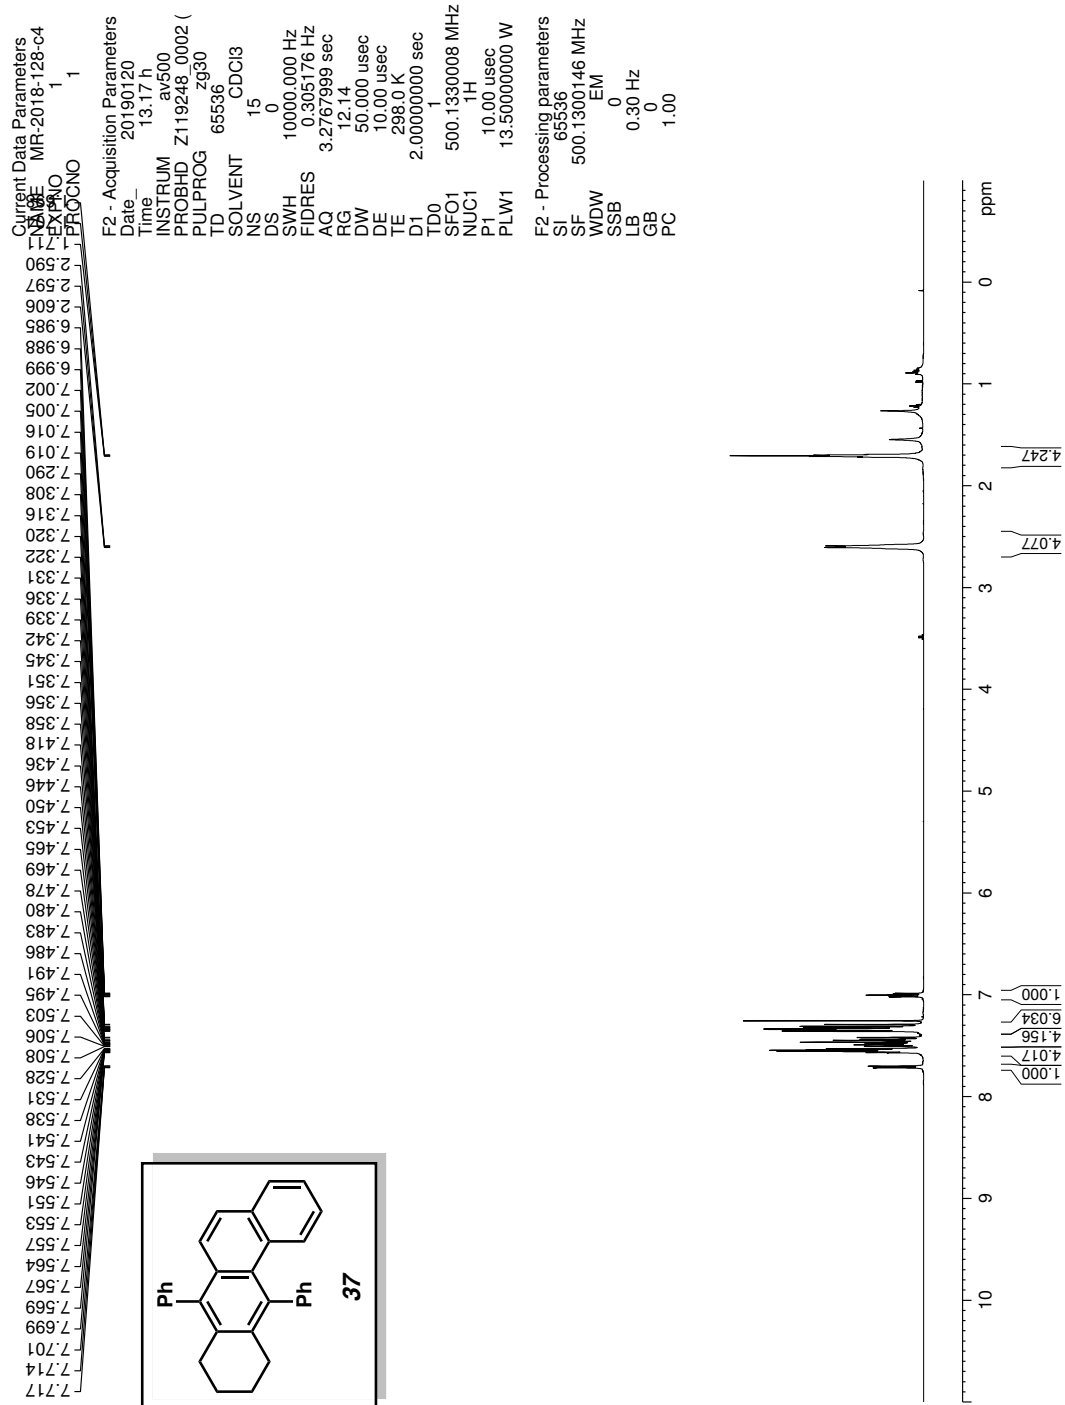

Current Data Parameters  
 NAME MR-2019-139-131-pdt  
 EXPNO 1  
 PROCNO 1

F2 - Acquisition Parameters  
 Date\_ 20200702  
 Time\_ 14.04 h  
 INSTRUM av500  
 PROBHD Z119248\_0002 (  
 PULPROG zg30  
 TD 65536  
 SOLVENT CDCl3  
 NS 4  
 DS 0  
 SWH 10000.000 Hz  
 FIDRES 0.305176 Hz  
 AQ 3.2767999 sec  
 RG 12.14  
 DW 50.000 usec  
 DE 10.00 usec  
 TE 298.0 K  
 D1 2.00000000 sec  
 TD0 1  
 SFO1 500.1330008 MHz  
 NUC1 1H  
 P1 10.00 usec  
 PLW1 13.50000000 W

F2 - Processing parameters  
 SI 65536  
 SF 500.1300117 MHz  
 WDW EM  
 SSB 0  
 LB 0.30 Hz  
 GB 0  
 PC 1.00

1.713  
 1.725  
 2.597  
 2.639

5.046  
 6.837  
 6.842  
 6.848  
 7.129  
 7.147  
 7.270  
 7.288  
 7.335  
 7.349  
 7.391  
 7.404  
 7.431  
 7.446  
 7.460  
 7.514  
 7.529  
 7.537  
 7.543  
 7.561  
 7.576  
 7.590  
 8.224

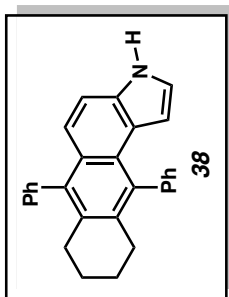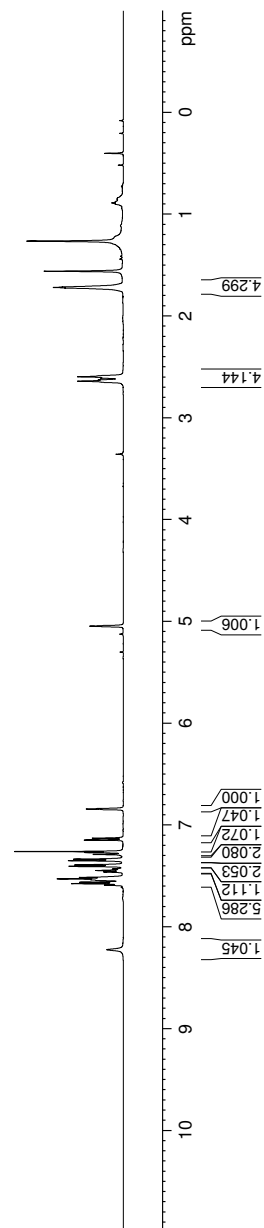



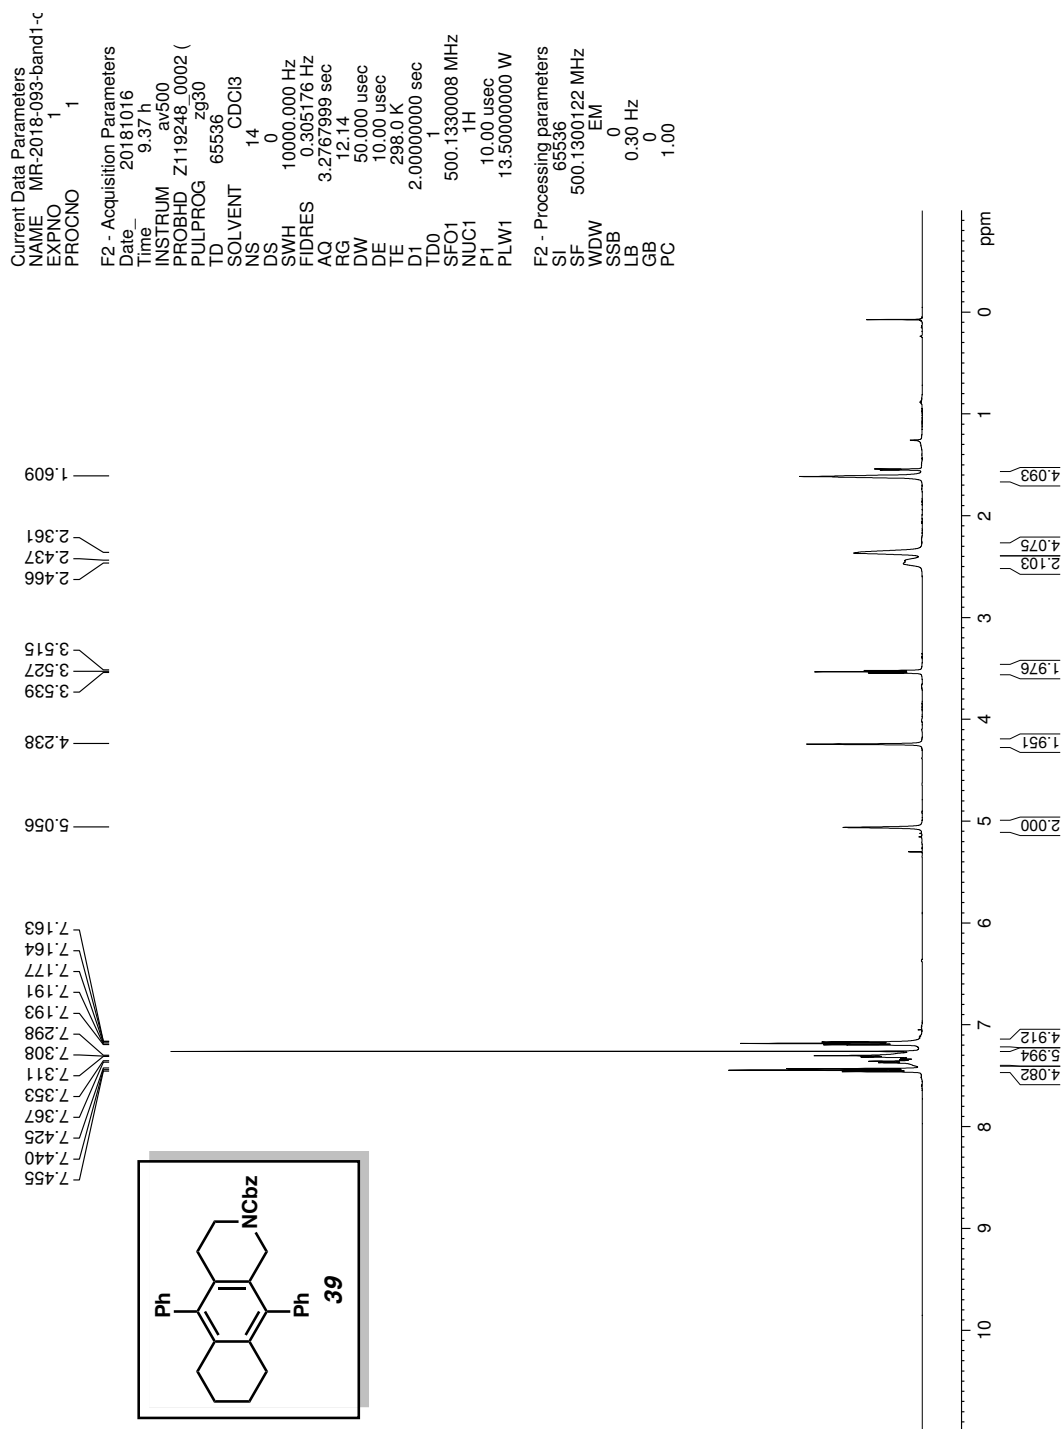

Current Data Parameters  
 NAME MIR-2019-052-053-pdt  
 EXPNO 1  
 PROCNO 1

F2 - Acquisition Parameters  
 Date\_ 20191014  
 Time 17:53 n  
 INSTRUM av500  
 PROBHD Z119248\_0002 ( Z930  
 PULPROG zg30  
 TD 65536  
 SOLVENT CDCl3  
 NS 5  
 DS 0  
 SWH 10000.000 Hz  
 FIDRES 0.305176 Hz  
 AQ 3.2767999 sec  
 RG 12.14  
 DW 50.000 usec  
 DE 10.00 usec  
 TE 298.0 K  
 D1 2.00000000 sec  
 TD0 1  
 SFO1 500.1330008 MHz  
 NUC1 1H  
 P1 10.00 usec  
 PLW1 13.50000000 W

F2 - Processing parameters  
 SI 65536  
 SF 500.1300123 MHz  
 WDW EM  
 SSB 0  
 LB 0.30 Hz  
 GB 0  
 PC 1.00

7.467  
7.453  
7.438  
7.377  
7.366  
7.362  
7.347  
7.218  
7.203  
7.188

4.171

3.461  
3.449

2.443  
2.431  
2.378

1.622  
1.382

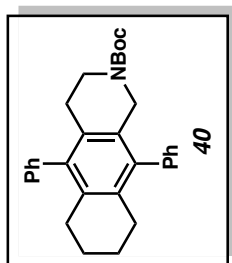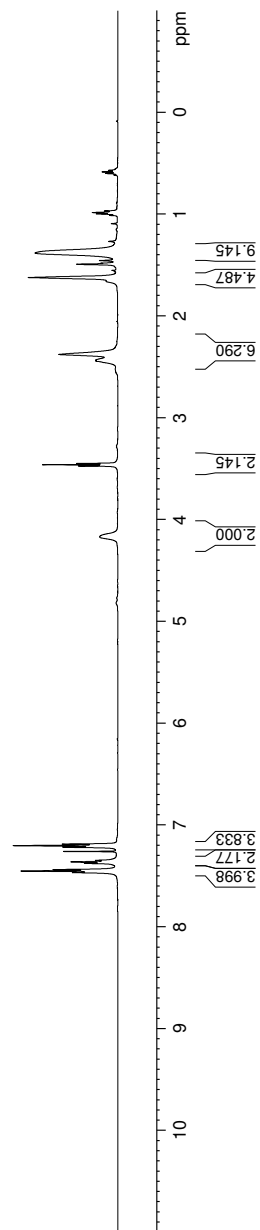

Current Data Parameters  
 NAME MR-2019-098-pdt  
 EXPNO 1  
 PROCNO 1

F2 - Acquisition Parameters  
 Date\_ 20190423  
 Time 11.45 h  
 INSTRUM av500  
 PROBHD Z119248\_0002 (  
 PULPROG zg30  
 TD 65536  
 SOLVENT CDCl3  
 NS 11  
 DS 0  
 SWH 1000.000 Hz  
 FIDRES 0.305176 Hz  
 AQ 3.2767999 sec  
 RG 12.14  
 DW 50.000 usec  
 DE 10.00 usec  
 TE 298.0 K  
 D1 2.0000000 sec  
 TD0 1  
 SFO1 500.1330008 MHz  
 NUC1 1H  
 P1 10.00 usec  
 PLW1 13.50000000 W

F2 - Processing parameters  
 SI 65536  
 SF 500.1300121 MHz  
 WDW EM  
 SSB 0  
 LB 0.30 Hz  
 GB 0  
 PC 1.00

7.469  
7.465  
7.458  
7.454  
7.447  
7.444  
7.442  
7.439  
7.432  
7.429  
7.377  
7.374  
7.371  
7.367  
7.363  
7.359  
7.355  
7.347  
7.344  
7.342  
7.211  
7.208  
7.204  
7.195  
7.192  
7.188  
7.179  
7.176  
4.351  
3.798  
3.786  
3.775  
2.431  
2.419  
2.408  
2.377  
2.363  
2.348  
1.636  
1.629  
1.623  
1.617  
1.610

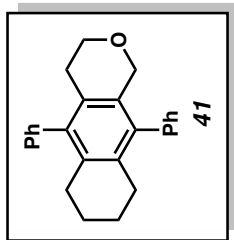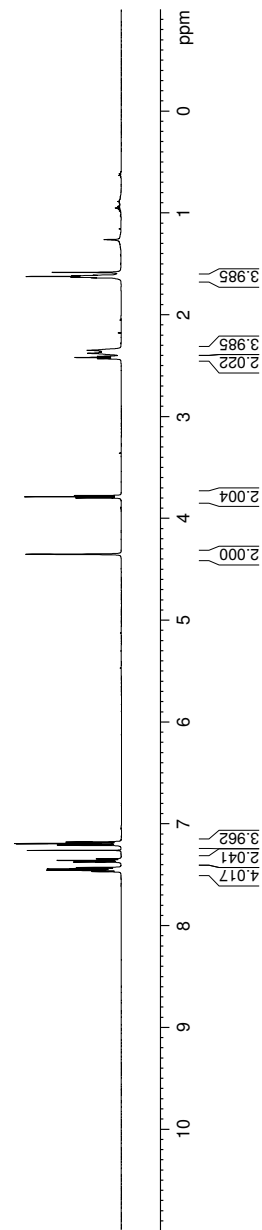

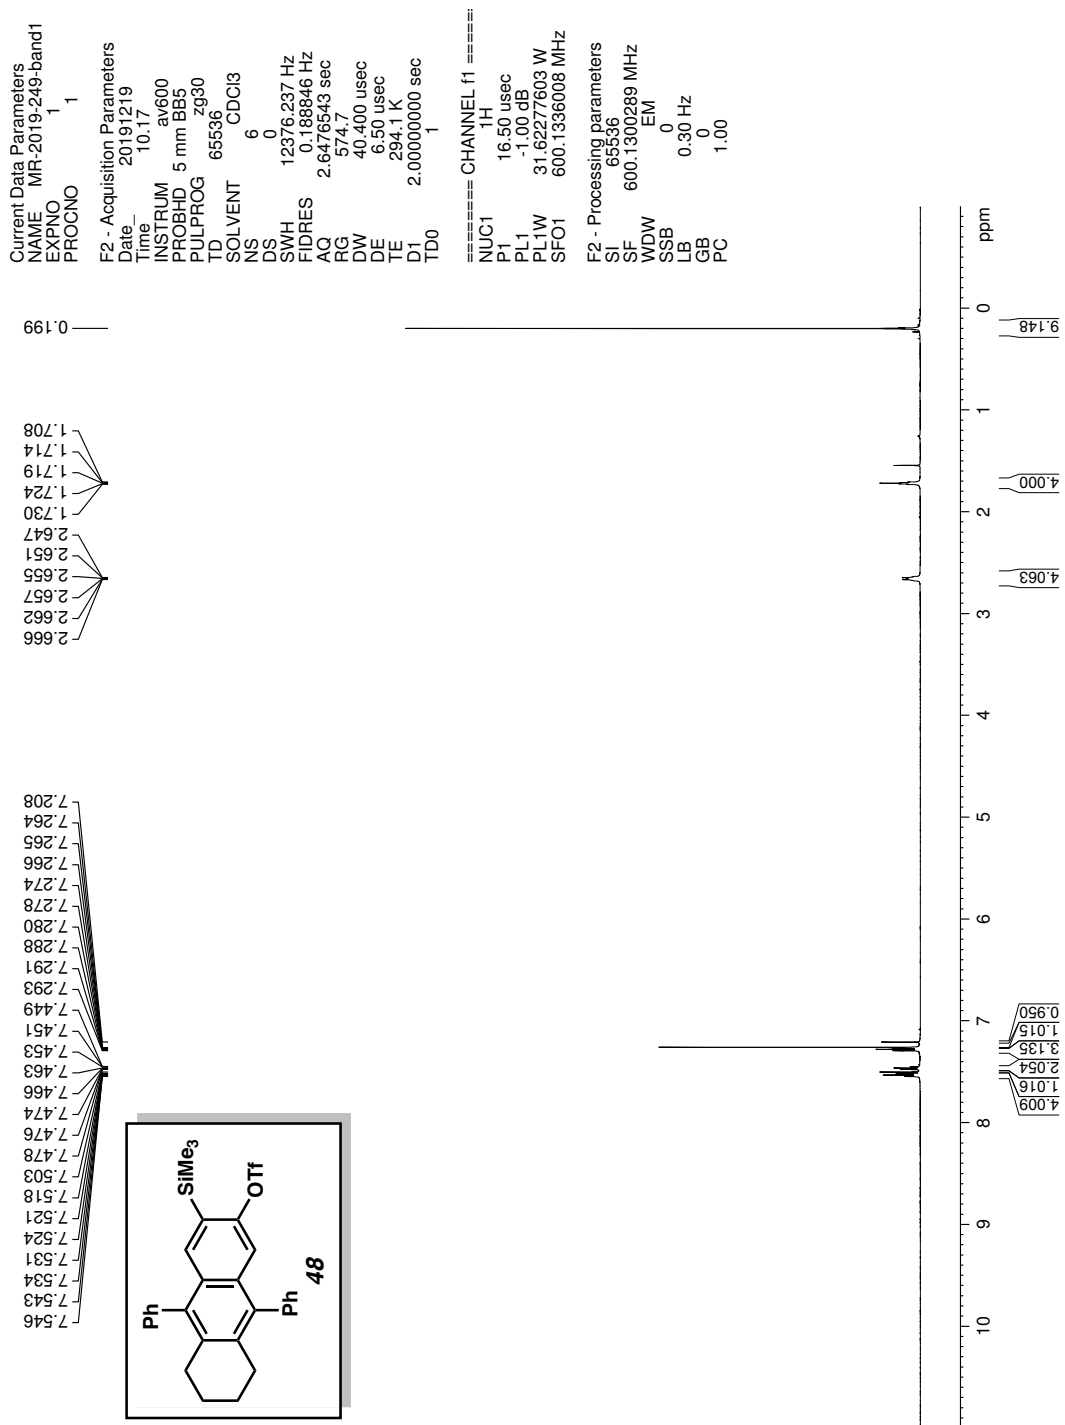

Current Data Parameters  
 NAME MR-2019-221-f17-34  
 EXPNO 1  
 PROCNO 1

F2 - Acquisition Parameters  
 Date\_ 20191111  
 Time 9.45 H  
 INSTRUM av500  
 PROBHD Z119248\_0002 (  
 PULPROG zg30  
 TD 65536  
 SOLVENT GDCl3  
 NS 6  
 DS 0  
 SWH 1000.000 Hz  
 FIDRES 0.305176 Hz  
 AQ 3.2767999 sec  
 RG 12.14  
 DW 50.000 usec  
 DE 10.00 usec  
 TE 298.0 K  
 D1 2.00000000 sec  
 TD0 1  
 SFO1 500.1330008 MHz  
 NUC1 1H  
 P1 10.00 usec  
 PLW1 13.50000000 W

F2 - Processing parameters  
 SI 65536  
 SF 500.1300121 MHz  
 WDW EM  
 SSB 0  
 LB 0.30 Hz  
 GB 0  
 PC 1.00

1.729  
 1.737  
 1.743  
 1.749  
 1.756  
 2.672  
 2.685

7.288  
 7.295  
 7.301  
 7.308  
 7.314  
 7.320  
 7.326  
 7.332  
 7.338  
 7.344  
 7.350  
 7.356  
 7.362  
 7.368  
 7.374  
 7.380  
 7.386  
 7.392  
 7.398  
 7.404  
 7.410  
 7.416  
 7.422  
 7.428  
 7.434  
 7.440  
 7.446  
 7.452  
 7.458  
 7.464  
 7.470  
 7.476  
 7.482  
 7.488  
 7.494  
 7.500  
 7.506  
 7.512  
 7.518  
 7.524  
 7.530  
 7.536  
 7.542  
 7.548  
 7.554  
 7.560  
 7.566  
 7.572  
 7.578  
 7.584  
 7.590  
 7.596  
 7.602  
 7.608  
 7.614  
 7.620  
 7.626  
 7.632  
 7.638  
 7.644  
 7.650  
 7.656  
 7.662  
 7.668  
 7.674  
 7.680  
 7.686  
 7.692  
 7.698  
 7.704  
 7.710  
 7.716  
 7.722  
 7.728  
 7.734  
 7.740  
 7.746  
 7.752  
 7.758  
 7.764  
 7.770  
 7.776  
 7.782  
 7.788

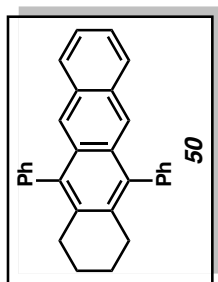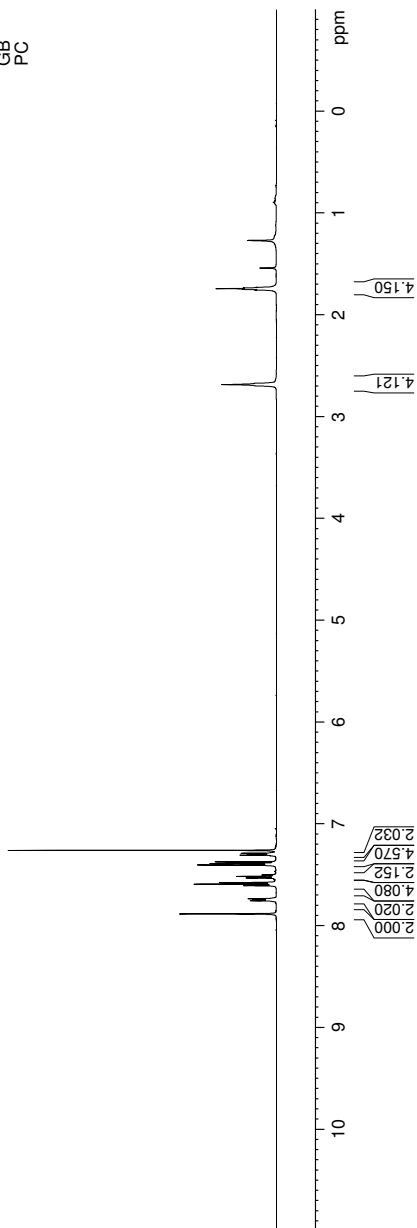

Current Data Parameters  
 NAME MR-2019-181-c2-f21-3  
 EXPNO 1  
 PROCNO 1

F2 - Acquisition Parameters  
 Date\_ 20200702  
 Time 17.20 h  
 INSTRUM av500  
 PROBHD Z119248\_0002 (  
 PULPROG zg30  
 TD 65536  
 SOLVENT CD2Cl2  
 NS 5  
 DS 0  
 SWH 10000.000 Hz  
 FIDRES 0.305176 Hz  
 AQ 3.2767999 sec  
 RG 12.14  
 DW 50.000 usec  
 DE 10.00 usec  
 TE 298.0 K  
 D1 2.00000000 sec  
 TD0 1  
 SFO1 500.1330008 MHz  
 NUC1 <sup>1</sup>H  
 P1 10.00 usec  
 PLW1 13.50000000 W

F2 - Processing parameters  
 SI 65536  
 SF 500.1300146 MHz  
 WDW EM  
 SSB 0  
 LB 0.30 Hz  
 GB 0  
 PC 1.00

1.684  
 2.634

7.113  
 7.127  
 7.261  
 7.276  
 7.290  
 7.316  
 7.331

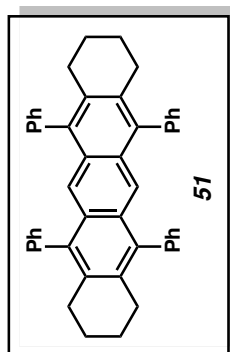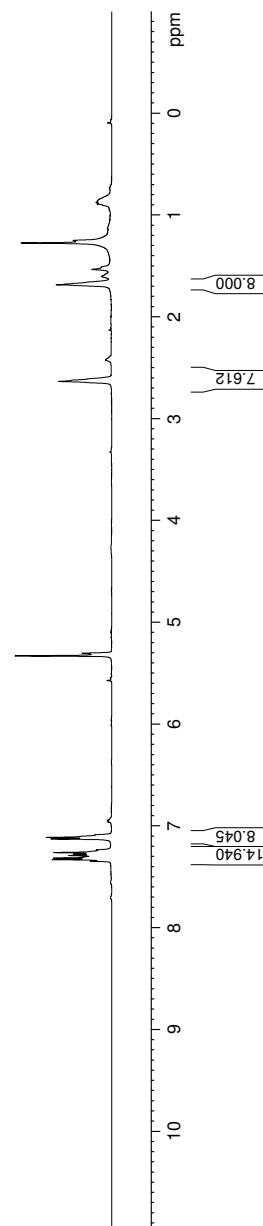

Current Data Parameters  
 NAME ERD-2018-172-sm  
 EXPNO 1  
 PROCNO 1

F2 - Acquisition Parameters  
 Date\_ 20181105  
 Time 10.05 h  
 INSTRUM av500  
 PROBHD Z119248\_0002 (  
 PULPROG zg30  
 TD 65536  
 SOLVENT CDCl3  
 NS 4  
 DS 0  
 SWH 10000.000 Hz  
 FIDRES 0.305176 Hz  
 AQ 3.2767999 sec  
 RG 6.59  
 DW 50.000 usec  
 DE 10.00 usec  
 TE 298.0 K  
 D1 2.00000000 sec  
 TD0 1  
 SFO1 500.1330008 MHz  
 NUC1 1H  
 P1 10.00 usec  
 PLW1 13.50000000 W

F2 - Processing parameters  
 SI 65536  
 SF 500.1300121 MHz  
 WDW EM  
 SSB 0  
 LB 0.30 Hz  
 GB 0  
 PC 1.00

1.437  
 0.993  
 0.977  
 0.961  
 0.711  
 0.695  
 0.679  
 0.664

2.250

3.547

4.049

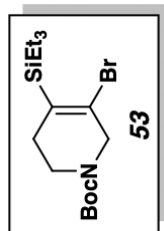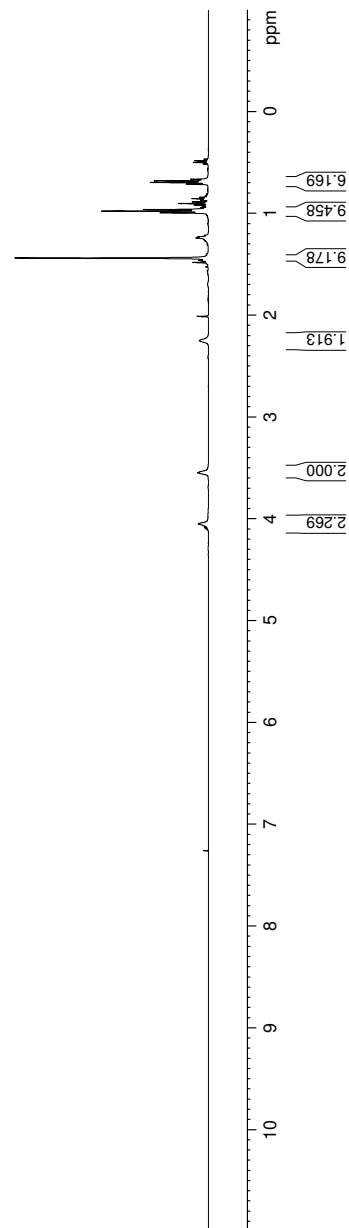

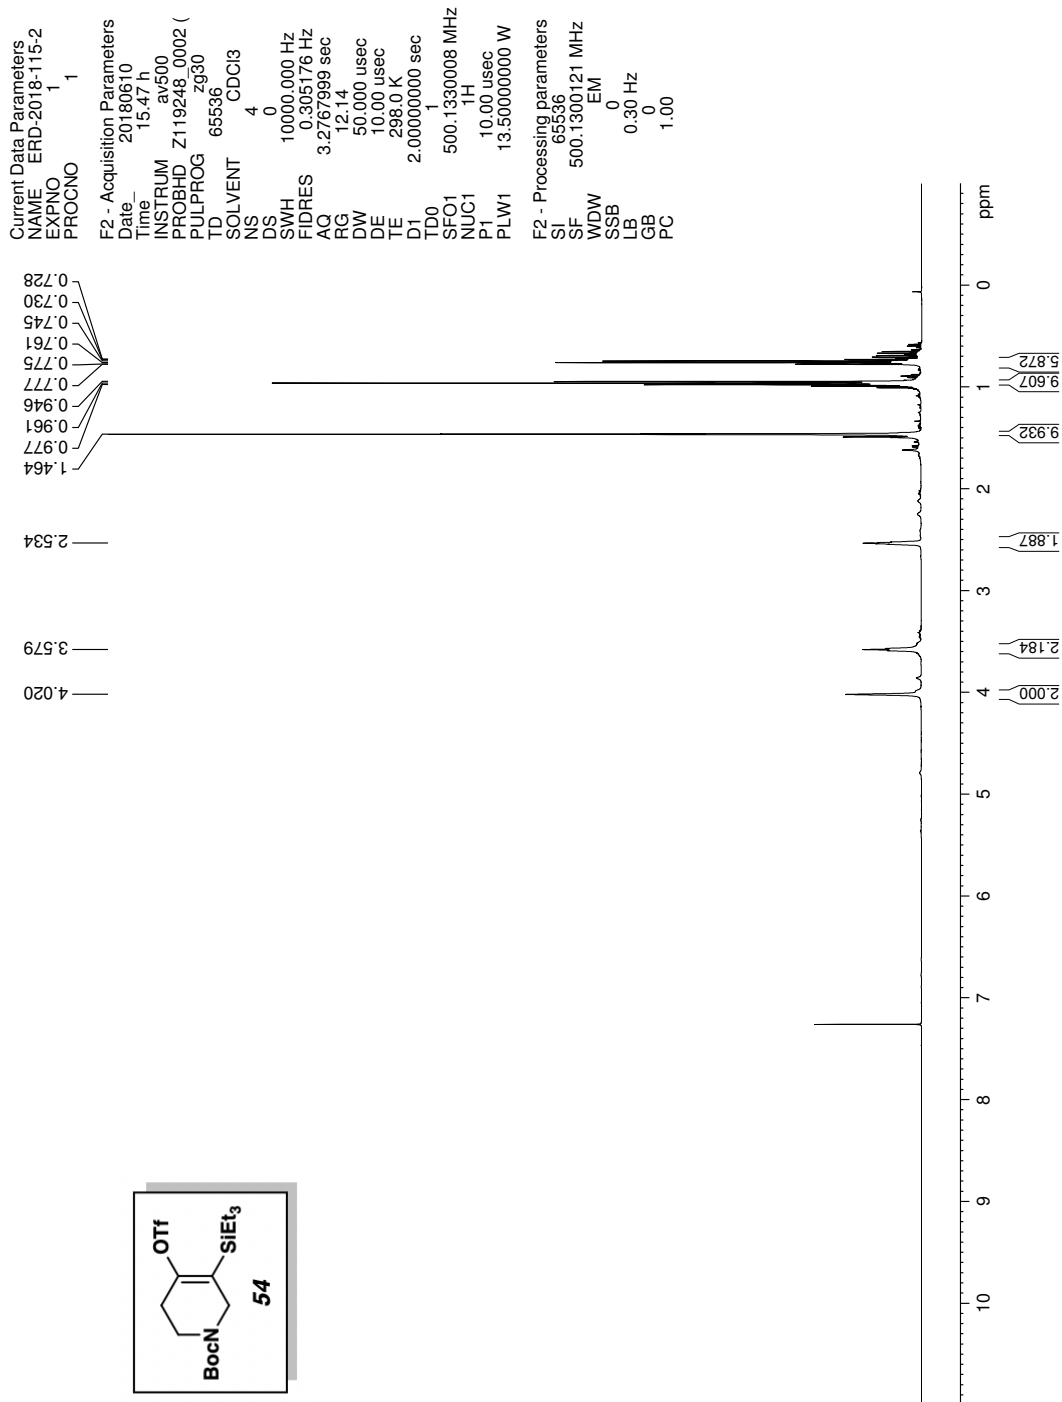



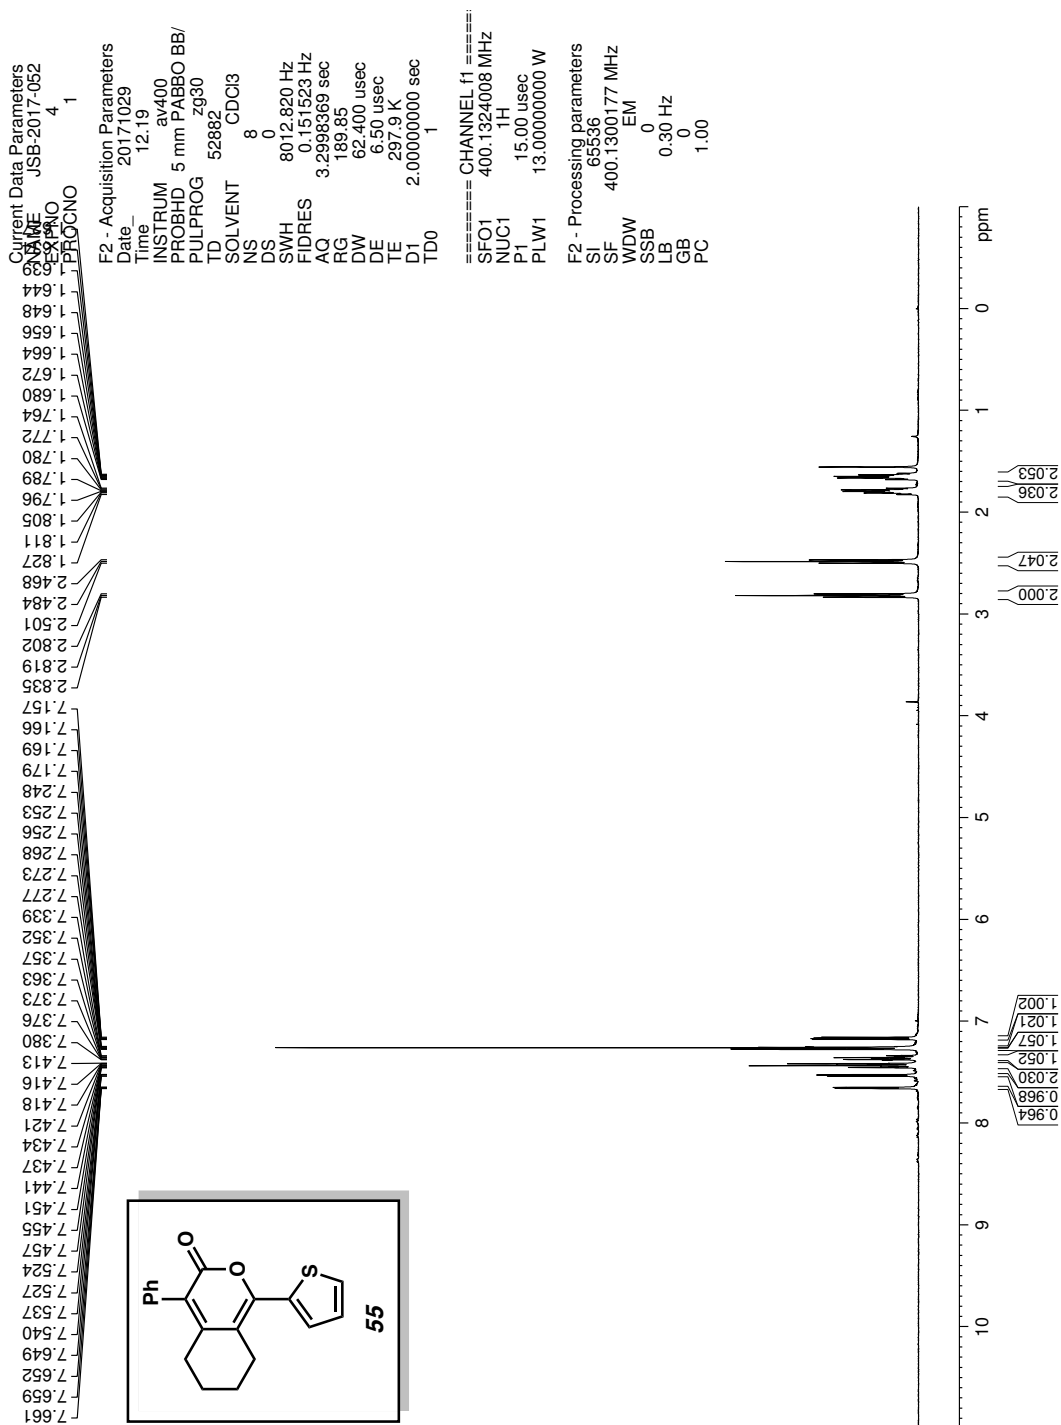

Current Data Parameters  
 NAME JSB-2017-054  
 EXPNO 5  
 PROCNO 1

F2 - Acquisition Parameters  
 Date\_ 20171031  
 Time 8.40  
 INSTRUM av400  
 PROBHD 5 mm PABBO BB/  
 PULPROG zg30  
 TD 52882  
 SOLVENT CDCl3  
 NS 8  
 DS 0  
 SWH 8012.820 Hz  
 FIDRES 0.151523 Hz  
 AQ 3.2998369 sec  
 RG 107.83  
 DW 62.400 usec  
 DE 6.50 usec  
 TE 297.7 K  
 D1 2.0000000 sec  
 TDO 1

==== CHANNEL f1 =====  
 SFO1 400.1324008 MHz  
 NUC1 1H  
 P1 15.00 usec  
 PLW1 13.00000000 W

F2 - Processing parameters  
 SI 65536  
 SF 400.1300177 MHz  
 WDW EM  
 SSB 0  
 LB 0.30 Hz  
 GB 0  
 PC 1.00

1.640  
1.649  
1.657  
1.664  
1.674  
2.479  
2.482  
2.485  
2.496  
2.507  
2.510  
2.513  
2.553  
2.556  
2.670  
2.683  
2.686  
3.860  
6.948  
6.955  
6.961  
6.972  
6.978  
6.985  
7.260  
7.265  
7.270  
7.273  
7.277  
7.285  
7.291  
7.294  
7.330  
7.334  
7.337  
7.346  
7.352  
7.357  
7.367  
7.371  
7.374  
7.418  
7.421  
7.434  
7.437  
7.441  
7.451  
7.455  
7.457  
7.554  
7.562  
7.567  
7.579

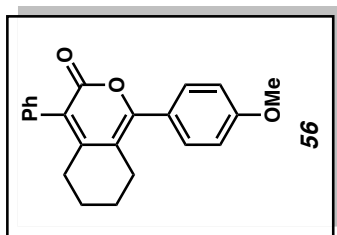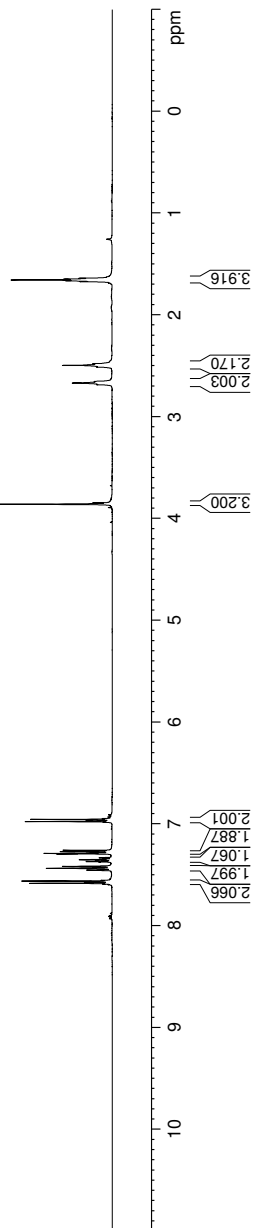

Current Data Parameters  
 NAME USB-2017-055  
 EXPNO 5  
 PROCNO 1

F2 - Acquisition Parameters  
 Date\_ 20171031  
 Time 20:20  
 INSTRUM av400  
 PROBHD 5 mm PABBO BB/  
 PULPROG zg30  
 TD 52882  
 SOLVENT CDCl3  
 NS 16  
 DS 0  
 SWH 8012.820 Hz  
 FIDRES 0.151523 Hz  
 AQ 3.2998369 sec  
 RG 155.85  
 DW 62.400 usec  
 DE 6.50 usec  
 TE 298.0 K  
 D1 2.00000000 sec  
 TD0 1

==== CHANNEL f1 =====  
 SFO1 400.1324008 MHz  
 NUC1 1H  
 P1 15.00 usec  
 PLW1 13.00000000 W

F2 - Processing parameters  
 SI 65536  
 SF 400.1300177 MHz  
 WDW EM  
 SSB 0  
 LB 0.30 Hz  
 GB 0  
 PC 1.00

7.608  
7.603  
7.591  
7.586  
7.505  
7.500  
7.495  
7.483  
7.478  
7.472  
7.466  
7.463  
7.459  
7.449  
7.445  
7.442  
7.430  
7.426  
7.421  
7.388  
7.384  
7.381  
7.371  
7.366  
7.360  
7.351  
7.347  
7.344  
7.289  
7.285  
7.280  
7.272  
7.268  
7.265

2.656  
2.640  
2.630  
2.623  
2.525  
2.519  
2.509  
2.504  
2.498  
2.492  
1.683  
1.674  
1.666  
1.658  
1.649

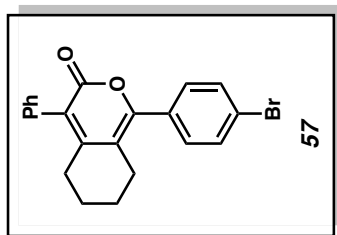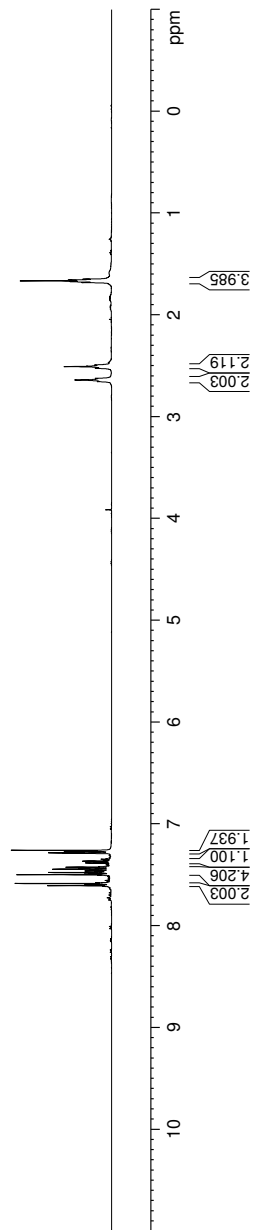



Current Data Parameters  
 NAME JSB-2018-019-06252C  
 EXPNO 1  
 PROCNO 1

F2 - Acquisition Parameters  
 Date\_ 20200625  
 Time 18.34 h  
 INSTRUM av500  
 PROBHD Z119248\_0002 (  
 PULPROG zg30  
 TD 65536  
 SOLVENT CDC13  
 NS 5  
 DS 0  
 SWH 10000.000 Hz  
 FIDRES 0.305176 Hz  
 AQ 3.2767999 sec  
 RG 26.69  
 DW 50.000 usec  
 DE 10.00 usec  
 TE 298.0 K  
 D1 2.00000000 sec  
 TD0 1  
 SFO1 500.1330008 MHz  
 NUC1 1H  
 P1 10.00 usec  
 PLW1 13.50000000 W

F2 - Processing parameters  
 SI 65536  
 SF 500.1300121 MHz  
 WDW EM  
 SSB 0  
 LB 0.30 Hz  
 GB 0  
 PC 1.00

1.716  
 1.728  
 1.734  
 1.739  
 1.752  
 2.596  
 2.608  
 2.620  
 2.620  
 2.767  
 2.780  
 2.792

7.009  
 7.014  
 7.226  
 7.233  
 7.236  
 7.243  
 7.284  
 7.298  
 7.314  
 7.332  
 7.435  
 7.450  
 7.464  
 7.509  
 7.522  
 7.539  
 7.555

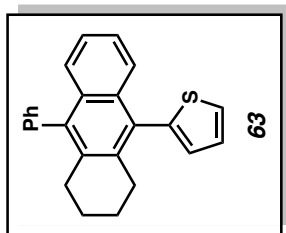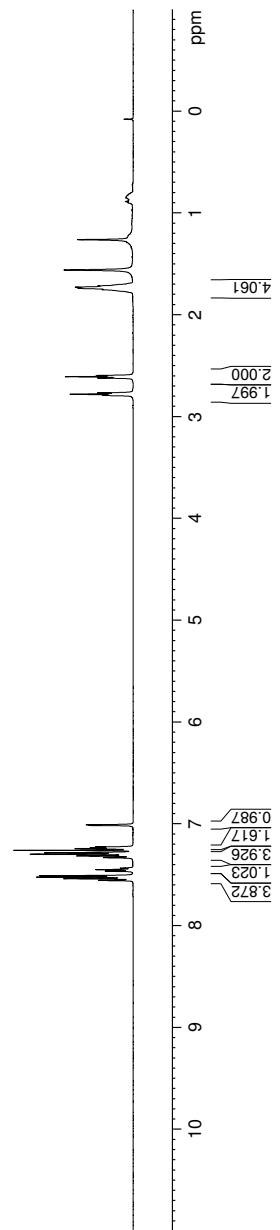

```

Current Data Parameters
NAME USB-2017-071
EXPNO 2
PROCNO 1

F2 - Acquisition Parameters
Date_ 20171107
Time 19.15
INSTRUM av400
PROBHD 5 mm PABBO BB/
PULPROG zg30
TD 52882
SOLVENT CDCl3
NS 8
DS 0
SWH 8012.820 Hz
FIDRES 0.151523 Hz
AQ 3.2998369 sec
RG 189.85
DW 62.400 usec
DE 6.50 usec
TE 298.0 K
D1 2.00000000 sec
TD0 1

===== CHANNEL f1 =====
SFO1 400.1324008 MHz
NUC1 1H
P1 15.00 usec
PLW1 13.00000000 W

F2 - Processing parameters
SI 65536
SF 400.1300184 MHz
WDW EM
SSB 0
LB 0.30 Hz
GB 0
PC 1.00
    
```

7.501  
7.462  
7.459  
7.455  
7.446  
7.440  
7.434  
7.425  
7.422  
7.418  
7.402  
7.395  
7.391  
7.382  
7.378  
7.342  
7.337  
7.329  
7.324  
7.321  
7.317  
7.312  
7.304  
7.300  
7.297  
7.292  
7.239  
7.235  
7.226  
7.223  
7.218  
7.213  
7.211  
7.084  
7.077  
7.072  
7.061  
7.056  
7.049  
3.917  
2.642  
2.632  
2.626  
2.616  
1.724  
1.716  
1.707  
1.699  
1.691

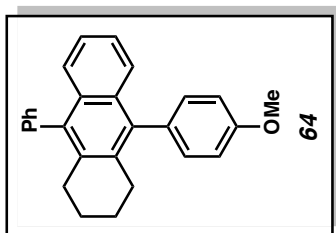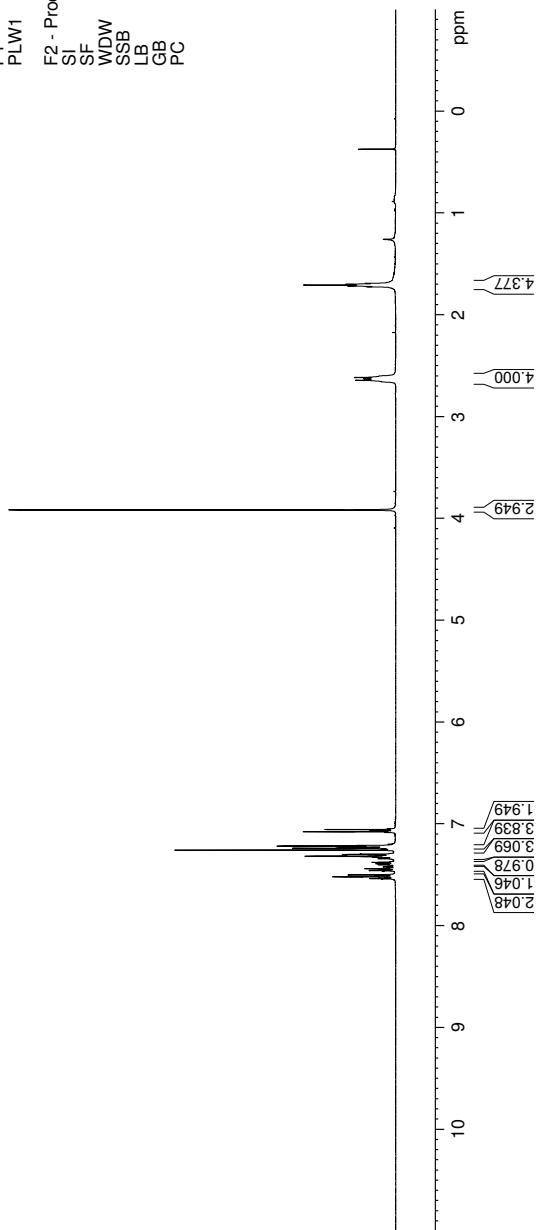

Current Data Parameters  
 NAME JSB-2017-073-101402  
 EXPNO 1  
 PROCNO 1

F2 - Acquisition Parameters

Date\_ 20191014  
 Time 17.42 h  
 INSTRUM av500  
 PROBHD Z119248\_0002 (  
 PULPROG zg30  
 TD 65536  
 SOLVENT 2 CDCI3  
 NS 0  
 DS 0  
 SWH 10000.000 Hz  
 FIDRES 0.305176 Hz  
 AQC 3.2767999 sec  
 RG 19.06  
 DW 50.000 usec  
 DE 10.00 usec  
 TE 298.0 K  
 D1 2.00000000 sec  
 TD0 1  
 SFO1 500.1330008 MHz  
 NUC1 1H  
 P1 10.00 usec  
 PLW1 13.50000000 W

F2 - Processing parameters

SI 65536  
 SF 500.1300121 MHz  
 WDW EM  
 SSB 0  
 LB 0.30 Hz  
 GB 0  
 PC 1.00

2.613  
 2.603  
 1.710

7.190  
 7.206  
 7.231  
 7.233  
 7.240  
 7.248  
 7.250  
 7.290  
 7.303  
 7.319  
 7.329  
 7.334  
 7.337  
 7.347  
 7.365  
 7.433  
 7.449  
 7.463  
 7.509  
 7.524  
 7.538  
 7.650  
 7.667

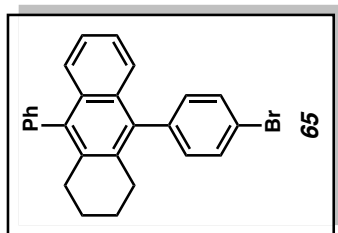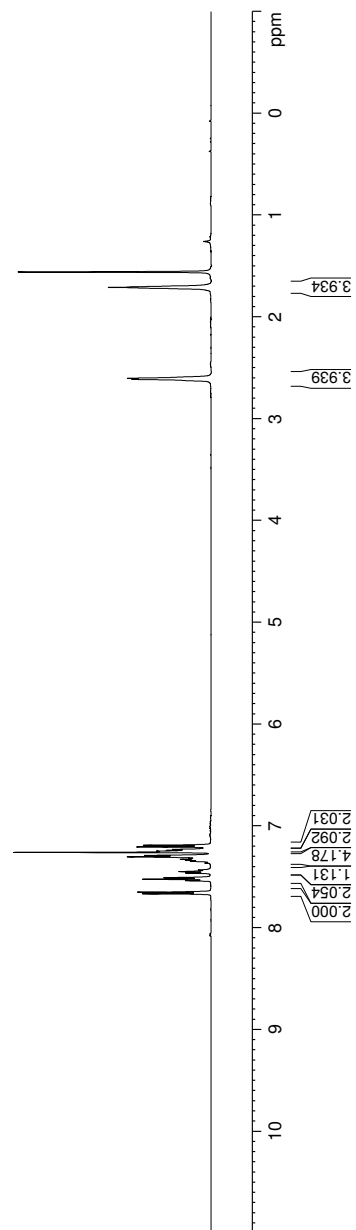

Current Data Parameters  
 NAME JSB-2018-016-06252C  
 EXPNO 1  
 PROCNO 1

F2 - Acquisition Parameters  
 Date\_ 20200625  
 Time 16:19 h  
 INSTRUM av500  
 PROBHD Z119248\_0002 (  
 PULPROG zg30  
 TD 65536  
 SOLVENT CDCl3  
 NS 7  
 DS 0  
 SWH 10000.000 Hz  
 FIDRES 0.305176 Hz  
 AQ 3.2767999 sec  
 RG 12.14  
 DW 50.000 usec  
 DE 10.00 usec  
 TE 298.0 K  
 D1 2.00000000 sec  
 TD0 1  
 SFO1 500.1330008 MHz  
 NUC1 1H  
 PLW1 13.50000000 W

F2 - Processing parameters  
 SI 65536  
 SF 500.1300122 MHz  
 WDW EM  
 SSB 0  
 LB 0.30 Hz  
 GB 0  
 PC 1.00

1.708  
1.715  
1.721  
1.728  
1.735  
2.554  
2.567  
2.614  
2.625  
2.638  
7.177  
7.183  
7.188  
7.191  
7.196  
7.250  
7.256  
7.269  
7.286  
7.289  
7.298  
7.302  
7.305  
7.347  
7.352  
7.358  
7.360  
7.365  
7.372  
7.379  
7.444  
7.446  
7.449  
7.457  
7.461  
7.465  
7.473  
7.476  
7.478  
7.501  
7.506  
7.510  
7.516  
7.519  
7.523  
7.528  
7.535  
7.538  
7.546

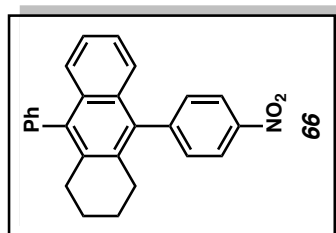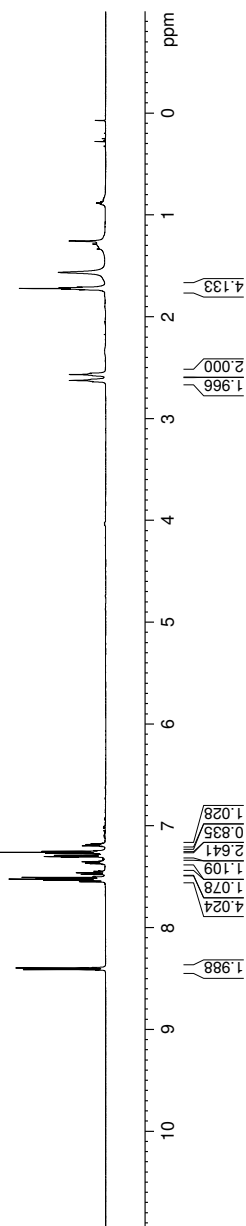



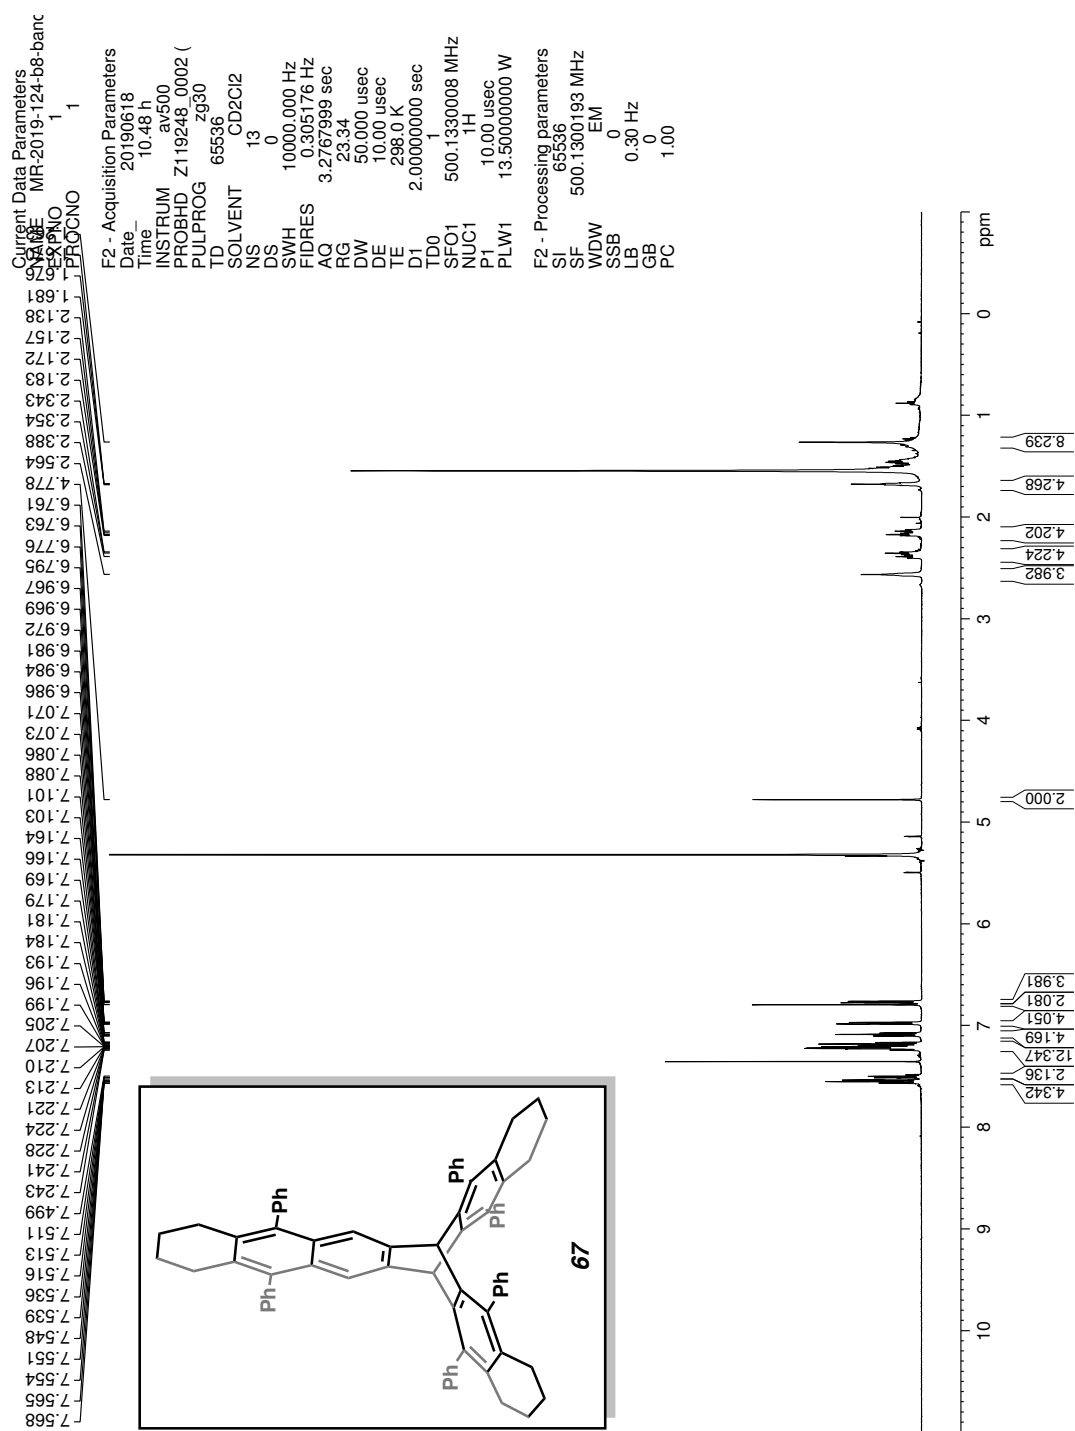

# **<sup>13</sup>C NMR**

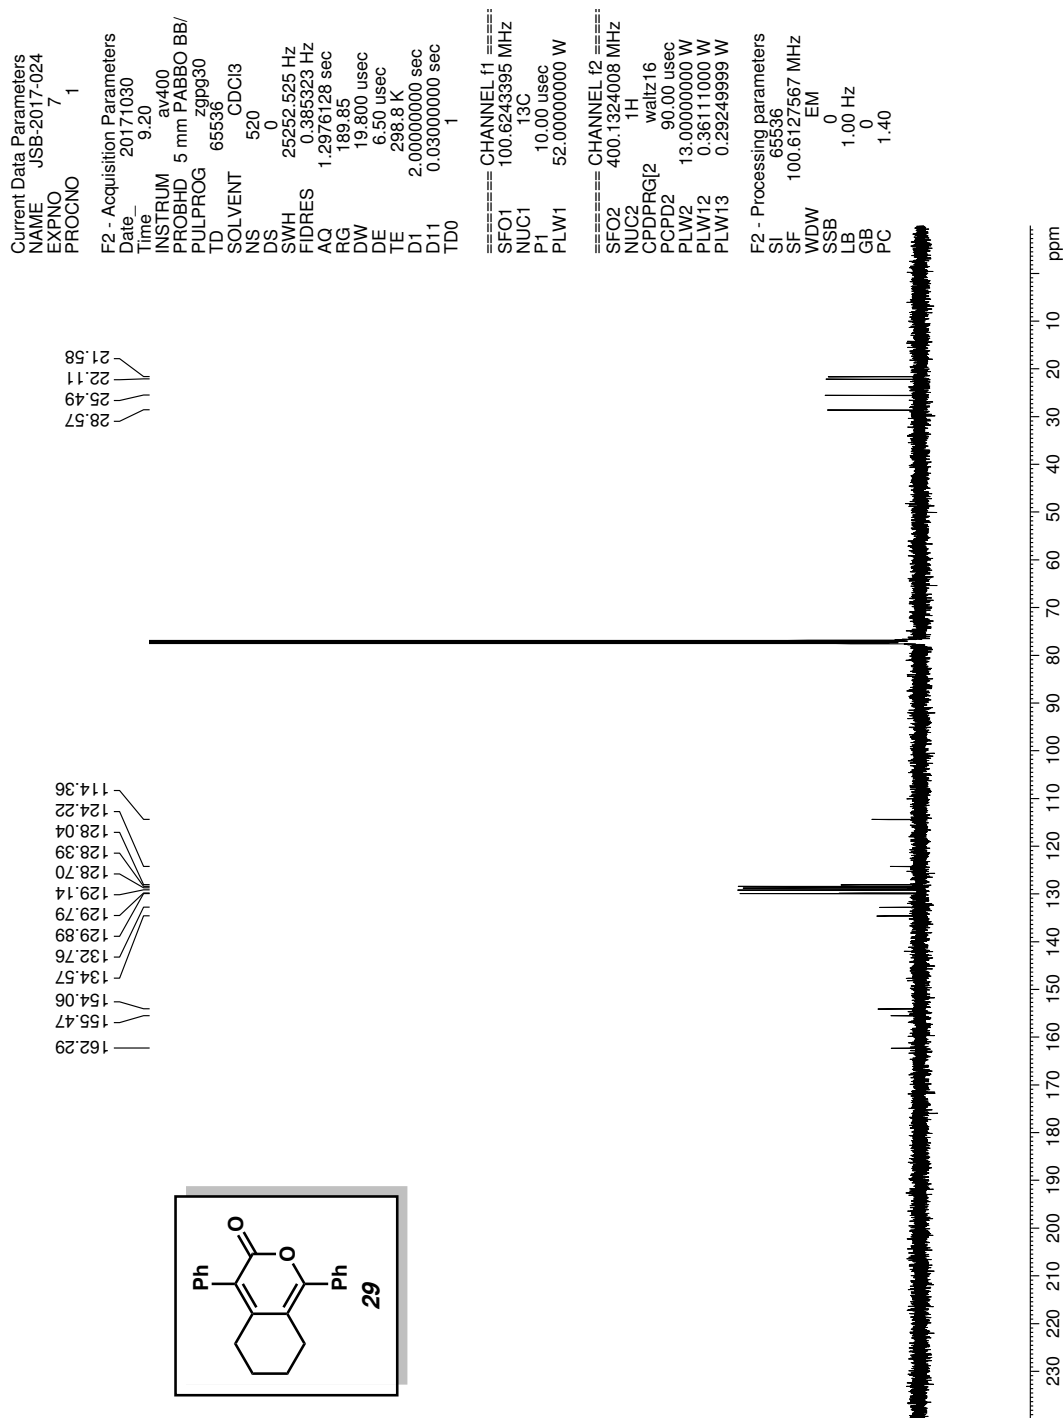



Current Data Parameters  
 NAME MR-2020-081-f9-28-c  
 EXPNO 2  
 PROCNO 1

F2 - Acquisition Parameters  
 Date\_ 20200701  
 Time 18.58 h  
 INSTRUM av500  
 PROBHD Z119248\_0002 (  
 PULPROG zgpg30  
 TD 65536  
 SOLVENT CDCl3  
 NS 13  
 DS 2  
 SWH 31250.000 Hz  
 FIDRES 0.953674 Hz  
 AQC 1.0485760 sec  
 RG 204.54  
 DW 16.000 usec  
 DE 28.00 usec  
 TE 298.0 K  
 D1 2.0000000 sec  
 D11 0.03000000 sec  
 TD0 1  
 SFO1 125.7722511 MHz  
 NUC1 13C  
 P1 10.50 usec  
 PLW1 23.0000000 W  
 SFO2 500.1330008 MHz  
 NUC2 1H  
 CPDPRG2 waltz16  
 PCPD2 80.00 usec  
 PLW2 13.5000000 W  
 PLW12 0.21094000 W  
 PLW13 0.10610000 W

F2 - Processing parameters  
 SI 130.72  
 SF 125.7577730 MHz  
 WDW EM  
 SSB 0  
 LB 1.00 Hz  
 GB 0  
 PC 1.40

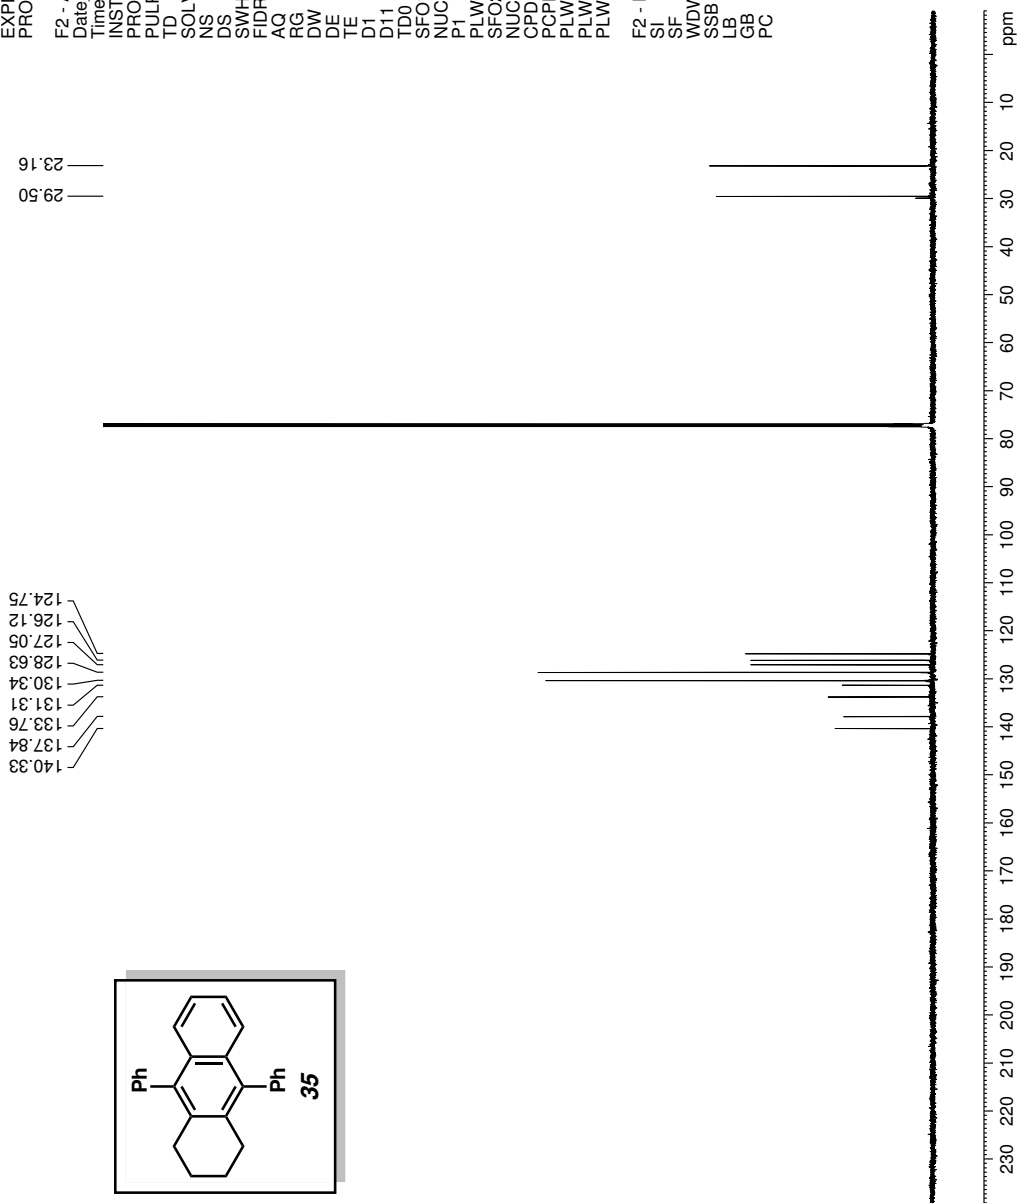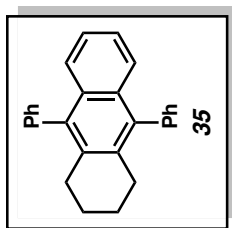

Current Data Parameters  
 NAME MR-2018-128-04-13C  
 EXPNO 1  
 PROCNO 1

F2 - Acquisition Parameters  
 Date\_ 20190120  
 Time 13:22 h  
 INSTRUM av500  
 PROBHD Z119248\_0002 (  
 PULPROG zgpg30  
 TD 65536  
 SOLVENT CDCl3  
 NS 50  
 DS 2  
 SWH 31250.000 Hz  
 FIDRES 0.953674 Hz  
 AQC 1.0485760 sec  
 RG 204.54  
 DW 16.000 usec  
 DE 28.00 usec  
 TE 298.0 K  
 D1 2.00000000 sec  
 D11 0.03000000 sec  
 TD0 1  
 SFO1 125.7722511 MHz  
 NUC1 13C  
 P1 10.50 usec  
 PLW1 23.0000000 W  
 SFO2 500.1330008 MHz  
 NUC2 1H  
 CPDPRG2 waltz16  
 PCPD2 80.00 usec  
 PLW2 13.5000000 W  
 PLW12 0.21094000 W  
 PLW13 0.10610000 W

F2 - Processing parameters  
 SI 131072  
 SF 125.7577892 MHz  
 WDW EM  
 SSB 0  
 LB 1.00 Hz  
 GB 0  
 PC 1.40

22.84  
 23.35  
 29.73  
 30.12

124.81  
 125.34  
 125.35  
 126.36  
 126.96  
 127.02  
 127.14  
 128.23  
 128.25  
 128.62  
 129.50  
 129.95  
 130.24  
 130.31  
 130.31  
 130.75  
 133.12  
 134.31  
 135.48  
 138.58  
 139.16  
 140.84  
 144.12

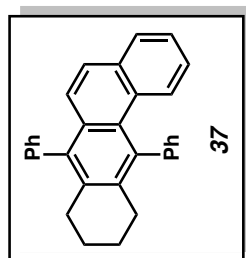

230 220 210 200 190 180 170 160 150 140 130 120 110 100 90 80 70 60 50 40 30 20 10 ppm

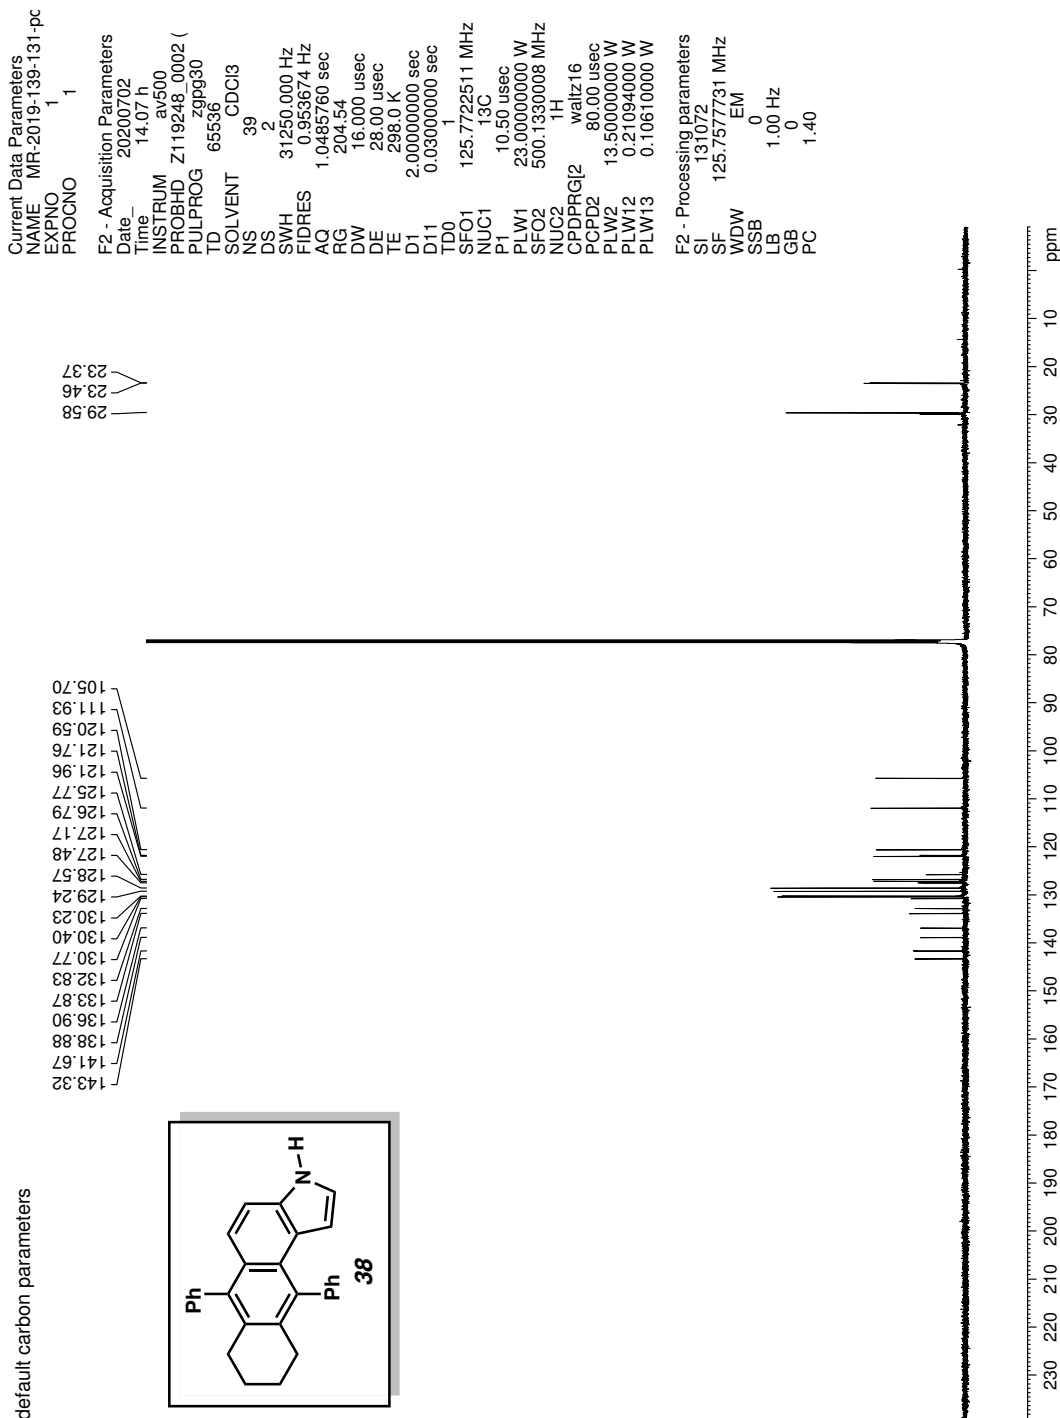

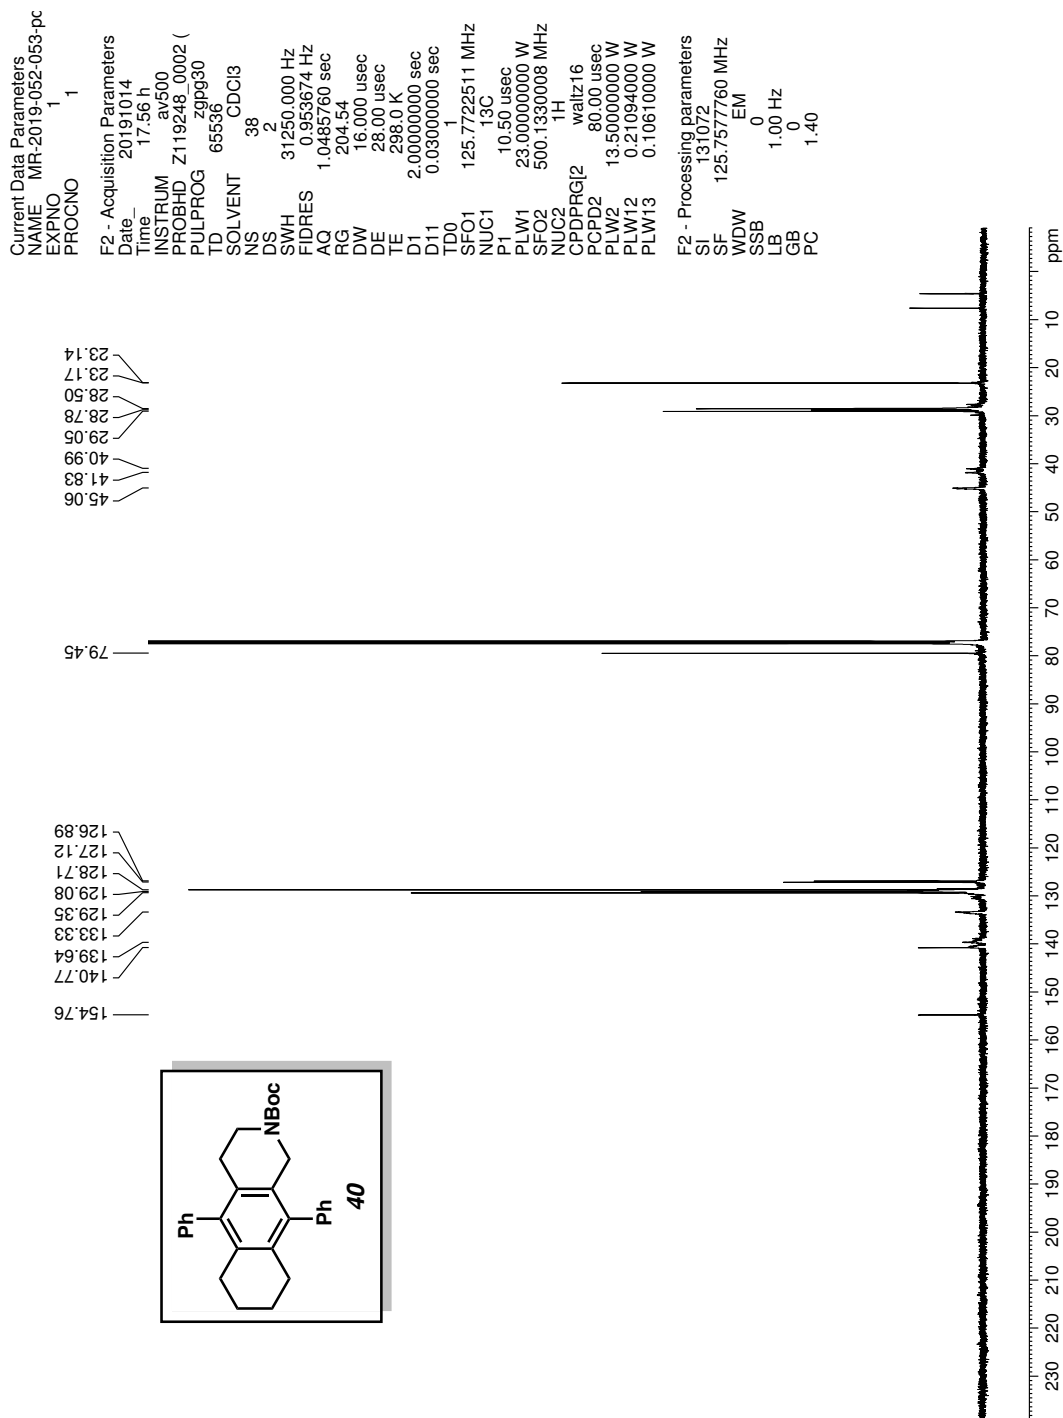



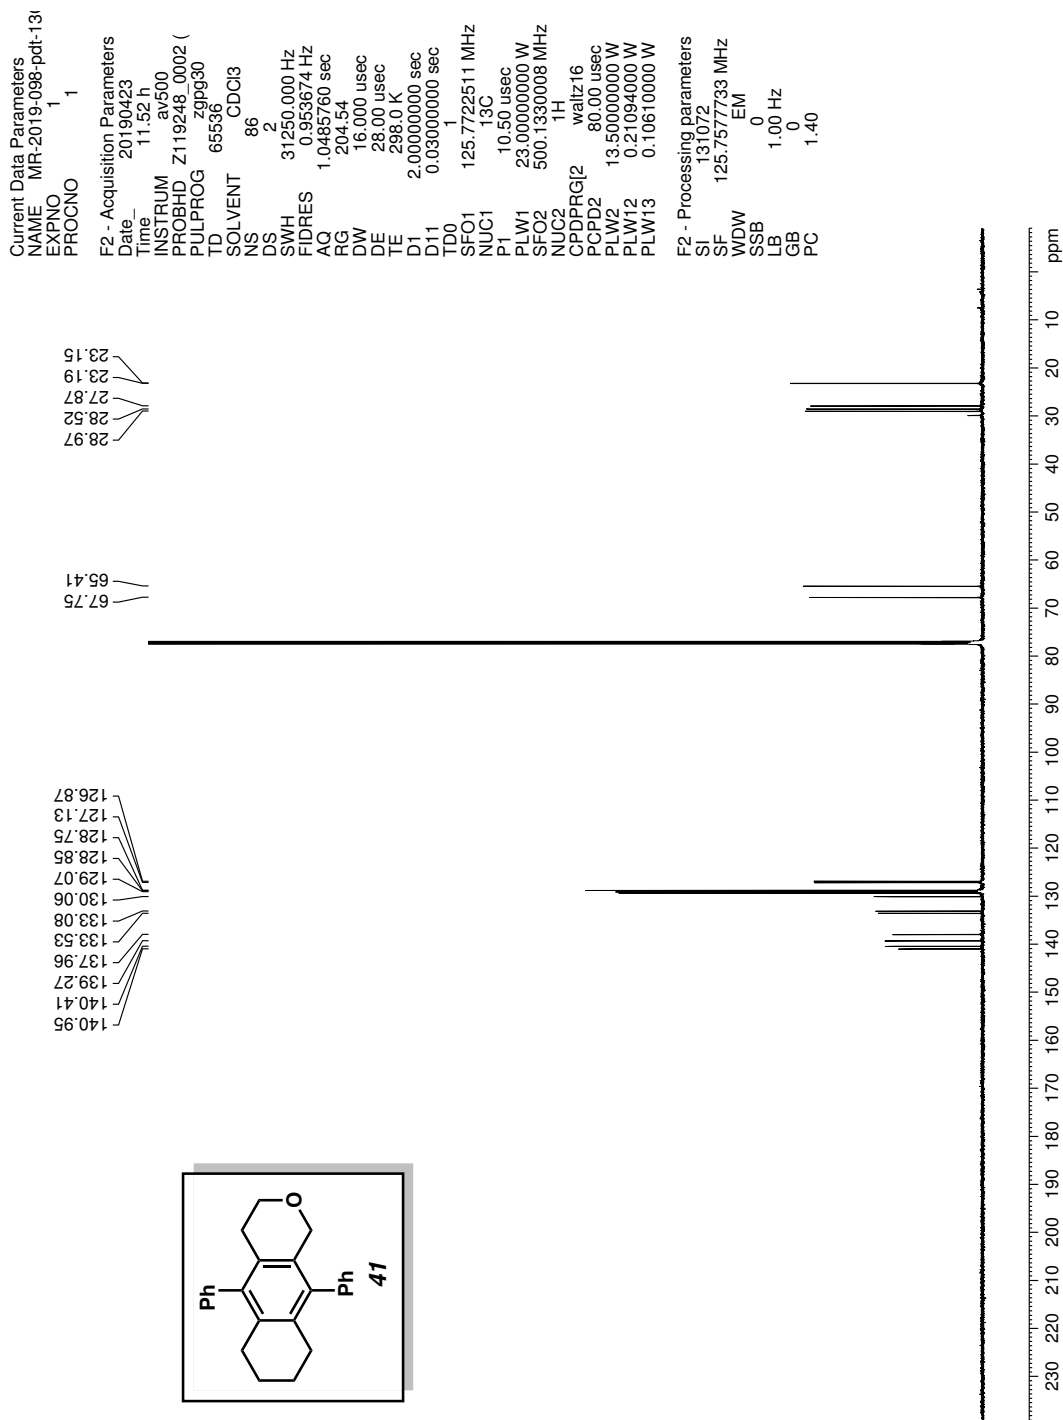

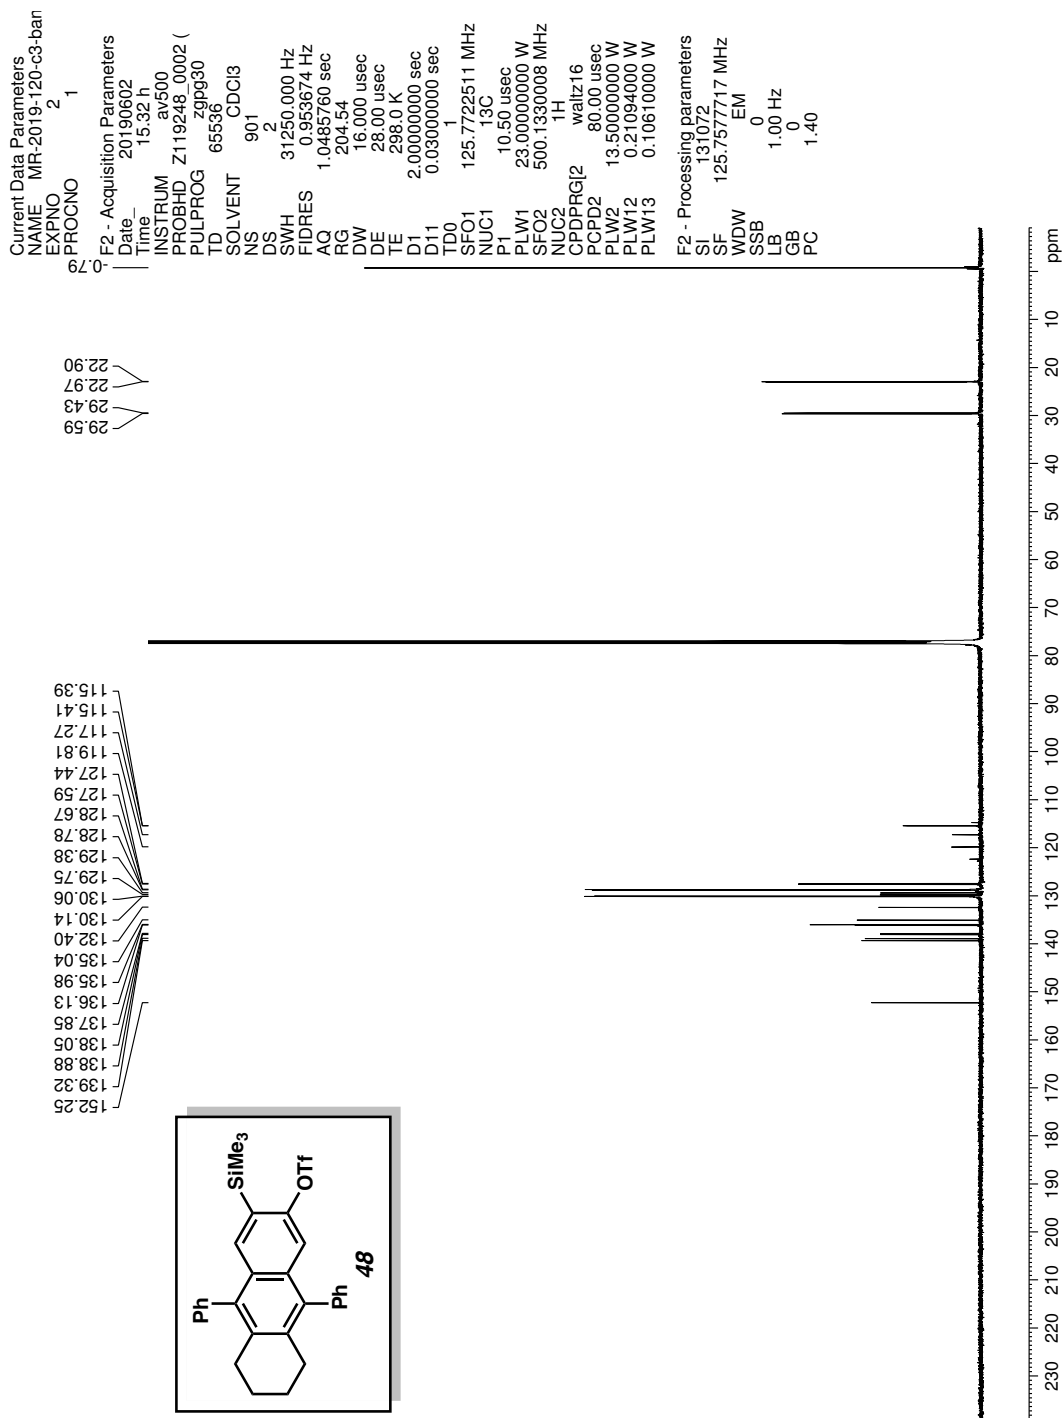

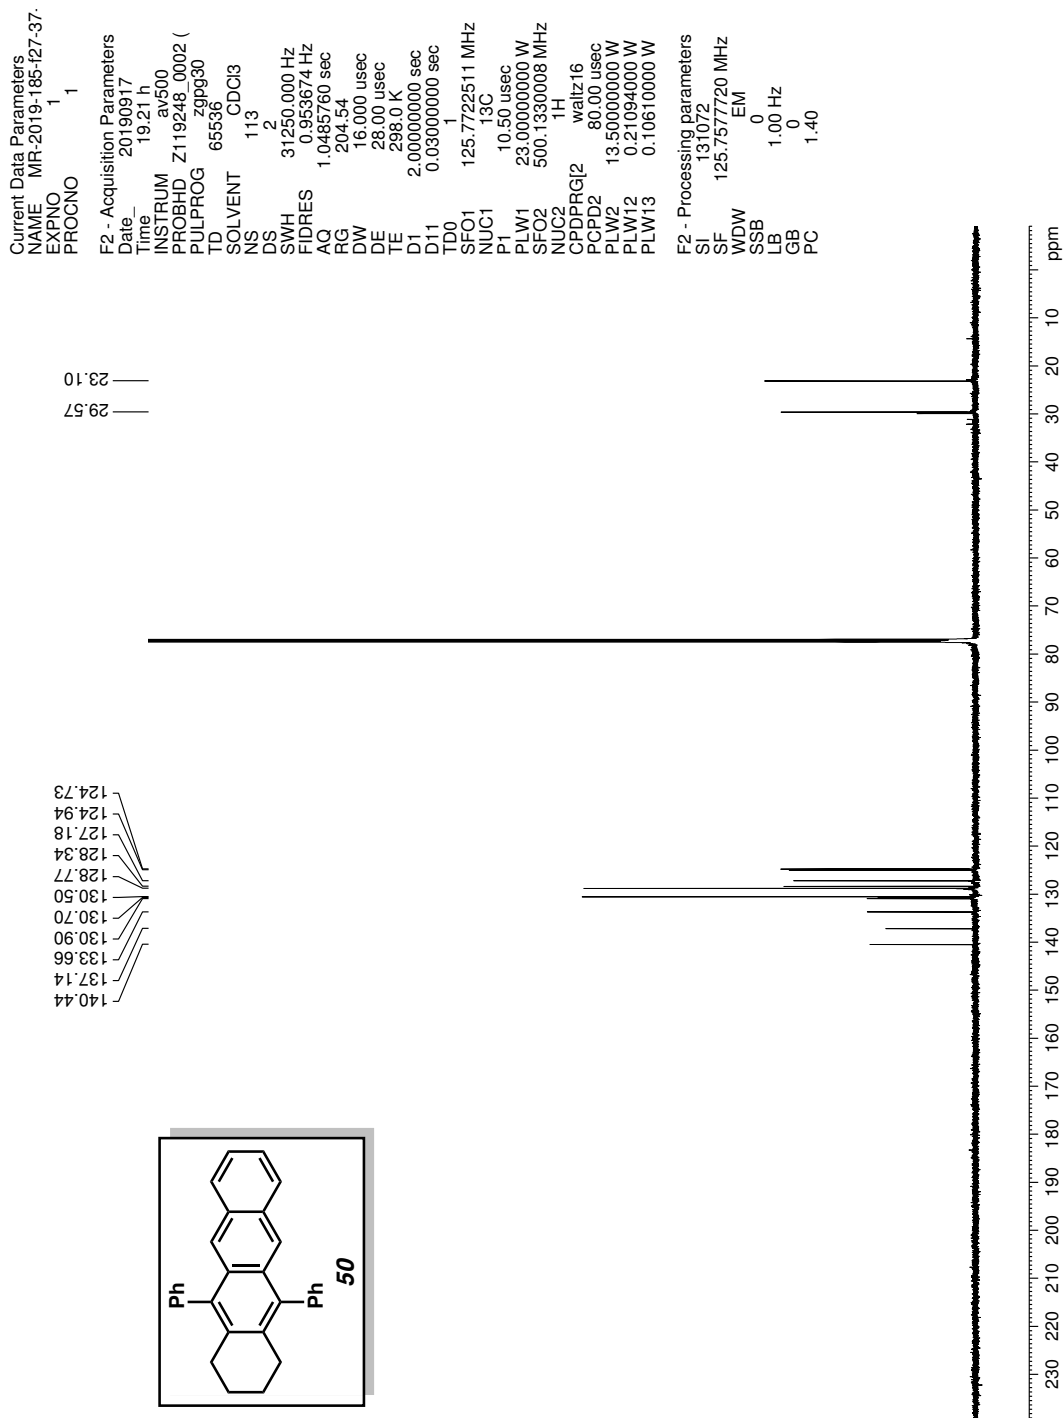

Current Data Parameters  
 NAME MR-2019-181-c2-f21-  
 EXPNO 1  
 PROCNO 1

F2 - Acquisition Parameters

Date\_ 20200702  
 Time\_ 17.25 h  
 INSTRUM av500  
 PROBHD Z119248\_0002 (  
 PULPROG zgpg30  
 TD 65536  
 SOLVENT CD2Cl2  
 NS 62  
 DS 2  
 SWH 31250.000 Hz  
 FIDRES 0.953674 Hz  
 AQ 1.0485760 sec  
 RG 204.54  
 DW 16.000 usec  
 DE 28.00 usec  
 TE 298.0 K  
 D1 2.0000000 sec  
 D11 0.0300000 sec  
 TD0 1  
 SFO1 125.7722511 MHz  
 NUC1 13C  
 P1 10.50 usec  
 PLW1 23.0000000 W  
 SFO2 500.1330008 MHz  
 NUC2 1H  
 CPDPRG2 waltz16  
 PCPD2 80.00 usec  
 PLW2 13.5000000 W  
 PLW12 0.21094000 W  
 PLW13 0.10610000 W

F2 - Processing parameters

SI 131072  
 SF 125.7577372 MHz  
 WDW EM  
 SSB 0  
 LB 1.00 Hz  
 GB 0  
 PC 1.40

140.16  
 137.27  
 133.28  
 130.45  
 130.05  
 128.43  
 126.85  
 123.45

29.58  
 23.31

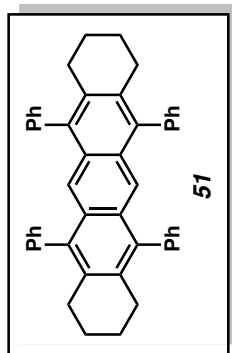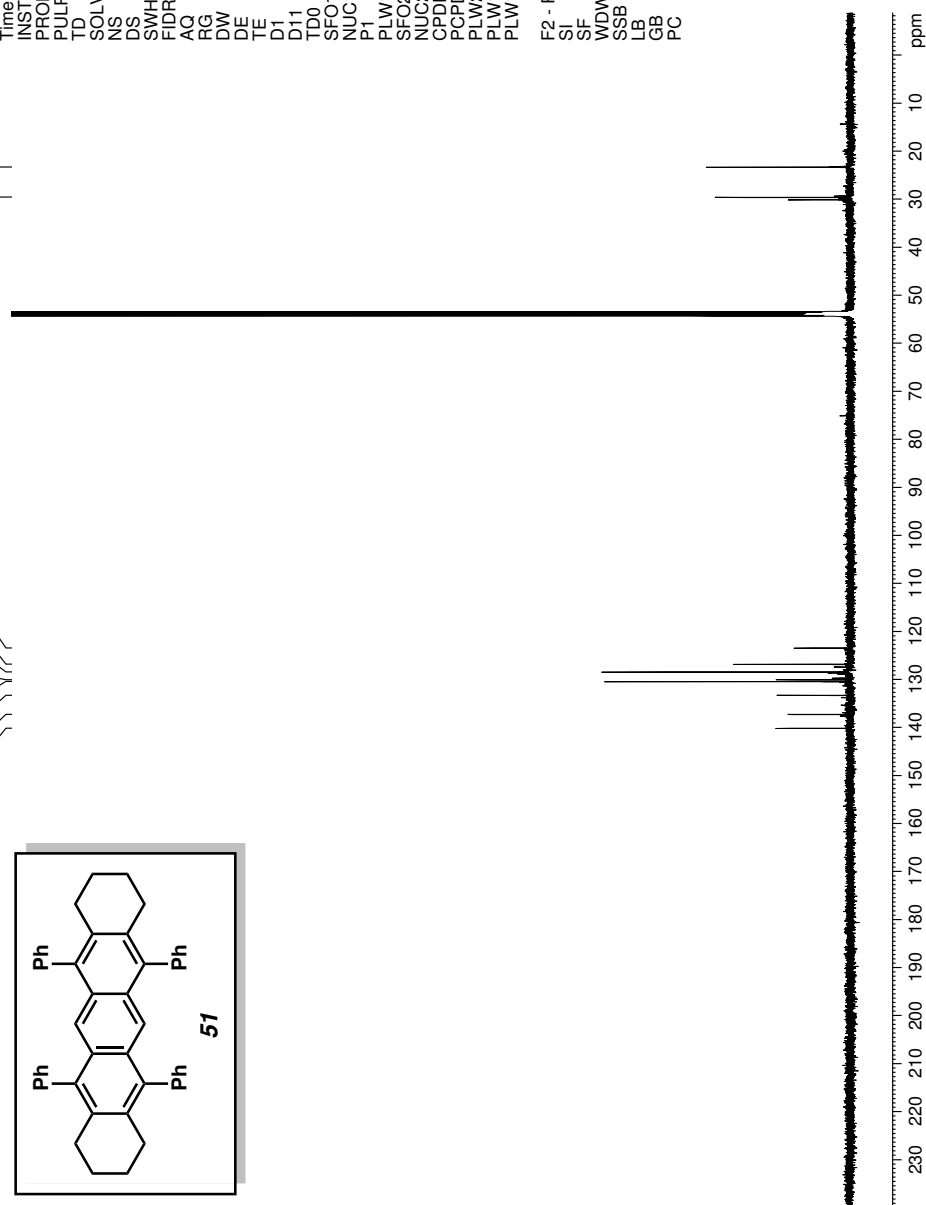

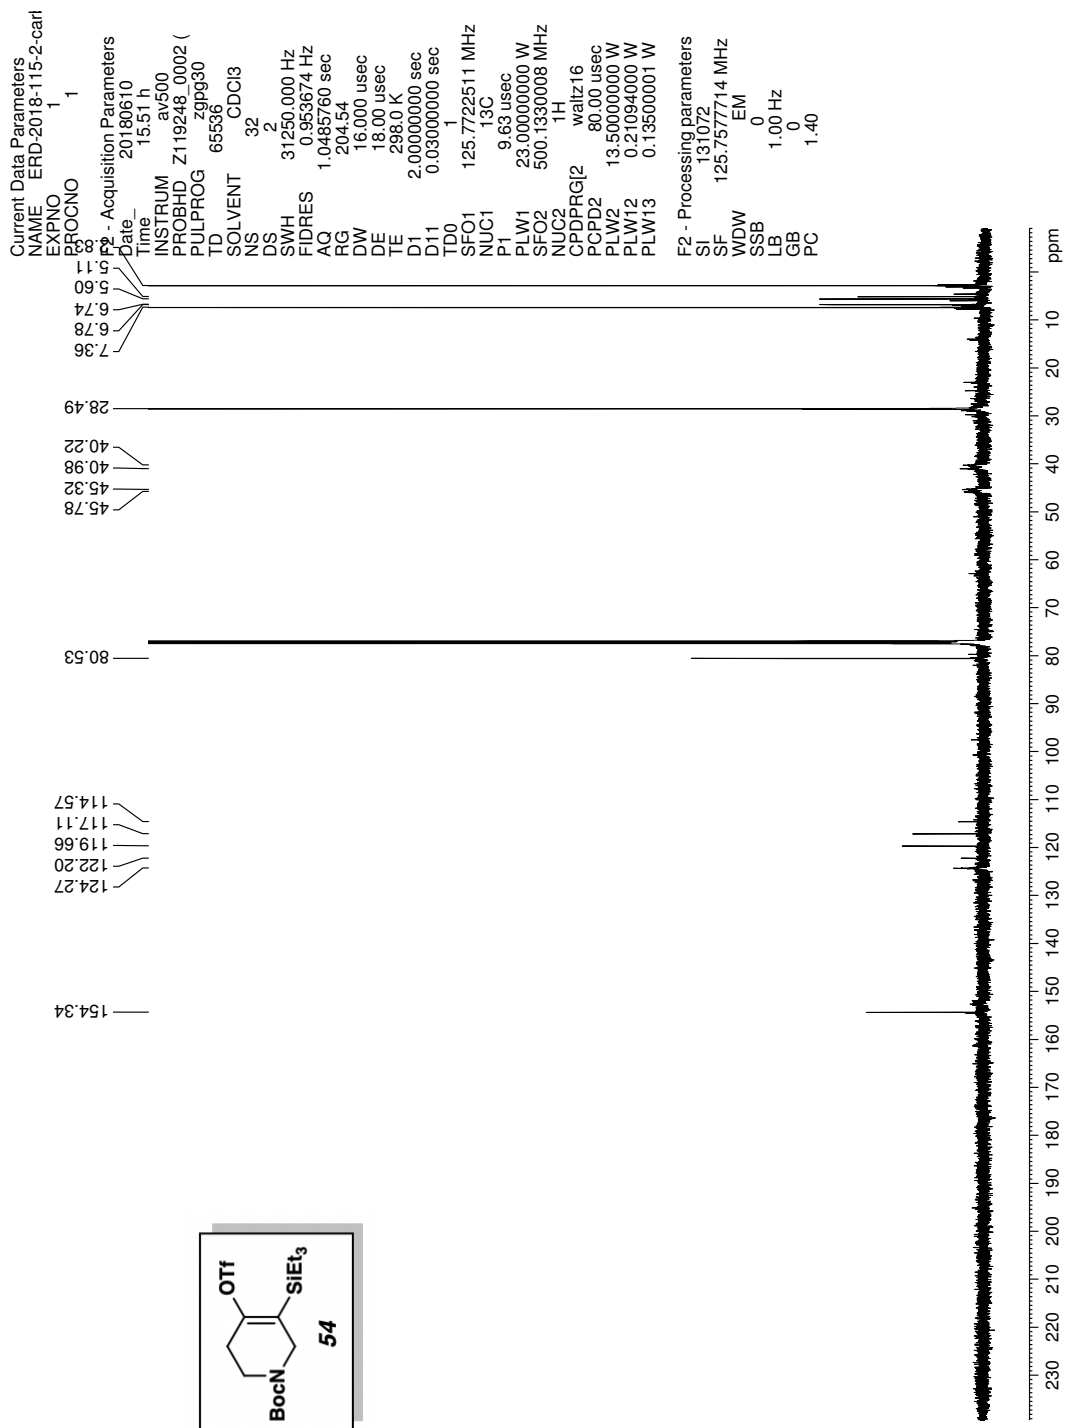

```

Current Data Parameters
NAME      JSB-2017-052
EXPNO     7
PROCNO    1

F2 - Acquisition Parameters
Date_     20171030
Time      19.13
INSTRUM   av400
PROBHD    5 mm PABBO BB/
PULPROG   zgpg30
TD         65536
SOLVENT   CDCl3
NS         520
DS         0
SWH        25252.525 Hz
FIDRES     0.385323 Hz
AQ         1.2976128 sec
RG         189.85
DW         19.800 usec
DE         6.50 usec
TE         298.9 K
D1         2.00000000 sec
D11        0.03000000 sec
TD0        1

===== CHANNEL f1 =====
SFO1      100.6243395 MHz
NUC1       13C
P1         10.00 usec
PLW1      52.00000000 W

===== CHANNEL f2 =====
SFO2      400.1324008 MHz
NUC2       1H
CPDPRG2   waltz16
PCPD2     90.00 usec
PLW2     13.00000000 W
PLW12    0.36110000 W
PLW13    0.29249999 W

F2 - Processing parameters
SI         65536
SF        100.6127566 MHz
WDW        EM
SSB        0
LB         1.00 Hz
GB         0
PC         1.40
    
```

21.70  
22.43  
26.04  
29.55

112.97  
124.03  
127.64  
128.06  
128.70  
129.05  
129.48  
129.89  
134.62  
134.97  
150.56  
153.78  
161.28

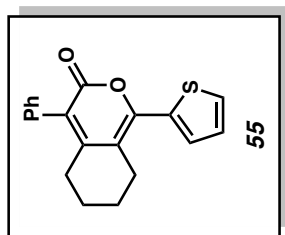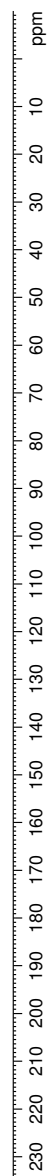

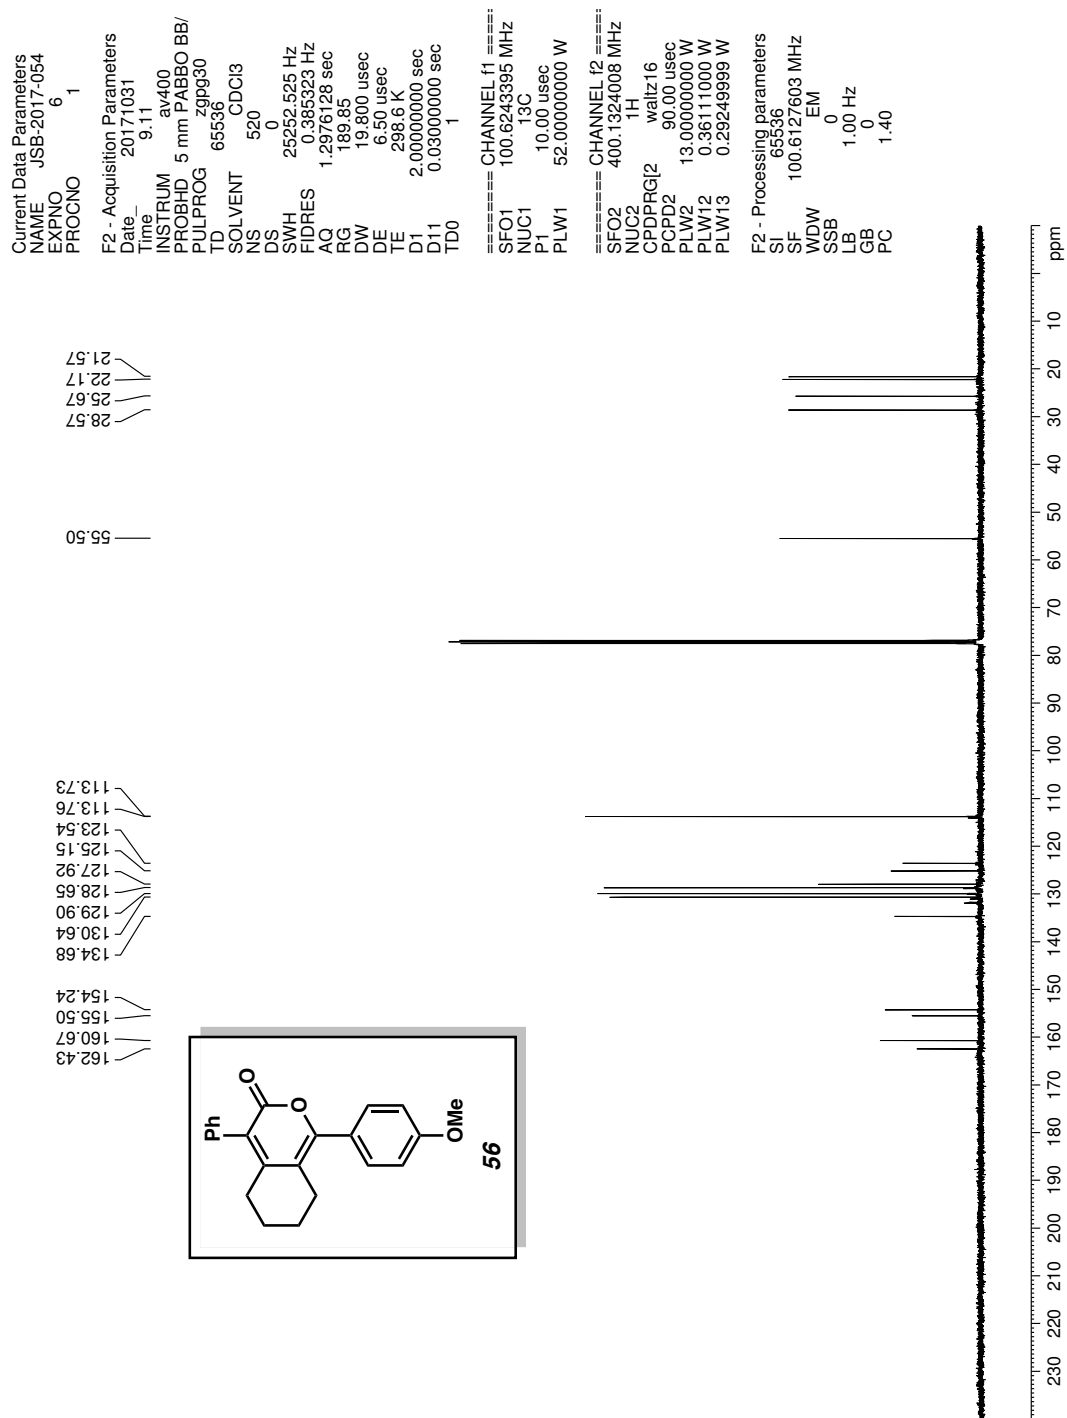

```

Current Data Parameters
NAME      JSB-2017-055
EXPNO    6
PROCNO   1

F2 - Acquisition Parameters
Date_    20171031
Time     20.50
INSTRUM  zgpg30
PROBHD   5 mm PABBO BB/
PULPROG  zgpg30
TD        65536
SOLVENT  CDCl3
NS        500
DS        0
SWH       25252.525 Hz
FIDRES    0.385323 Hz
AQ         1.2976128 sec
RG         189.85
DW         19.800 usec
DE         6.50 usec
TE         298.9 K
D1         2.00000000 sec
D11        0.03000000 sec
TD0        1

===== CHANNEL f1 =====
SFO1      100.6243395 MHz
NUC1       13C
P1         10.00 usec
PLW1      52.00000000 W

===== CHANNEL f2 =====
SFO2      400.1324008 MHz
NUC2       1H
CPDPRG2   waltz16
PCPD2     90.00 usec
PLW2      13.00000000 W
PLW12     0.3611000 W
PLW13     0.29249999 W

F2 - Processing parameters
SI         65536
SF         100.6127580 MHz
WDW        EM
SSB        0
LB         1.00 Hz
GB         0
PC         1.40
    
```

21.50  
22.03  
25.52  
28.53

114.70  
124.22  
124.61  
128.13  
128.73  
129.79  
130.66  
131.57  
131.68  
131.68  
134.37  
153.92  
154.17  
162.00

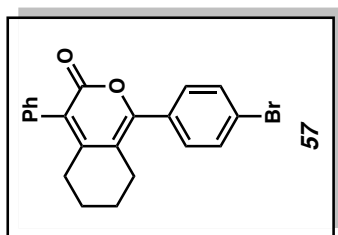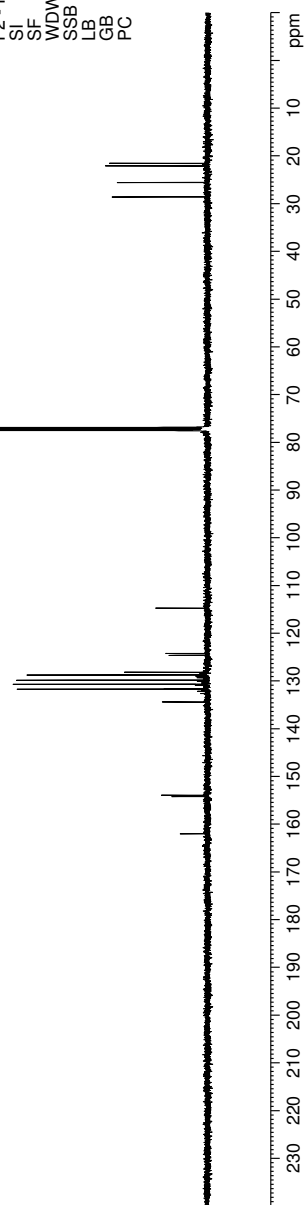



Current Data Parameters  
 NAME JSB-2018-014-06252  
 EXPNO 1  
 PROCNO 1  
 F2 - Acquisition Parameters  
 Date\_ 20200625  
 Time 18:30 h  
 INSTRUM av500  
 PROBHD Z119248\_0002 (  
 PULPROG zgpg30  
 TD 65536  
 SOLVENT CDCl3  
 NS 107  
 DS 2  
 SWH 31250.000 Hz  
 FIDRES 0.953674 Hz  
 AQ 1.0485760 sec  
 RG 204.54  
 DW 16.000 usec  
 DE 28.00 usec  
 TE 298.0 K  
 D1 2.00000000 sec  
 D11 0.03000000 sec  
 TD0 1  
 SFO1 125.7722511 MHz  
 NUC1 13C  
 P1 10.50 usec  
 PLW1 23.00000000 W  
 SFO2 500.1330008 MHz  
 NUC2 1H  
 CPDPRG2 waltz16  
 PCPD2 80.00 usec  
 PLW2 13.50000000 W  
 PLW12 0.21094000 W  
 PLW13 0.10610000 W  
 F2 - Processing parameters  
 SI 131072  
 SF 125.7577747 MHz  
 WDW EM  
 SSB 0  
 LB 1.00 Hz  
 GB 0  
 PC 1.40

21.35  
 21.88  
 25.54  
 28.50

116.23  
 123.65  
 125.75  
 128.35  
 128.79  
 129.66  
 130.11  
 133.96  
 138.58  
 148.18  
 152.46  
 153.68  
 161.56

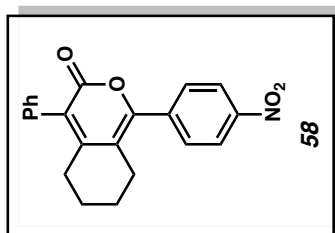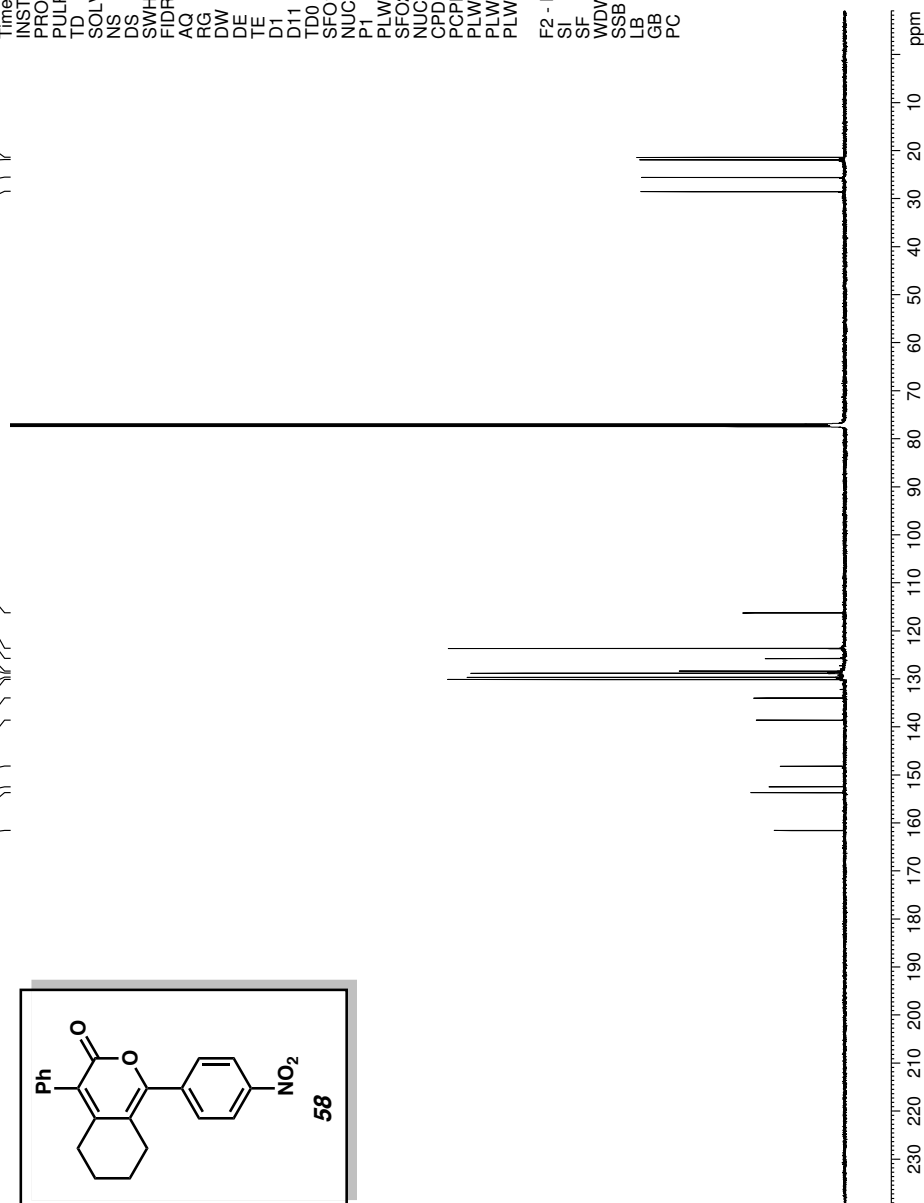

Current Data Parameters  
 NAME JSB-2018-019-06252  
 EXPNO 1  
 PROCNO 1

F2 - Acquisition Parameters  
 Date\_ 20200625  
 Time 18.54 h  
 INSTRUM av500  
 PROBHD Z119248\_0002 (  
 PULPROG zgpg30  
 TD 65536  
 SOLVENT CDCl3  
 NS 356  
 DS 2  
 SWH 31250.000 Hz  
 FIDRES 0.953674 Hz  
 AQ 1.0485760 sec  
 RG 204.54  
 DW 16.000 usec  
 DE 28.00 usec  
 TE 298.0 K  
 D1 2.0000000 sec  
 D11 0.03000000 sec  
 TD0 1  
 SFO1 125.7722511 MHz  
 NUC1 13C  
 P1 10.50 usec  
 PLW1 23.00000000 W  
 SFO2 500.1330008 MHz  
 NUC2 1H  
 CPDPRG2 waltz16  
 PCPD2 80.00 usec  
 PLW2 13.50000000 W  
 PLW12 0.21094000 W  
 PLW13 0.10610000 W

F2 - Processing parameters  
 SI 130.72  
 SF 125.7577728 MHz  
 WDW EM  
 SSB 0  
 LB 1.00 Hz  
 GB 0  
 PC 1.40

29.46  
 29.37  
 23.11  
 23.05

140.51  
 140.08  
 139.10  
 136.69  
 133.72  
 132.60  
 131.25  
 130.16  
 129.87  
 128.67  
 127.91  
 127.32  
 127.16  
 126.10  
 126.05  
 125.85  
 125.20  
 124.98

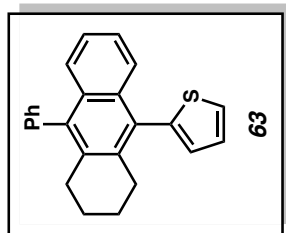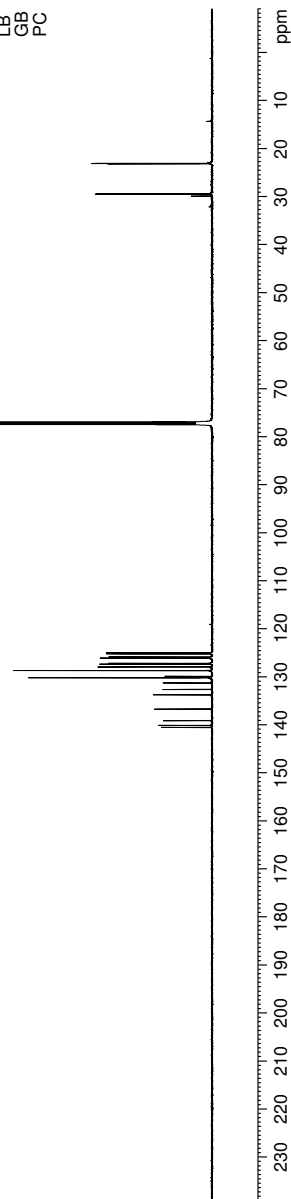

Current Data Parameters  
 NAME MR-2018-088-f21-26  
 EXPNO 1  
 PROCNO 1  
 F2 - Acquisition Parameters  
 Date\_ 20181008  
 Time 15:56 h  
 INSTRUM av500  
 PROBD Z119248\_0002 (  
 PULPROG zgpg30  
 TD 65536  
 SOLVENT CDCl3  
 NS 260  
 DS 2  
 SWH 31250.000 Hz  
 FIDRES 0.953674 Hz  
 AQC 1.0485760 sec  
 RG 17.16  
 DW 16.000 usec  
 DE 18.00 usec  
 TE 298.0 K  
 D1 2.0000000 sec  
 D11 0.03000000 sec  
 TD0 1  
 SFO1 125.7722511 MHz  
 NUC1 13C  
 P1 10.50 usec  
 PLW1 23.00000000 W  
 SFO2 500.1330008 MHz  
 NUC2 1H  
 CPDPRG2 waltz16  
 PCPD2 80.00 usec  
 PLW2 13.50000000 W  
 PLW12 0.21094000 W  
 PLW13 0.10610000 W  
 F2 - Processing parameters  
 SI 130.72  
 SF 125.7577731 MHz  
 WDW EM  
 SSB 0  
 LB 1.00 Hz  
 GB 0  
 PC 1.40

23.17  
 23.19  
 29.50  
 29.55  
 55.44

114.05  
 124.70  
 126.11  
 126.17  
 127.03  
 128.62  
 130.34  
 131.33  
 131.36  
 131.68  
 131.68  
 132.39  
 133.76  
 134.19  
 137.52  
 137.72  
 140.37  
 158.69

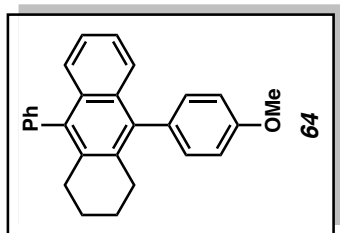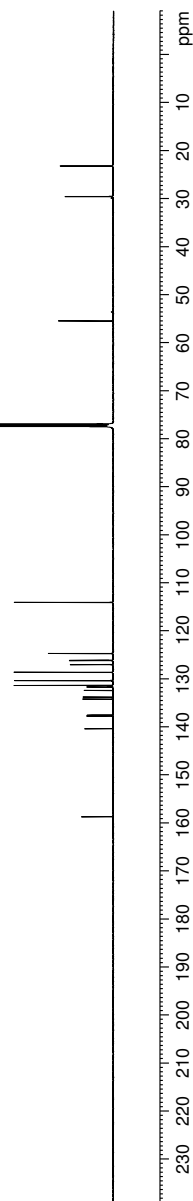

Current Data Parameters  
 NAME JSB-2017-073-13C-1  
 EXPNO 1  
 PROCNO 1

F2 - Acquisition Parameters  
 Date\_ 20191014  
 Time 17:49 h  
 INSTRUM av500  
 PROBHD Z119248\_0002 (  
 PULPROG zgpg30  
 TD 65536  
 SOLVENT CDCl3  
 NS 74  
 DS 2  
 SWH 31250.000 Hz  
 FIDRES 0.959674 Hz  
 AQ 1.0486760 sec  
 RG 204.54  
 DW 16.000 usec  
 DE 28.00 usec  
 TE 298.0 K  
 D1 2.0000000 sec  
 D11 0.0300000 sec  
 TD0 1  
 SFO1 125.772511 MHz  
 NUC1 13C  
 P1 10.50 usec  
 PLW1 23.0000000 W  
 SFO2 500.1330008 MHz  
 NUC2 1H  
 CPDPRG2 waltz16  
 PCPD2 80.00 usec  
 PLW2 13.5000000 W  
 PLW12 0.21094000 W  
 PLW13 0.10610000 W

F2 - Processing parameters  
 SI 131072  
 SF 125.7577892 MHz  
 MIDW EM  
 SSB 0  
 LB 1.00 Hz  
 GB 0  
 PC 1.40

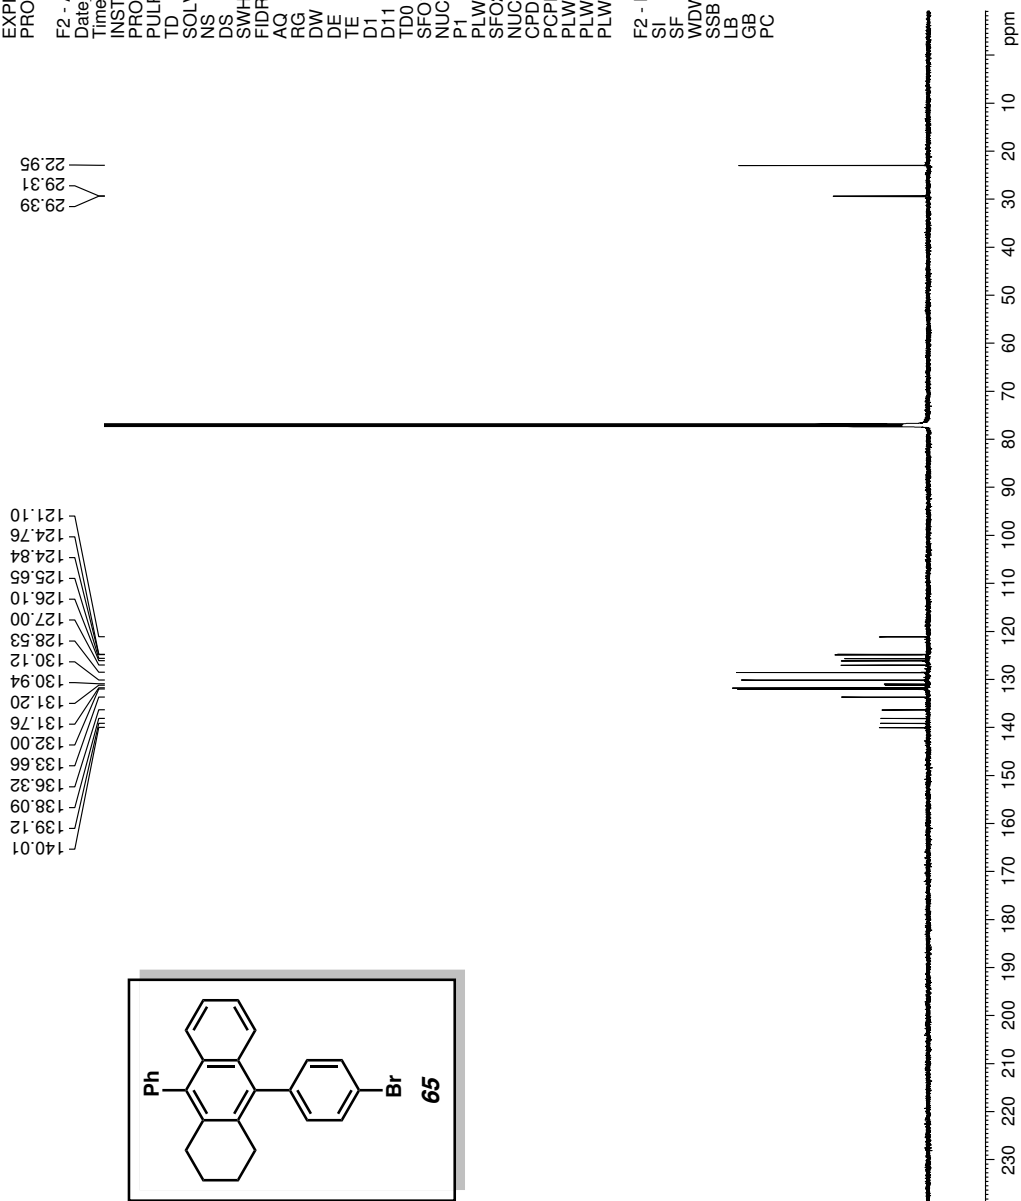

Current Data Parameters  
 NAME JSB-2018-016-06252  
 EXPNO 1  
 PROCNO 1

F2 - Acquisition Parameters

Date 20200625

Time 16.30 h

INSTRUM av500

PROBHD Z119248\_0002 (

PULPROG zgpg30

TD 65536

SOLVENT CDCl3

NS 190

DS 2

SWH 31250.000 Hz

FIDRES 0.959674 Hz

AQ 1.0485760 sec

RG 204.54

DW 16.000 usec

DE 28.00 usec

TE 298.0 K

D1 2.00000000 sec

TD0 1

SFO1 125.7722511 MHz

NUC1 13C

P1 10.50 usec

PLW1 23.0000000 W

SFO2 500.1330008 MHz

NUC2 1H

CPDPRG2 waltz16

PCPD2 80.00 usec

PLW2 13.5000000 W

PLW12 0.21094000 W

PLW13 0.10610000 W

F2 - Processing parameters

SI 131072

SF 125.7577892 MHz

WDW EM

SSB 0

LB 1.00 Hz

GB 0

PC 1.00

22.84  
 22.85  
 29.25  
 29.41  
 29.71

123.87  
 125.01  
 125.12  
 125.21  
 126.32  
 127.14  
 128.60  
 130.01  
 130.40  
 131.24  
 131.37  
 133.41  
 133.71  
 135.26  
 138.79  
 139.73  
 147.17  
 147.80

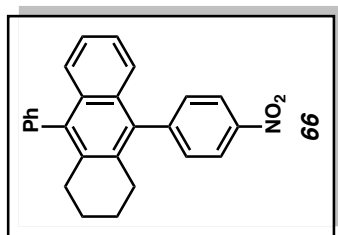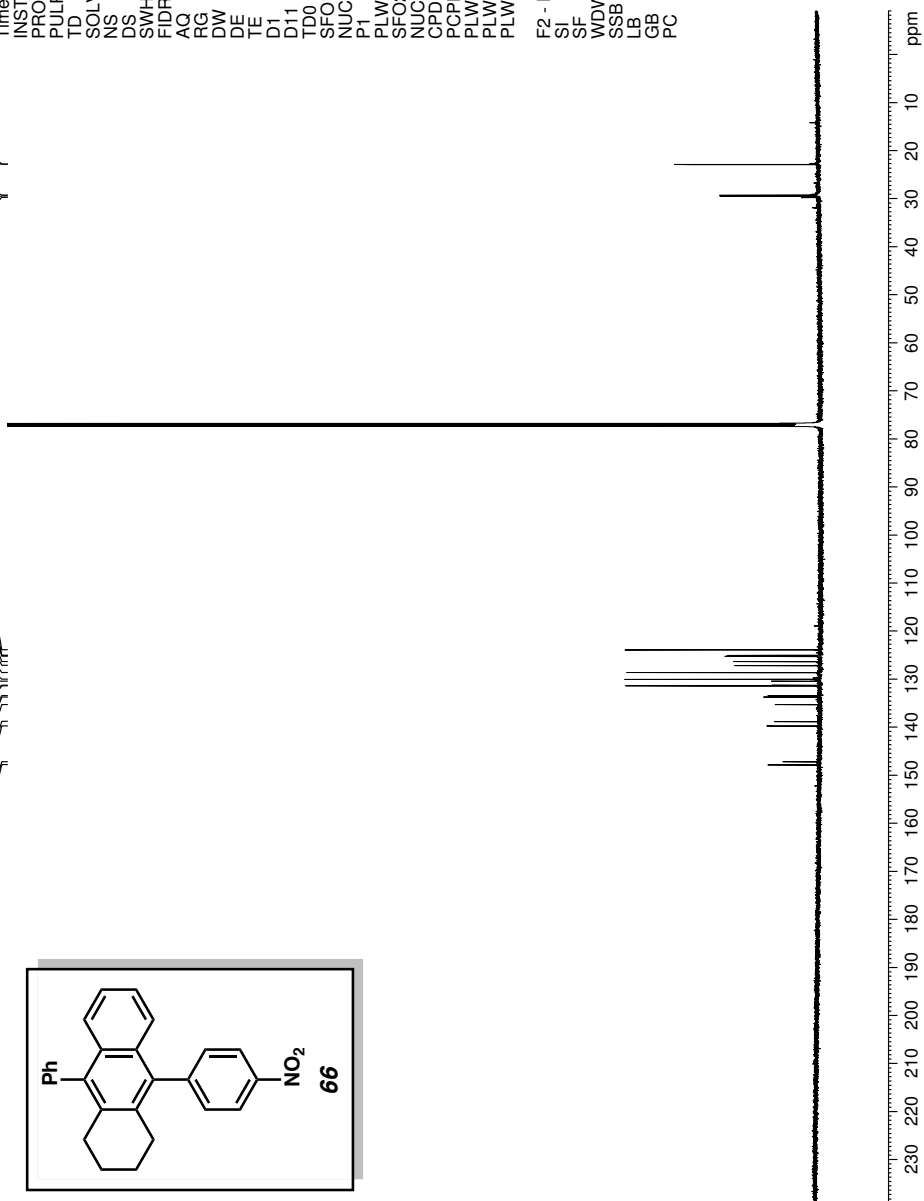

Current Data Parameters  
 NAME MR-2019-124-125-b8  
 EXPNO 1  
 PROCNO 1

F2 - Acquisition Parameters  
 Date\_ 20190618  
 Time 21.51 h  
 INSTRUM av500  
 PROBHD Z119248\_0002 (  
 PULPROG zgpg30  
 TD 65536  
 SOLVENT CD2Cl2  
 NS 3034  
 DS 2  
 SWH 31250.000 Hz  
 FIDRES 0.953674 Hz  
 AQC 1.0485760 sec  
 RG 204.54  
 DW 16.000 usec  
 DE 28.00 usec  
 TE 298.0 K  
 D1 2.00000000 sec  
 D11 0.03000000 sec  
 TD0 1  
 SFO1 125.7722511 MHz  
 NUC1 <sup>13</sup>C  
 P1 10.50 usec  
 PLW1 23.00000000 W  
 SFO2 500.1330008 MHz  
 NUC2 <sup>1</sup>H  
 CPDPRG2 waltz16  
 PCPD2 80.00 usec  
 PLW2 13.50000000 W  
 PLW12 0.21094000 W  
 PLW13 0.10610000 W

F2 - Processing parameters  
 SI 131072  
 SF 125.7577378 MHz  
 WDW EM  
 SSB 0  
 LB 1.00 Hz  
 GB 0  
 PC 1.40

30.09  
 29.67  
 29.24  
 23.37

142.19  
 140.81  
 140.32  
 139.30  
 137.92  
 136.96  
 133.40  
 132.28  
 130.53  
 129.97  
 129.77  
 129.60  
 128.69  
 128.66  
 128.63  
 127.90  
 127.22  
 126.80  
 119.61

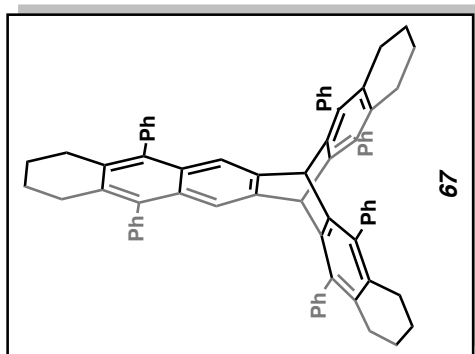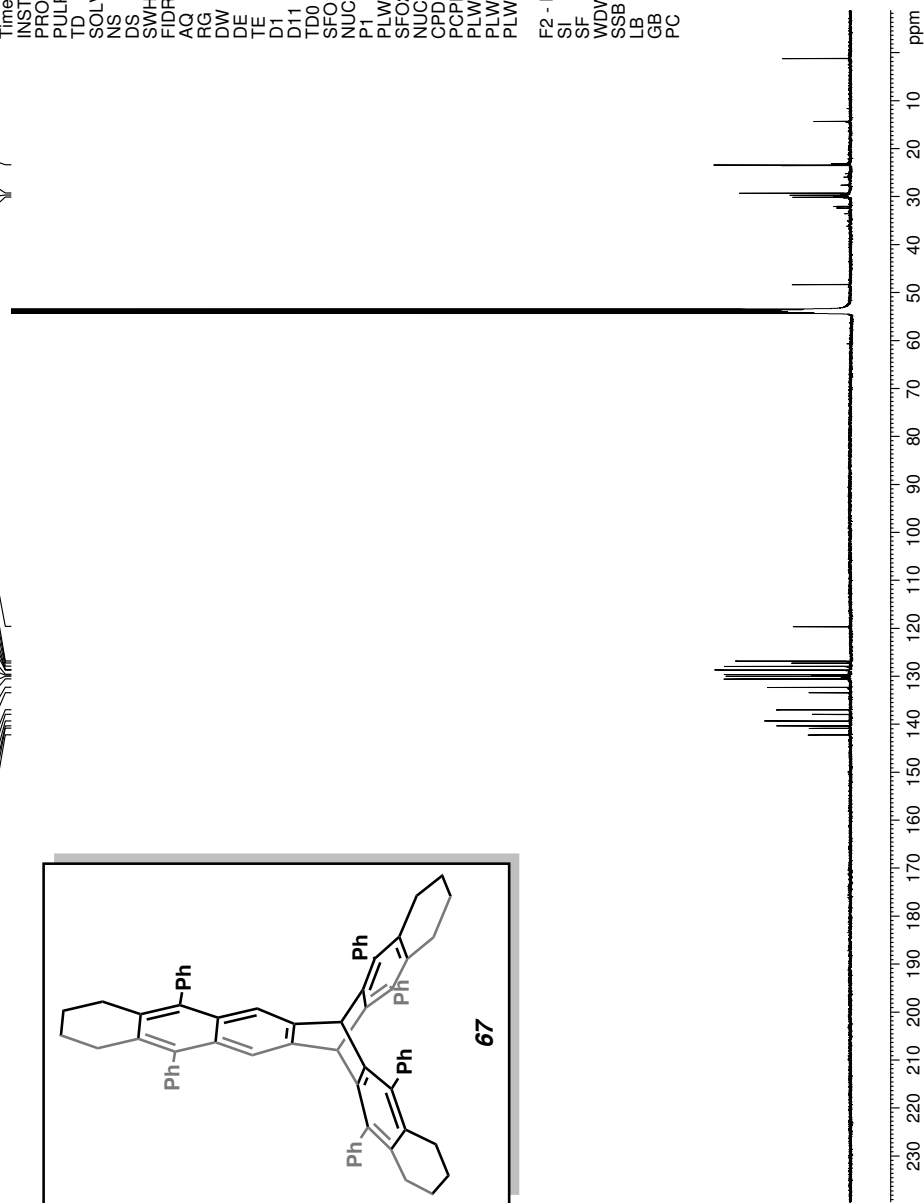

### Crystallographic Information

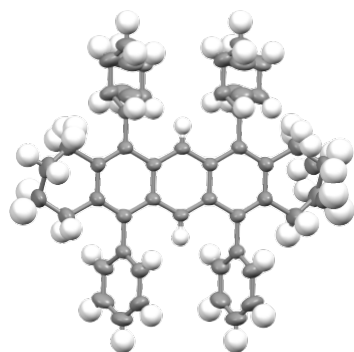

**Figure S2.** ORTEP representation of X-ray crystallographic structure **51** (CCDC Registry #2070892).

**Table S1.** Crystal data and structure refinement for **51**.

|                                 |                                          |                   |
|---------------------------------|------------------------------------------|-------------------|
| Identification code             | cu_garg1906_a                            |                   |
| Empirical formula               | C <sub>46</sub> H <sub>38</sub>          |                   |
| Formula weight                  | 590.76                                   |                   |
| Temperature                     | 298(2) K                                 |                   |
| Wavelength                      | 1.54178 Å                                |                   |
| Crystal system                  | Monoclinic                               |                   |
| Space group                     | P2 <sub>1</sub> /c                       |                   |
| Unit cell dimensions            | a = 11.3930(2) Å                         | a = 90°.          |
|                                 | b = 8.5510(2) Å                          | b = 92.6530(10)°. |
|                                 | c = 17.3991(3) Å                         | g = 90°.          |
| Volume                          | 1693.23(6) Å <sup>3</sup>                |                   |
| Z                               | 2                                        |                   |
| Density (calculated)            | 1.159 Mg/m <sup>3</sup>                  |                   |
| Absorption coefficient          | 0.491 mm <sup>-1</sup>                   |                   |
| F(000)                          | 628                                      |                   |
| Crystal size                    | .2 x .2 x .2 mm <sup>3</sup>             |                   |
| Theta range for data collection | 3.884 to 70.070°.                        |                   |
| Index ranges                    | -13 ≤ h ≤ 13, -10 ≤ k ≤ 10, -20 ≤ l ≤ 21 |                   |

|                                   |                                             |
|-----------------------------------|---------------------------------------------|
| Reflections collected             | 32926                                       |
| Independent reflections           | 3184 [R(int) = 0.0392]                      |
| Completeness to theta = 67.679°   | 100.0 %                                     |
| Absorption correction             | Semi-empirical from equivalents             |
| Max. and min. transmission        | 0.75 and 0.70                               |
| Refinement method                 | Full-matrix least-squares on F <sup>2</sup> |
| Data / restraints / parameters    | 3184 / 279 / 302                            |
| Goodness-of-fit on F <sup>2</sup> | 1.058                                       |
| Final R indices [I > 2sigma(I)]   | R1 = 0.0521, wR2 = 0.1505                   |
| R indices (all data)              | R1 = 0.0664, wR2 = 0.1657                   |
| Extinction coefficient            | n/a                                         |
| Largest diff. peak and hole       | 0.165 and -0.171 e.Å <sup>-3</sup>          |



## Part II: Computational Section

All calculations were carried out with Gaussian 16. Geometry optimizations were performed with M06-2X functional<sup>8</sup> and the 6-31G(d) basis set. Frequency analysis was conducted at the same level of theory as for geometry optimizations to verify the stationary points to be minima or first-order saddle points. Free energy corrections were calculated both with and without Truhlar's quasiharmonic oscillator approximation.<sup>9</sup> Single-point energy calculations were performed with the same functional using a larger 6-311+G(d,p) basis set and the SMD solvent model<sup>10</sup> for acetonitrile to obtain more accurate energetics. HOMO and LUMO energies were computed using M06-2X/6-311+G(d,p). Optimized structures are presented using CYLview.<sup>11</sup>

### A. Complete Citation for Gaussian 16

Frisch, M. J.; Trucks, G. W.; Schlegel, H. B.; Scuseria, G. E.; Robb, M. A.; Cheeseman, J. R.; Scalmani, G.; Barone, V.; Petersson, G. A.; Nakatsuji, H.; Li, X.; Caricato, M.; Marenich, A. V.; Bloino, J.; Janesko, B. G.; Gomperts, R.; Mennucci, B.; Hratchian, H. P.; Ortiz, J. V.; Izmaylov, A. F.; Sonnenberg, J. L.; Williams; Ding, F.; Lipparini, F.; Egidi, F.; Goings, J.; Peng, B.; Petrone, A.; Henderson, T.; Ranasinghe, D.; Zakrzewski, V. G.; Gao, J.; Rega, N.; Zheng, G.; Liang, W.; Hada, M.; Ehara, M.; Toyota, K.; Fukuda, R.; Hasegawa, J.; Ishida, M.; Nakajima, T.; Honda, Y.; Kitao, O.; Nakai, H.; Vreven, T.; Throssell, K.; Montgomery Jr., J. A.; Peralta, J. E.; Ogliaro, F.; Bearpark, M. J.; Heyd, J. J.; Brothers, E. N.; Kudin, K. N.; Staroverov, V. N.; Keith, T. A.; Kobayashi, R.; Normand, J.; Raghavachari, K.; Rendell, A. P.; Burant, J. C.; Iyengar, S. S.; Tomasi, J.; Cossi, M.; Millam, J. M.; Klene, M.; Adamo, C.; Cammi, R.; Ochterski, J. W.; Martin, R. L.; Morokuma, K.; Farkas, O.; Foresman, J. B.; Fox, D. J. *Gaussian 16, Rev. A.03*, Wallingford, CT, 2016.

## B. HOMO and LUMO Energies

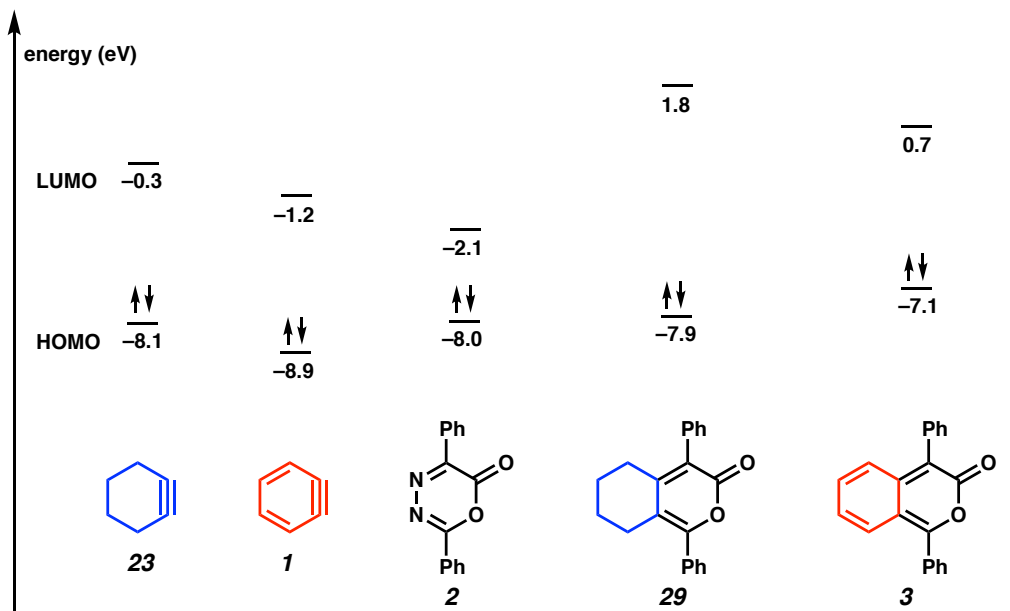

**Figure S3.** HOMO and LUMO energies of cyclohexyne (**23**), benzyne (**1**), oxadiazinone **2**, and pyrones **29** and **3**. Energies calculated with M06-2X/6-311+G(d,p) and in units of kcal mol<sup>-1</sup>.

## C. Transition State Structures and D/IAS Analysis

## DA1

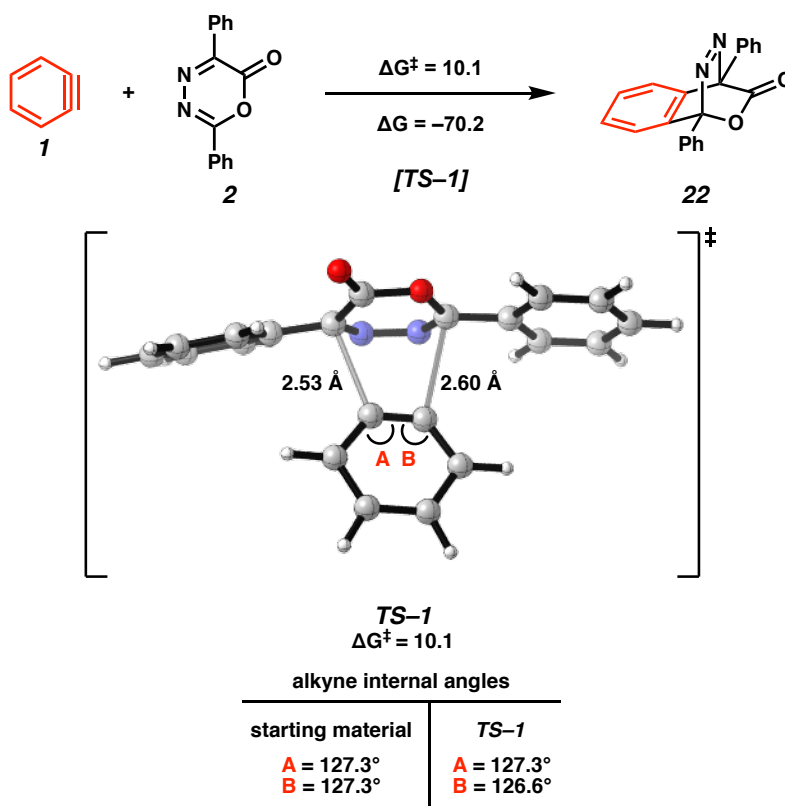

**Figure S4.** Transition states structure for DA1 of benzyne (**1**) and oxadiazinone **2** and alkyne internal angles in the starting material and **TS-1**. Energies were calculated with M06-2X/6-311+G(d,p)/SMD(MeCN) and are provided in kcal mol<sup>-1</sup>. The alkyne internal angles in starting material **1** and **TS-1** differ by a small degree (0°–0.7°), demonstrating that benzyne (**1**) is predistorted for DA1. Predistortion of benzyne (**1**) results in a lower energy barrier for cycloaddition when compared to  $\Delta G^\ddagger$  for DA1 of cyclohexyne (**23**) and oxadiazinone **2** (see Figure S5).

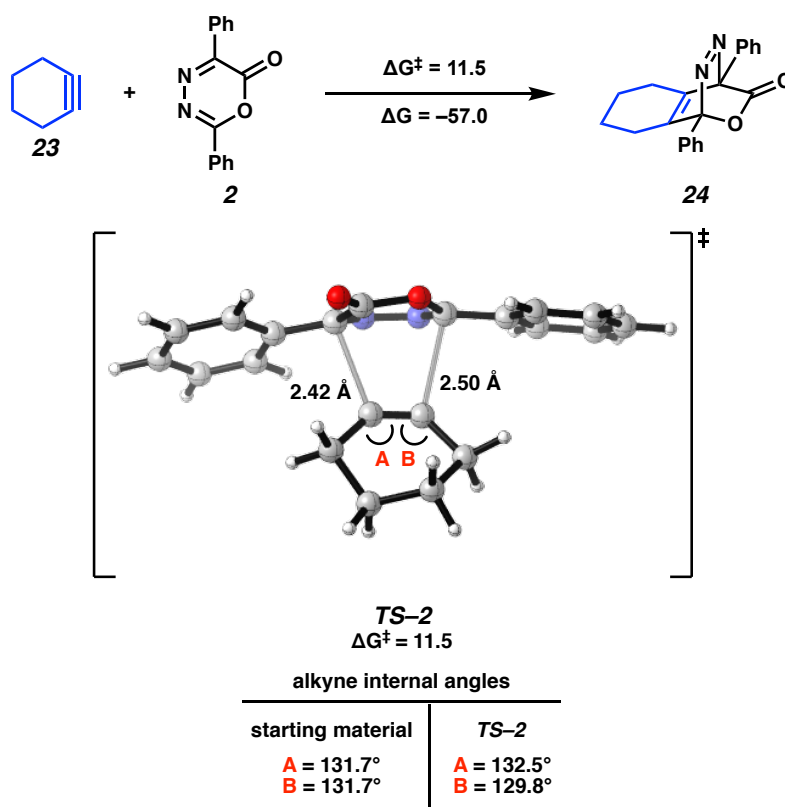

**Figure S5.** Transition state structure for DA1 of cyclohexyne (**23**) and oxadiazinone **2** and alkyne internal angles in the starting material and **TS-1**. Energies were calculated with M06-2X/6-311+G(d,p)/SMD(MeCN) and are provided in kcal mol<sup>-1</sup>. The alkyne internal angles in starting material **23** and **TS-2** differ by 0.8° to 1.9°, demonstrating that cyclohexyne (**23**) is less predistorted than benzyne (**1**) (see Figure S4) for DA1. Less predistortion of cyclohexyne (**23**) results in a higher energy barrier for cycloaddition when compared to  $\Delta G^\ddagger$  for DA1 of benzyne (**1**) and oxadiazinone **2** (see Figure S4). We hypothesize that the more stabilizing  $\Delta E_{\text{int}}^\ddagger$  in **TS-2** than in **TS-1** results from the presence of (1) attractive, non-covalent interactions between the sp<sup>3</sup>-hybridized protons of cyclohexyne (**23**) with aromatic protons on oxadiazinone **2** and (2) a more reactive, higher energy HOMO for the dienophile component in **TS-2**. The computed energy of the HOMO of cyclohexyne (**23**) is -8.1 eV while that of benzyne (**1**) is -8.9 eV.

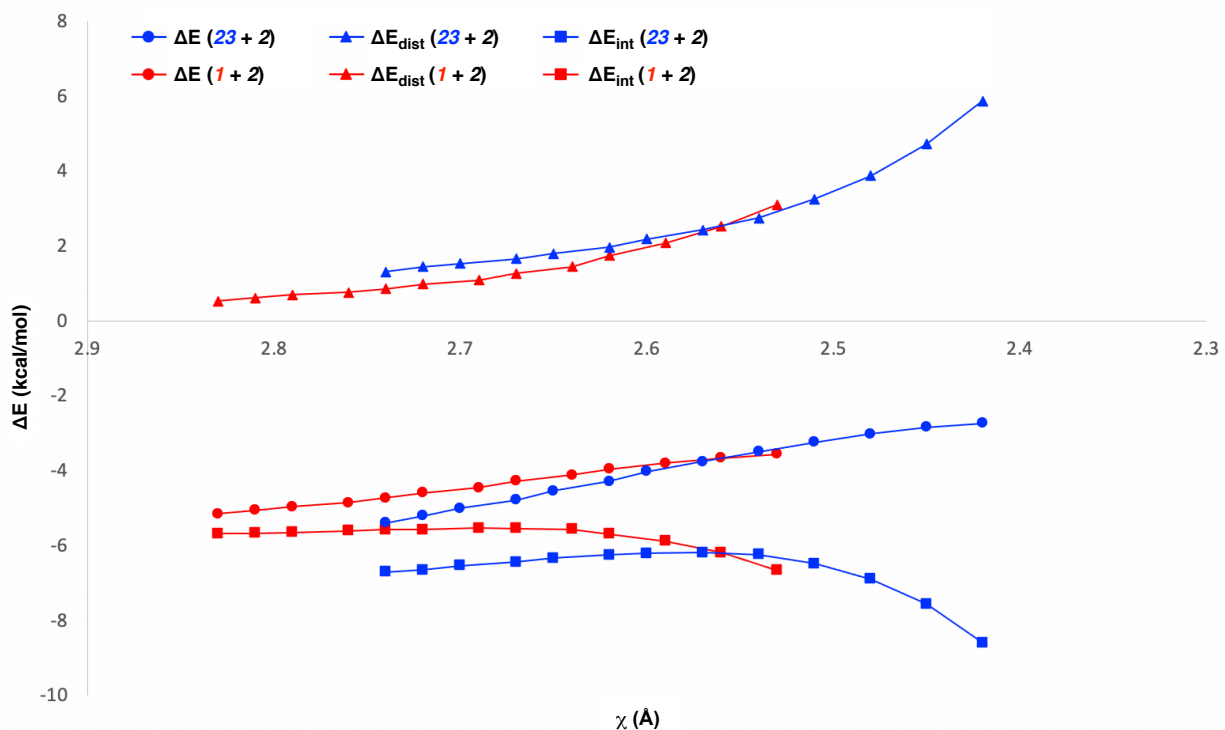

**Figure S6.** D/IAS analysis along the reaction coordinate for DA1 of benzyne (**1**) and cyclohexyne (**23**) with oxadiazinone **2**. The x-axis corresponds to the length of the forming bond  $\alpha$  to the carbonyl of oxadiazinone **2** and represents reaction progression. Energies were calculated with M06-2X/6-311+G(d,p)/SMD(MeCN) and are provided in kcal mol<sup>-1</sup>. These results demonstrate that  $\Delta E_{\text{dist}}$  is lower along the reaction pathway for DA1 of benzyne (**1**) with oxadiazinone **2** and results in a lower  $\Delta E^\ddagger$  for cycloaddition. DA1 of cyclohexyne (**23**) with oxadiazinone **2** involves more stabilizing  $\Delta E_{\text{int}}$  along the reaction coordinate, but this effect does not outcompete  $\Delta E_{\text{dist}}$ , which is unfavorable.

r-DA1

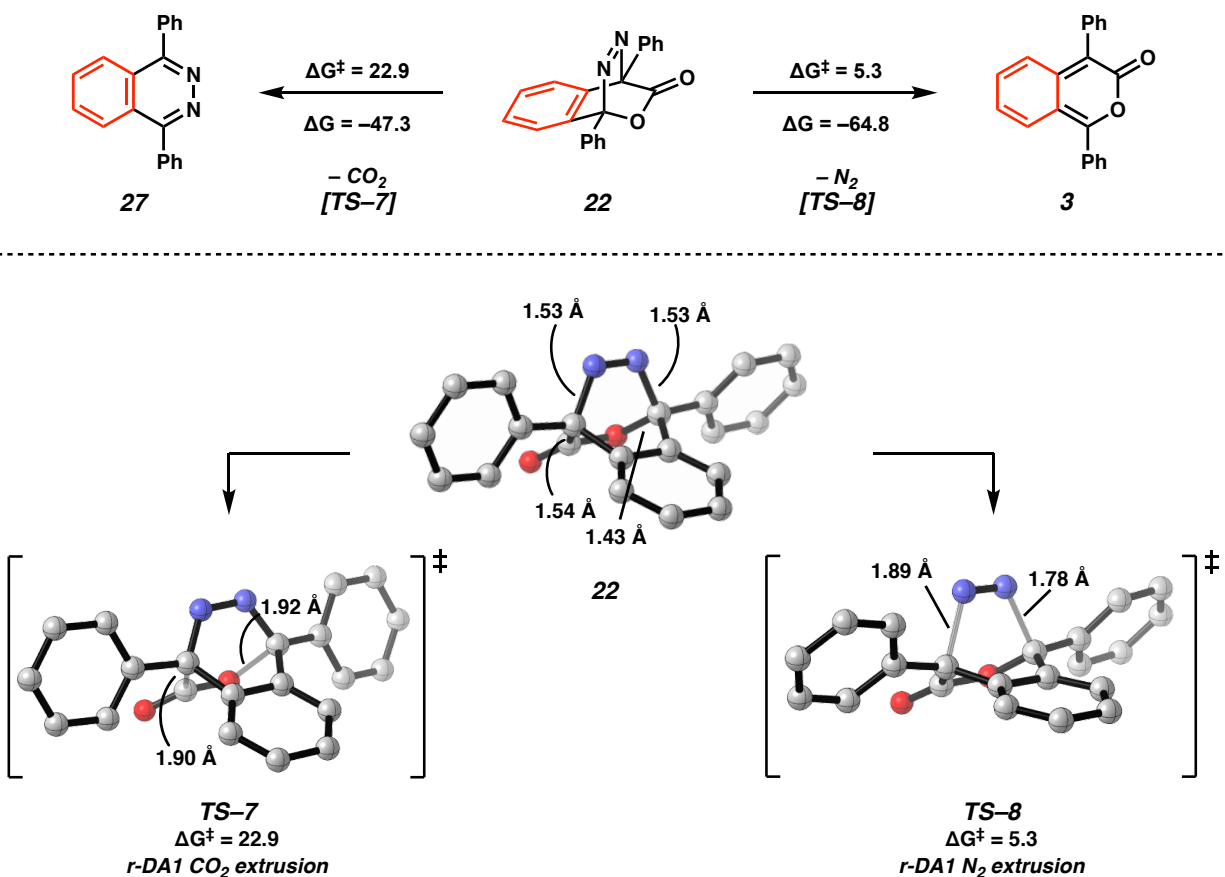

**Figure S7.** Transition state structures for r-DA1 from [2.2.2] bicycle **22**. Protons hidden for clarity. **TS-7** involves  $CO_2$  extrusion and **TS-8** involves  $N_2$  extrusion. Energies were calculated with M06-2X/6-311+G(d,p)/SMD(MeCN) and are provided in kcal mol<sup>-1</sup>. Bond lengths are labelled to show that the change in C–N bond lengths that is required to arrive at **TS-8** for  $N_2$  release is smaller than the change in C–O and C–C bond lengths needed to arrive at **TS-7** for  $CO_2$  extrusion.

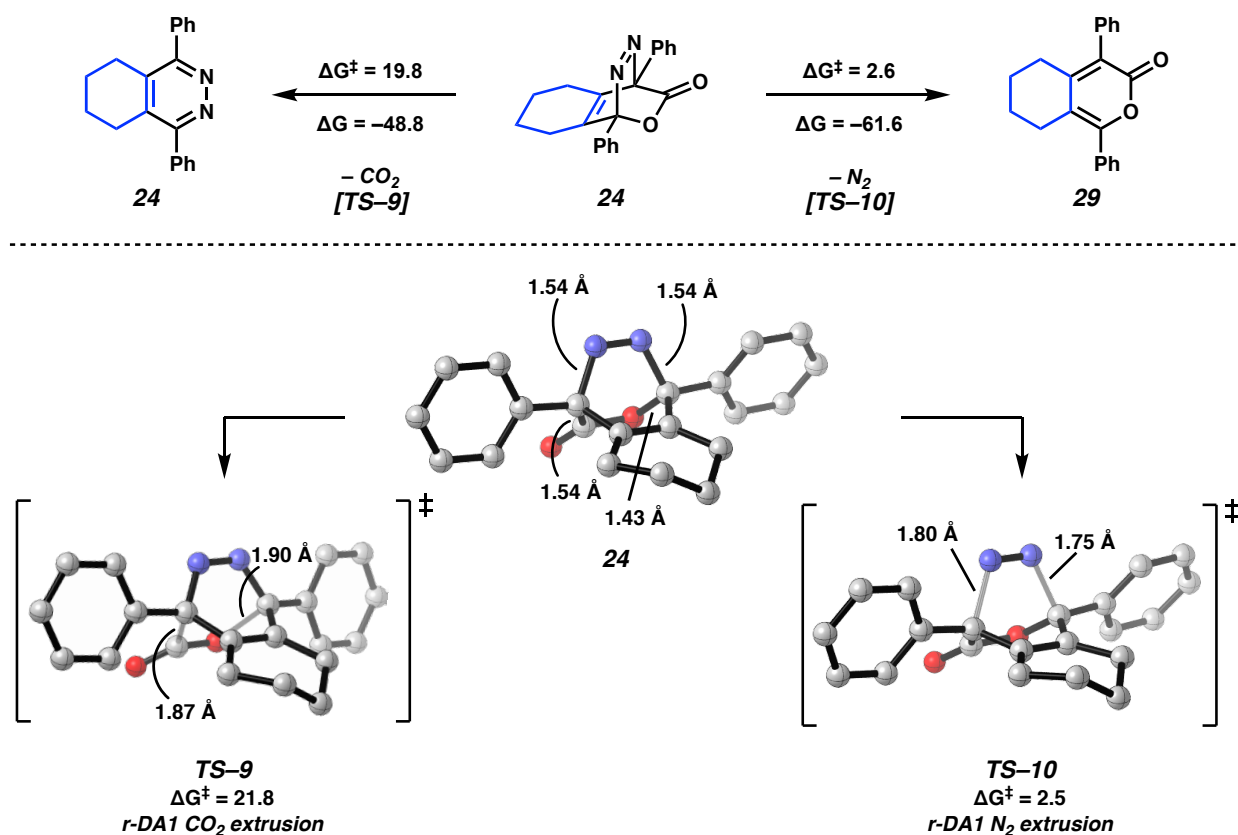

**Figure S8.** Transition state structures for r-DA1 from [2.2.2] bicyclic **24**. **TS-9** involves CO<sub>2</sub> extrusion and **TS-10** involves N<sub>2</sub> extrusion. Protons hidden for clarity. Energies were calculated with M06-2X/6-311+G(d,p)/SMD(MeCN) and are provided in kcal mol<sup>-1</sup>. Bond lengths are labelled to show that the change in C–N bond lengths that is required to arrive at **TS-10** for N<sub>2</sub> release is smaller than the change in C–O and C–C bond lengths needed to arrive at **TS-9** for CO<sub>2</sub> extrusion.

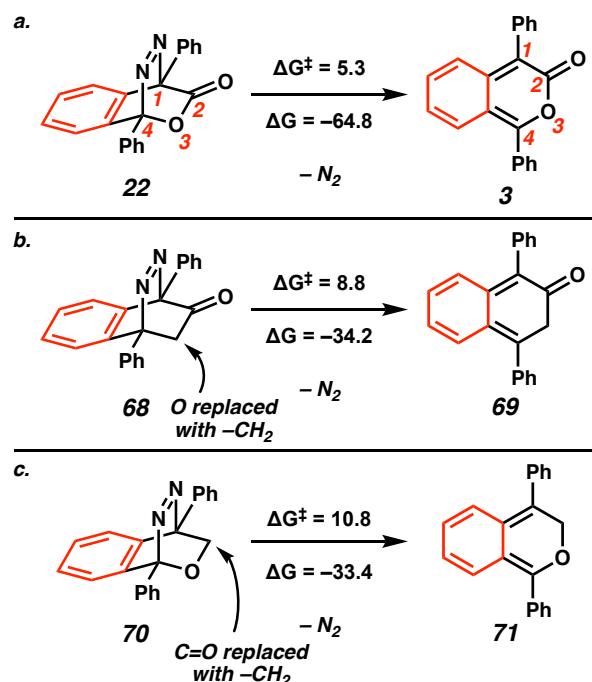

**Figure S9.** Energetics of r-DA1  $N_2$  extrusion from bicycles **22**, **68**, and **70**. Comparison of  $\Delta G^\ddagger$  and  $\Delta G$  for r-DA1 from bicycle **22** versus bicycle **68** demonstrates that replacement of O3 with a  $CH_2$  group increases  $\Delta G^\ddagger$  from  $5.3 \text{ kcal mol}^{-1}$  to  $8.8 \text{ kcal mol}^{-1}$  and decreases exergonicity from  $-64.8 \text{ kcal mol}^{-1}$  to  $-34.2 \text{ kcal mol}^{-1}$ . These results provide support for the presence of a stabilizing hyperconjugative interaction between the lone pair of O3 and the C4–N  $\sigma^*$  orbital in r-DA1 of bicycle **22**, which lowers  $\Delta G^\ddagger$ . An analogous comparison of  $\Delta G^\ddagger$  and  $\Delta G$  for r-DA1 from bicycle **22** versus bicycle **70** suggests that there is additional hyperconjugation between the C2=O  $\pi$  orbital and the adjacent C1–N  $\sigma^*$  orbital in r-DA1 of intermediate **22** that is also stabilizing. Replacing C2=O with a  $CH_2$  group increases  $\Delta G^\ddagger$  from  $5.3 \text{ kcal mol}^{-1}$  to  $10.8 \text{ kcal mol}^{-1}$  and decreases exergonicity from  $-64.8 \text{ kcal mol}^{-1}$  to  $-33.4 \text{ kcal mol}^{-1}$ .



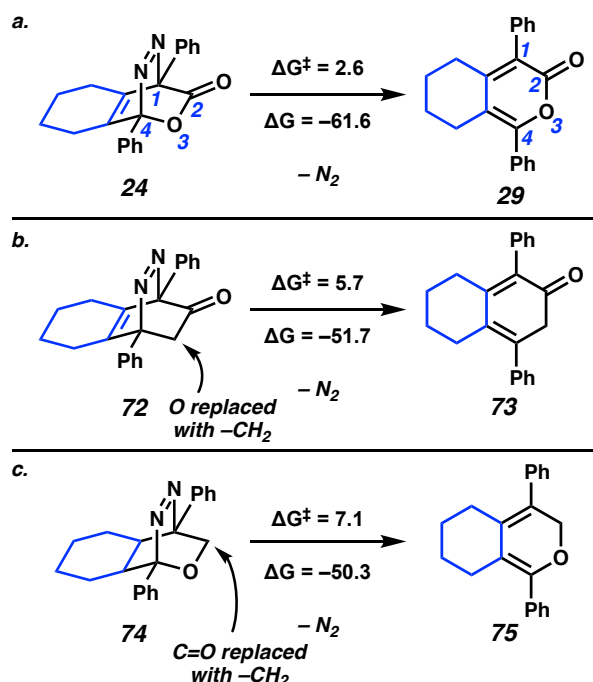

**Figure S10.** Energetics of r-DA1  $N_2$  extrusion from bicycles **24**, **72**, and **74**. Comparison of  $\Delta G^\ddagger$  and  $\Delta G$  for r-DA1 from bicycle **24** versus bicycle **72** demonstrates that replacement of O3 with a  $CH_2$  group increases  $\Delta G^\ddagger$  from 2.6 kcal mol<sup>-1</sup> to 5.7 kcal mol<sup>-1</sup> and decreases exergonicity from -61.6 kcal mol<sup>-1</sup> to -51.7 kcal mol<sup>-1</sup>. These results provide support for the presence of a stabilizing hyperconjugative interaction between the lone pair of O3 and the C4-N  $\sigma^*$  orbital in r-DA1 of bicycle **24**, which lowers  $\Delta G^\ddagger$ . An analogous comparison of  $\Delta G^\ddagger$  and  $\Delta G$  for r-DA1 from bicycle **24** versus bicycle **74** suggests that there is additional hyperconjugation between the C2=O  $\pi$  orbital and the adjacent C1-N  $\sigma^*$  orbital in r-DA1 of intermediate **24** that is also stabilizing. Replacing C2=O with a  $CH_2$  group increases  $\Delta G^\ddagger$  from 2.6 kcal mol<sup>-1</sup> to 7.1 kcal mol<sup>-1</sup> and decreases exergonicity from -61.6 kcal mol<sup>-1</sup> to -50.3 kcal mol<sup>-1</sup>.

## DA2

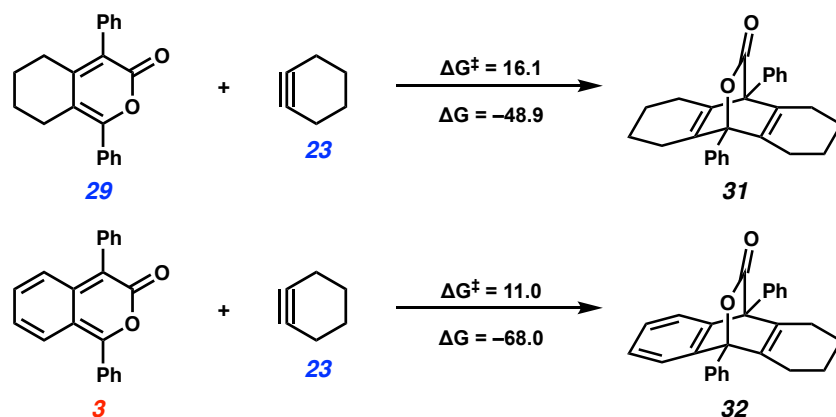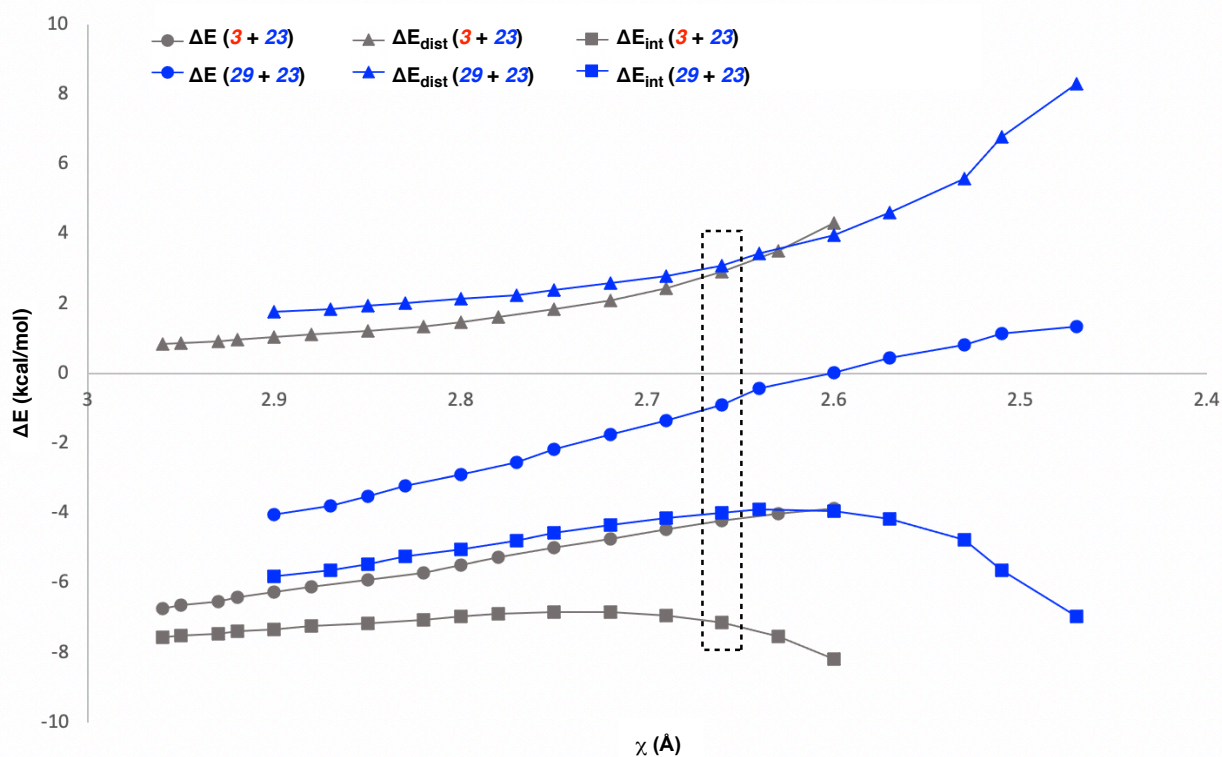

**Figure S11.** D/IAS results for DA2 of alkylpyrone **29** with cyclohexyne (**23**) and benzopyrone **2** with cyclohexyne (**23**) along the reaction coordinate. The x-axis corresponds to the length of the forming bond  $\alpha$  to the carbonyl of the pyrone bridgehead and represents reaction progression. Energies were calculated with M06-2X/6-311+G(d,p)/SMD(MeCN) and are provided in kcal mol<sup>-1</sup>. These results reveal that  $\Delta E_{\text{int}}$  is significantly more stabilizing in DA2 of alkylpyrone **29** with cyclohexyne (**23**) and results in a lower  $\Delta E^\ddagger$  for cycloaddition. The same conclusion cannot be reached if  $\Delta E_{\text{int}}$  is only analyzed at the corresponding DA2 transition states. The points inside the

dashed box are  $\Delta E$ ,  $\Delta E_{\text{int}}$ , and  $\Delta E_{\text{dist}}$  values at analogous geometries for the three reactions. These analogous geometries and energy values are shown in Figure 4e of the manuscript.

#### D. Substituent Effects on DA1 and DA2

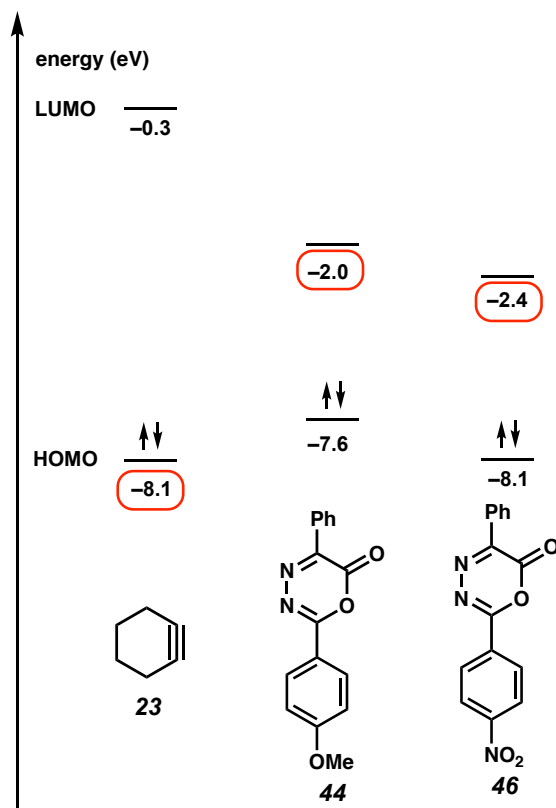

**Figure S12.** MO Energies of cyclohexyne (**23**), methoxy-substituted oxadiazinone **44**, and nitro-substituted oxadiazinone **46**. Energies were calculated with M06-2X/6-311+G(d,p). These results demonstrate that DA1 reaction of cyclohexyne (**23**) with oxadiazinones **44** and **46** are inverse electron-demand DA reactions involving the HOMO of cyclohexyne (**23**) and the LUMO of oxadiazinone **44** or **46**. The LUMO of nitro-substituted oxadiazinone **46** is lower lying than the LUMO of methoxy-substituted oxadiazinone **44**. Therefore, DA1 of cyclohexyne (**23**) and **46** should occur more readily. Experimental results show that DA1 of cyclohexyne (**23**) and **46** is lower yielding than DA1 of **23** and **44** (Figure 7, entries 2 and 4), which is attributed to difficulty with purification of the corresponding pyrone product (i.e., pyrone **58**).

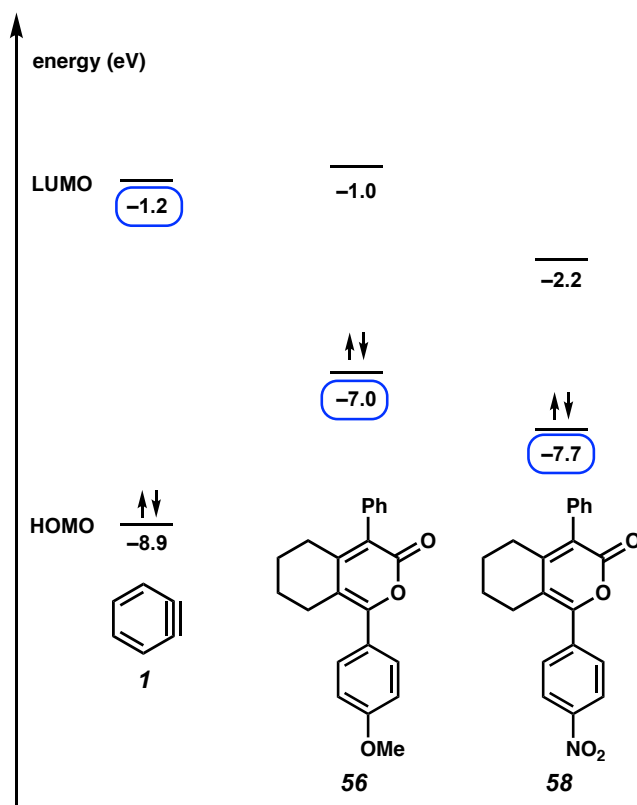

**Figure S13.** MO Energies of benzyne (**1**), methoxy-substituted pyrone **56**, and nitro-substituted pyrone **58**. Energies were calculated with M06-2X/6-311+G(d,p). These results demonstrate that DA2 reaction of benzyne (**1**) with pyrones **56** and **58** are inverse electron-demand DA cycloadditions involving the LUMO of benzyne (**1**) and the HOMO of pyrone **56** or **58**. The HOMO of methoxy-substituted pyrone **56** is higher-lying than the HOMO of pyrone **58**. In experiments, DA2 of benzyne (**1**) and methoxy-containing pyrone **56** is higher-yielding than DA2 of benzyne (**1**) and nitro-containing pyrone **58** (Figure 7, entries 2 and 4). This can be explained by the higher-lying HOMO of pyrone **56**, which is more reactive because of the electron-donating effect of the methoxy substituent.

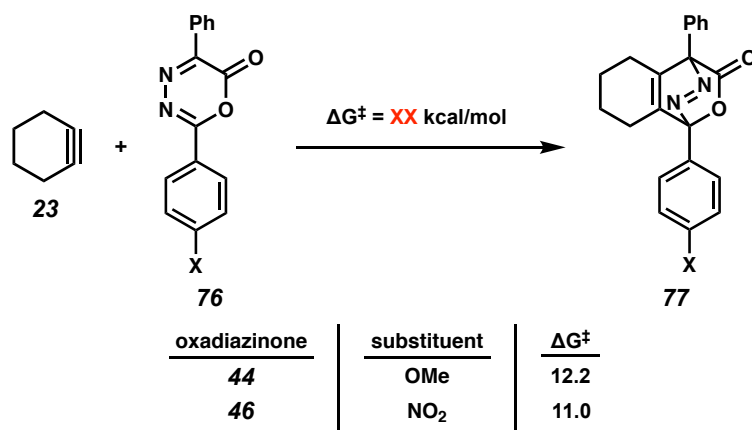

**Figure S14.** Gibbs free energy barrier ( $\Delta G^\ddagger$ ) for DA1 of cyclohexyne (**23**) with *p*-substituted oxadiazinone **76**. Energies were calculated with M06-2X/6-311+G(d,p)/SMD(MeCN). DA1 cycloaddition of cyclohexyne (**23**) and methoxy-containing oxadiazinone **44** has  $\Delta G^\ddagger$  of 12.2 kcal mol<sup>-1</sup> while DA1 reaction of cyclohexyne (**23**) and nitro-substituted oxadiazinone **46** has  $\Delta G^\ddagger$  of 11.0 kcal mol<sup>-1</sup>. These results provide further support for the stabilizing effect of an electron-withdrawing group on the oxadiazinone fragment in the corresponding TS for DA1 of cyclohexyne (**23**) and oxadiazinone **46**. Experimental results show that DA1 of **23** and **46** is lower yielding than DA1 of **23** and **44** (Figure 7, entries 2 and 4), which is attributed to difficulty with the purification of the corresponding pyrone product (i.e., pyrone **58**).

## E. Free Energy Profiles

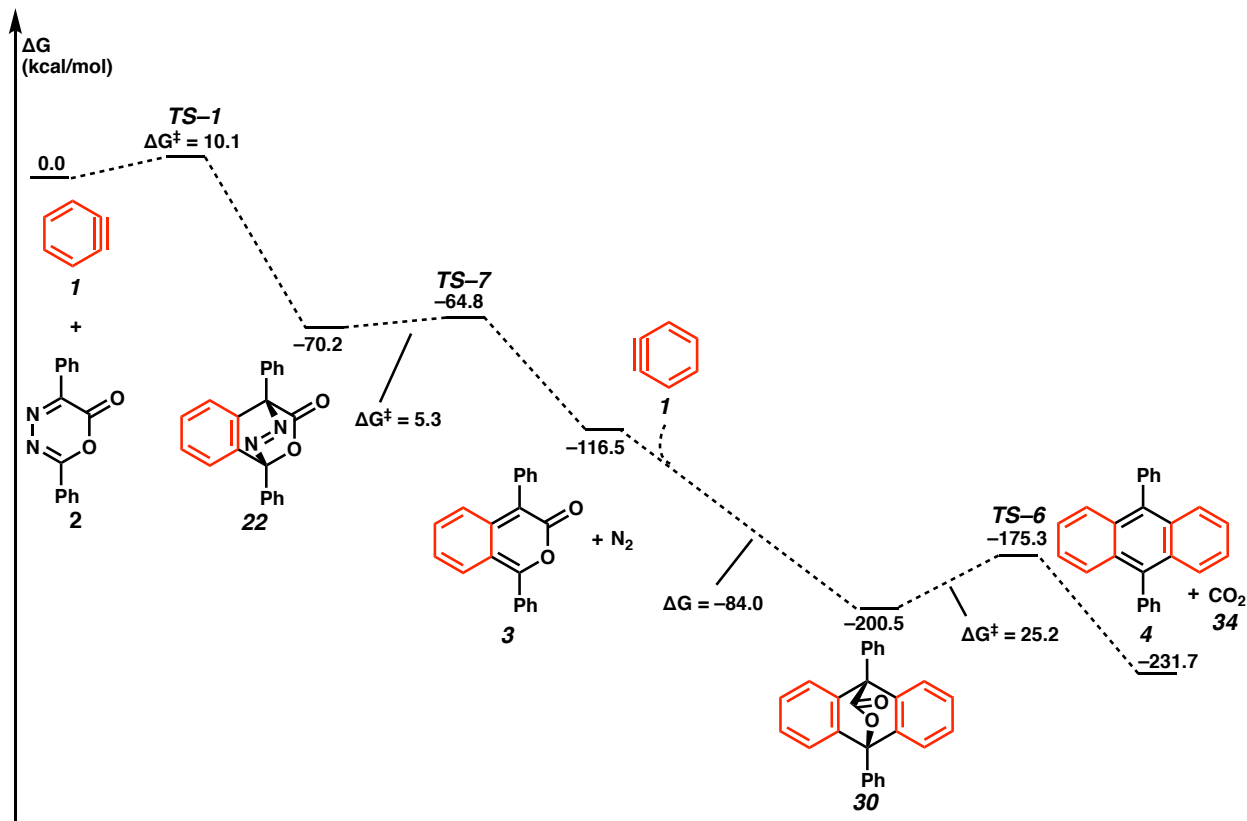

**Figure S12.** Free energy profile for the cycloaddition cascade of benzyne (1) and oxadiazinone 2 resulting in 9,10-diphenylanthracene (4). Energies were calculated with M06-2X/6-311+G(d,p)/SMD(MeCN) and are in units of kcal mol<sup>-1</sup>.

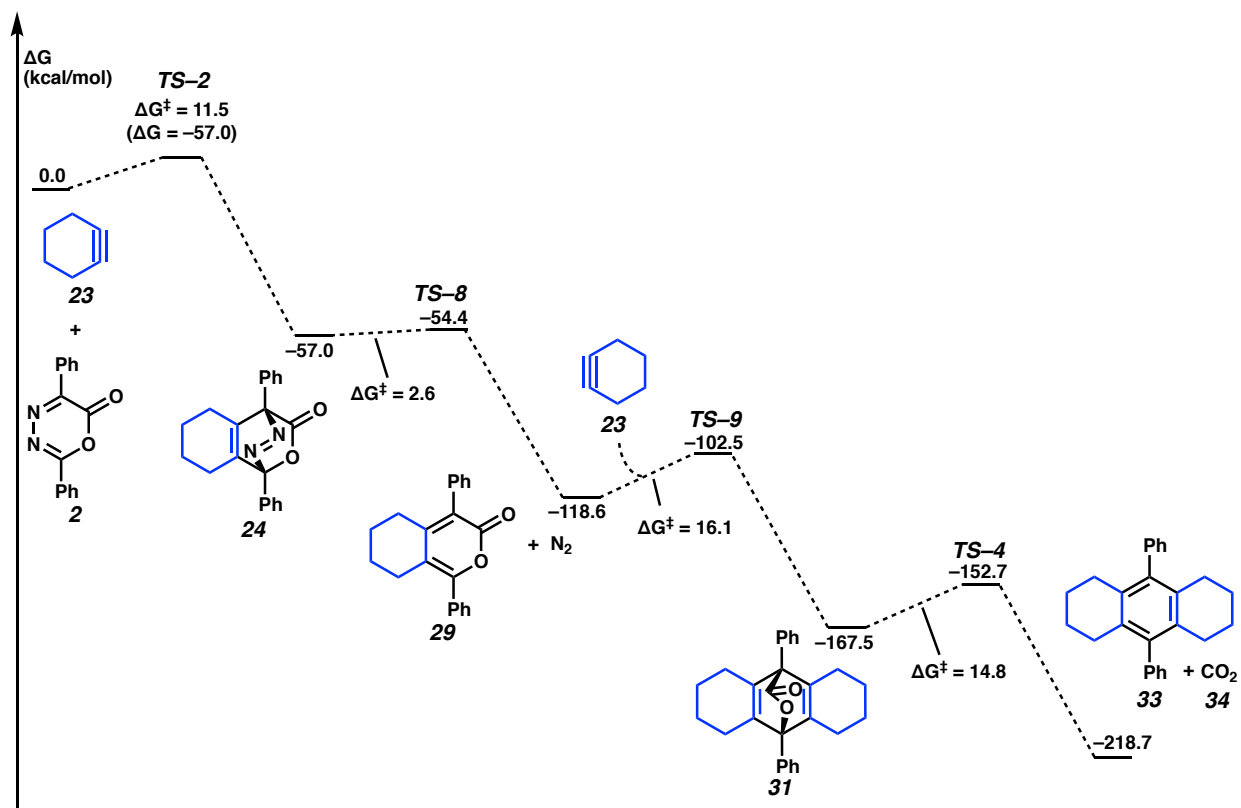

**Figure S13.** Free energy profile for the cycloaddition cascade of cyclohexyne (**23**) and oxadiazinone **2** resulting in tricyclic product **33**. Energies were calculated with M06-2X/6-311+G(d,p)/SMD(MeCN) and are in units of kcal mol<sup>-1</sup>.

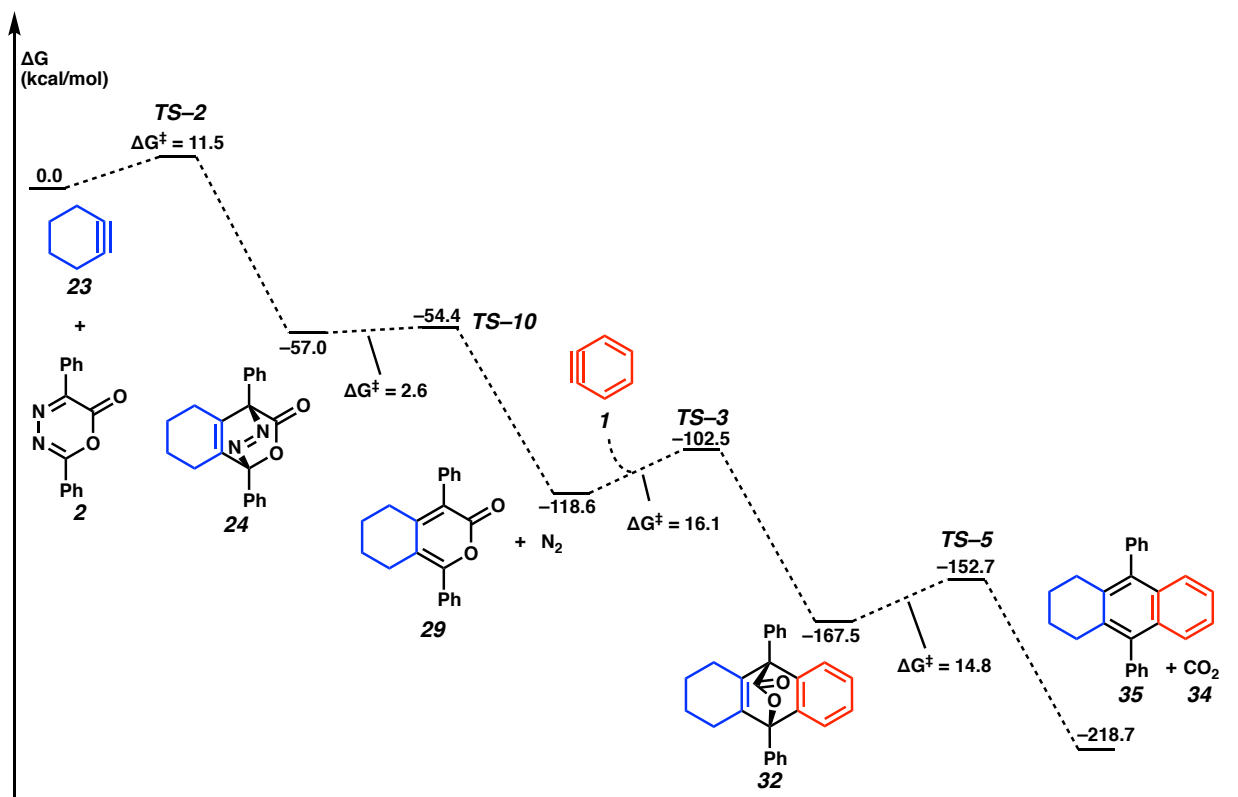

**Figure S14.** Free energy profile for the cycloaddition cascade of cyclohexyne (**23**), oxadiazinone **2**, and benzyne (**1**) resulting in tricyclic product **35**. Energies were calculated with M06-2X/6-311+G(d,p)/SMD(MeCN) and are in units of kcal mol<sup>-1</sup>.



## F. Cartesian Coordinates and Energies of Optimized Structures

### benzyne (1)

|   |             |             |             |
|---|-------------|-------------|-------------|
| C | 0.70253200  | 1.05306600  | 0.00000200  |
| C | 1.46049800  | -0.13262800 | 0.00000000  |
| C | 0.62259500  | -1.23253100 | -0.00000100 |
| C | -0.62259500 | -1.23253100 | -0.00000100 |
| C | -1.46049800 | -0.13262800 | -0.00000200 |
| C | -0.70253200 | 1.05306600  | 0.00000100  |
| H | 1.22589500  | 2.00550700  | 0.00000400  |
| H | 2.54456900  | -0.13295000 | 0.00000100  |
| H | -2.54456900 | -0.13295000 | -0.00000200 |
| H | -1.22589500 | 2.00550700  | 0.00000300  |

Electronic energy (M06-2X/6-311+G(d,p)/SMD(MeCN)) = -230.875821994 Hartrees

Zero-point correction = 0.076226 Hartrees

Thermal correction to enthalpy = 0.081603 Hartrees

Thermal correction to Gibbs free energy = 0.048891 Hartrees

Quasiharmonic free energy correction = 0.048891 Hartrees

### oxadiazinone 2

|   |             |             |             |
|---|-------------|-------------|-------------|
| C | -1.38974300 | -0.15847100 | -0.00010600 |
| C | 1.28291800  | -0.07603600 | -0.00010600 |
| C | 0.54870000  | 1.21593200  | 0.00018200  |
| N | 0.64174600  | -1.20400900 | -0.00036600 |
| N | -0.72309100 | -1.25925300 | -0.00033400 |
| O | 0.98663900  | 2.32987400  | 0.00049200  |
| O | -0.82068800 | 1.06589300  | 0.00010900  |
| C | 2.76587400  | -0.12454500 | -0.00004500 |
| C | 3.38172600  | -1.38690500 | 0.00044900  |
| C | 3.57134100  | 1.02232500  | -0.00049700 |
| C | 4.76317600  | -1.49803300 | 0.00048700  |
| H | 2.75708000  | -2.27232200 | 0.00079000  |
| C | 4.95863500  | 0.90008200  | -0.00045700 |
| H | 3.12188300  | 2.00550500  | -0.00087600 |
| C | 5.55974200  | -0.35283200 | 0.00003400  |
| H | 5.22193500  | -2.48196900 | 0.00089500  |
| H | 5.56945800  | 1.79737300  | -0.00080200 |
| H | 6.64197800  | -0.44049300 | 0.00007500  |
| C | -2.85996800 | -0.13923500 | -0.00005400 |
| C | -3.55686900 | 1.07239900  | 0.00017100  |
| C | -3.55561400 | -1.35359200 | -0.00022000 |
| C | -4.94726000 | 1.06564200  | 0.00022800  |
| H | -3.01054400 | 2.00913700  | 0.00030100  |

|   |             |             |             |
|---|-------------|-------------|-------------|
| C | -4.94335400 | -1.35002500 | -0.00015700 |
| H | -2.99266900 | -2.28045900 | -0.00039200 |
| C | -5.64045000 | -0.14200100 | 0.00006600  |
| H | -5.48972800 | 2.00549300  | 0.00040400  |
| H | -5.48458700 | -2.29063000 | -0.00028200 |
| H | -6.72611900 | -0.14317400 | 0.00011600  |

Electronic energy (M06-2X/6-311+G(d,p)/SMD(MeCN)) = -837.439699212 Hartrees

Zero-point correction = 0.221302 Hartrees

Thermal correction to enthalpy = 0.235590 Hartrees

Thermal correction to Gibbs free energy = 0.179907 Hartrees

Quasiharmonic free energy correction = 0.048891 Hartrees

### benzopyrone 3

|   |             |             |             |
|---|-------------|-------------|-------------|
| C | -0.74591900 | 3.38061100  | -0.58879500 |
| C | -1.45030300 | 2.23157300  | -0.45389900 |
| C | -0.77570300 | 0.97677000  | -0.23239000 |
| C | 0.67709900  | 0.93219200  | -0.20722500 |
| C | 1.37004100  | 2.19134900  | -0.36194800 |
| C | 0.68906500  | 3.35183600  | -0.53420400 |
| H | -1.25565700 | 4.31990800  | -0.77422600 |
| H | -2.52968400 | 2.23254500  | -0.55418500 |
| C | -1.45456800 | -0.21114600 | -0.06978900 |
| C | 1.34465000  | -0.27611300 | -0.07775500 |
| H | 2.45333500  | 2.18495100  | -0.38014500 |
| H | 1.23829900  | 4.27860200  | -0.67157000 |
| C | 0.59649600  | -1.51443600 | -0.11107600 |
| O | 1.00830400  | -2.64442000 | -0.17385200 |
| O | -0.79784000 | -1.36980700 | -0.03501900 |
| C | 2.81350000  | -0.39377400 | 0.07812000  |
| C | 3.48724500  | 0.36110700  | 1.04679800  |
| C | 3.55188500  | -1.28124100 | -0.71452400 |
| C | 4.86509700  | 0.25347300  | 1.20290100  |
| H | 2.91665400  | 1.02433400  | 1.69199000  |
| C | 4.92922300  | -1.38668600 | -0.55839800 |
| H | 3.03652400  | -1.89223600 | -1.44681900 |
| C | 5.59120400  | -0.61917500 | 0.39679400  |
| H | 5.36904900  | 0.84231000  | 1.96336300  |
| H | 5.48862200  | -2.07535300 | -1.18426000 |
| H | 6.66644100  | -0.70784500 | 0.51912000  |
| C | -2.90999200 | -0.39915500 | 0.07467800  |
| C | -3.51571800 | -1.50511500 | -0.53507600 |
| C | -3.68555700 | 0.46572500  | 0.85627300  |
| C | -4.88131000 | -1.71698400 | -0.39721000 |
| H | -2.90548400 | -2.18951500 | -1.11524100 |

|   |             |             |             |
|---|-------------|-------------|-------------|
| C | -5.05129700 | 0.24522000  | 0.99591700  |
| H | -3.20968200 | 1.28878000  | 1.38024800  |
| C | -5.65243500 | -0.84035000 | 0.36381300  |
| H | -5.34529500 | -2.57028500 | -0.88138800 |
| H | -5.64415900 | 0.91405600  | 1.61164600  |
| H | -6.71889400 | -1.01051300 | 0.47442000  |

Electronic energy (M06-2X/6-311+G(d,p)/SMD(MeCN)) = -958.99066 Hartrees

Zero-point correction = 0.292770 Hartrees

Thermal correction to enthalpy = 0.310714 Hartrees

Thermal correction to Gibbs free energy = 0.247176 Hartrees

Quasiharmonic free energy correction = 0.24953984 Hartrees

#### 9,10-diphenylanthracene (4)

|   |             |             |             |
|---|-------------|-------------|-------------|
| C | -0.71207100 | 3.65431600  | -0.00024100 |
| C | -1.40179400 | 2.47835300  | -0.00017100 |
| C | -0.71883700 | 1.21882100  | -0.00005500 |
| C | 0.71883500  | 1.21882300  | -0.00005200 |
| C | 1.40179100  | 2.47835500  | -0.00011800 |
| C | 0.71206600  | 3.65431800  | -0.00020500 |
| C | -1.41858600 | 0.00000000  | 0.00000000  |
| C | 1.41858500  | 0.00000200  | -0.00000100 |
| C | 0.71883700  | -1.21882100 | 0.00005100  |
| C | -0.71883500 | -1.21882200 | 0.00005300  |
| C | -1.40179100 | -2.47835300 | 0.00016900  |
| H | -2.48696800 | -2.47997700 | 0.00021400  |
| C | -0.71206600 | -3.65431600 | 0.00023900  |
| C | 0.71207100  | -3.65431500 | 0.00020300  |
| C | 1.40179400  | -2.47835100 | 0.00011700  |
| H | -1.24902000 | 4.59792300  | -0.00033900 |
| H | -2.48697200 | 2.47997500  | -0.00021600 |
| H | 2.48696800  | 2.47997900  | -0.00010400 |
| H | 1.24901300  | 4.59792600  | -0.00025900 |
| H | -1.24901300 | -4.59792400 | 0.00033700  |
| H | 1.24902000  | -4.59792200 | 0.00025700  |
| H | 2.48697200  | -2.47997400 | 0.00010400  |
| C | 2.91180100  | 0.00000100  | 0.00000000  |
| C | 3.62091500  | 0.00006000  | 1.20416700  |
| C | 3.62091600  | -0.00005800 | -1.20416600 |
| C | 5.01327500  | 0.00006000  | 1.20454800  |
| H | 3.07122100  | 0.00010800  | 2.14152300  |
| C | 5.01327600  | -0.00006000 | -1.20454600 |
| H | 3.07122300  | -0.00010500 | -2.14152300 |
| C | 5.71205300  | -0.00000100 | 0.00000100  |
| H | 5.55249300  | 0.00010900  | 2.14706300  |

|   |             |             |             |
|---|-------------|-------------|-------------|
| H | 5.55249500  | -0.00010900 | -2.14706100 |
| H | 6.79771000  | -0.00000100 | 0.00000200  |
| C | -2.91180100 | -0.00000100 | 0.00000000  |
| C | -3.62091500 | 0.00074100  | 1.20416700  |
| C | -3.62091600 | -0.00074400 | -1.20416600 |
| C | -5.01327500 | 0.00073300  | 1.20454800  |
| H | -3.07122100 | 0.00132500  | 2.14152200  |
| C | -5.01327600 | -0.00073700 | -1.20454500 |
| H | -3.07122200 | -0.00132900 | -2.14152100 |
| C | -5.71205300 | -0.00000200 | 0.00000200  |
| H | -5.55249300 | 0.00131000  | 2.14706300  |
| H | -5.55249500 | -0.00131400 | -2.14705900 |
| H | -6.79771000 | -0.00000200 | 0.00000200  |

Electronic energy (M06-2X/6-311+G(d,p)/SMD(MeCN)) = -1001.4824 Hartrees

Zero-point correction = 0.358831 Hartrees

Thermal correction to enthalpy = 0.378196 Hartrees

Thermal correction to Gibbs free energy = 0.310140 Hartrees

Quasiharmonic free energy correction = 0.31483747 Hartrees

#### bicycle 22

|   |             |             |             |
|---|-------------|-------------|-------------|
| C | -0.74764600 | 3.39363600  | -0.30399000 |
| C | -1.46210900 | 2.20368700  | -0.16939000 |
| C | -0.74965600 | 1.01727100  | -0.07870000 |
| C | 0.64336500  | 1.00553100  | -0.09989800 |
| C | 1.35824200  | 2.18911600  | -0.22481800 |
| C | 0.64654800  | 3.38416800  | -0.33150700 |
| H | -1.28154300 | 4.33473600  | -0.38843800 |
| H | -2.54763100 | 2.19620900  | -0.14358900 |
| C | -1.29843400 | -0.37748300 | 0.07666800  |
| C | 1.21020500  | -0.39084600 | 0.08511700  |
| H | 2.44353000  | 2.17871500  | -0.23289000 |
| H | 1.18747100  | 4.32004700  | -0.43051900 |
| C | 0.58181000  | -1.23174700 | -1.03590100 |
| N | 0.54727400  | -0.94821900 | 1.34723000  |
| N | -0.67613400 | -0.91656100 | 1.36355500  |
| O | 1.15483900  | -1.87083400 | -1.86773800 |
| O | -0.77099300 | -1.19234900 | -0.97353000 |
| C | 2.70984000  | -0.47539700 | 0.17832000  |
| C | 3.33850900  | -0.65158300 | 1.41111800  |
| C | 3.48542000  | -0.29549000 | -0.97072300 |
| C | 4.72884900  | -0.65835700 | 1.49122000  |
| H | 2.73876400  | -0.79227800 | 2.30300700  |
| C | 4.87341700  | -0.30031700 | -0.88491300 |
| H | 3.00111400  | -0.16338500 | -1.93279500 |

|   |             |             |             |
|---|-------------|-------------|-------------|
| C | 5.49899000  | -0.48336400 | 0.34626800  |
| H | 5.20842300  | -0.80105200 | 2.45465400  |
| H | 5.46637100  | -0.16570500 | -1.78429500 |
| H | 6.58272800  | -0.49000200 | 0.41110000  |
| C | -2.79153400 | -0.50751100 | 0.11380800  |
| C | -3.50959900 | -0.84641500 | -1.03180800 |
| C | -3.46199800 | -0.21618200 | 1.30206600  |
| C | -4.89980700 | -0.90137200 | -0.98244600 |
| H | -2.97864700 | -1.07562700 | -1.94951300 |
| C | -4.85145300 | -0.26852600 | 1.34410700  |
| H | -2.89155700 | 0.03612700  | 2.19100700  |
| C | -5.57169400 | -0.61230800 | 0.20228700  |
| H | -5.45840800 | -1.17253000 | -1.87272100 |
| H | -5.37114000 | -0.04770600 | 2.27109300  |
| H | -6.65582500 | -0.65769600 | 0.23722600  |

Electronic energy (M06-2X/6-311+G(d,p)/SMD(MeCN)) = -1068.45679806 Hartrees

Zero-point correction = 0.303704 Hartrees

Thermal correction to enthalpy = 0.322551 Hartrees

Thermal correction to Gibbs free energy = 0.257021 Hartrees

Quasiharmonic free energy correction = 0.26011665 Hartrees

#### cyclohexyne (**23**)

|   |             |             |             |
|---|-------------|-------------|-------------|
| C | -0.71395600 | 1.04349400  | -0.29188600 |
| C | -1.58881400 | -0.19118700 | 0.11820200  |
| C | -0.60708600 | -1.29405400 | 0.02726700  |
| C | 0.60707900  | -1.29405000 | -0.02726700 |
| C | 1.58881500  | -0.19119400 | -0.11820200 |
| C | 0.71396000  | 1.04349200  | 0.29188600  |
| H | -1.96758800 | -0.08926900 | 1.14100700  |
| H | -2.45307500 | -0.28283900 | -0.54602100 |
| H | -0.64968800 | 1.06008000  | -1.38650500 |
| H | -1.22643400 | 1.96254000  | 0.01584900  |
| H | 2.45307300  | -0.28285000 | 0.54602400  |
| H | 1.96759200  | -0.08927600 | -1.14100600 |
| H | 0.64969200  | 1.06007800  | 1.38650500  |
| H | 1.22644200  | 1.96253500  | -0.01585000 |

Electronic energy (M06-2X/6-311+G(d,p)/SMD(MeCN)) = -233.2943 Hartrees

Zero-point correction = 0.123404 Hartrees

Thermal correction to enthalpy = 0.129874 Hartrees

Thermal correction to Gibbs free energy = 0.094946 Hartrees

Quasiharmonic free energy correction = 0.094946 Hartrees

#### bicycle **24**

|   |             |             |             |
|---|-------------|-------------|-------------|
| C | -0.72109500 | 3.34018300  | -0.65747600 |
| C | -1.56993200 | 2.16436100  | -0.16542600 |
| C | -0.72311600 | 0.92715000  | -0.07381000 |
| C | 0.61404200  | 0.91777100  | -0.09274300 |
| C | 1.46387900  | 2.15456800  | -0.18704400 |
| C | 0.61532400  | 3.40196800  | 0.08606900  |
| H | -1.27372500 | 4.27629600  | -0.53224200 |
| H | -2.41827500 | 1.98606900  | -0.83644500 |
| C | -1.28528700 | -0.46331800 | 0.07980000  |
| C | 1.20063200  | -0.47421800 | 0.08287900  |
| H | 2.29561500  | 2.08343400  | 0.52279900  |
| H | 0.42196900  | 3.47381200  | 1.16409700  |
| C | 0.57804300  | -1.31725700 | -1.03884900 |
| N | 0.55166500  | -1.07386700 | 1.34215000  |
| N | -0.66751700 | -1.03767400 | 1.36678000  |
| O | 1.15665300  | -1.94129900 | -1.87998000 |
| O | -0.77149200 | -1.29741500 | -0.96406700 |
| C | 2.70170900  | -0.54623100 | 0.16903200  |
| C | 3.33681400  | -0.70986900 | 1.40077300  |
| C | 3.47326300  | -0.36400400 | -0.98198600 |
| C | 4.72736300  | -0.69849700 | 1.47804500  |
| H | 2.74156200  | -0.85649400 | 2.29500200  |
| C | 4.86133700  | -0.35279200 | -0.89999000 |
| H | 2.98582100  | -0.24844700 | -1.94463100 |
| C | 5.49264500  | -0.52034100 | 0.33026400  |
| H | 5.21080500  | -0.83117700 | 2.44104800  |
| H | 5.45032900  | -0.21759200 | -1.80192600 |
| H | 6.57654900  | -0.51357200 | 0.39228700  |
| C | -2.77932000 | -0.58031500 | 0.12254500  |
| C | -3.50757100 | -0.91109600 | -1.01917900 |
| C | -3.44160100 | -0.28381000 | 1.31381700  |
| C | -4.89828100 | -0.94787600 | -0.96386800 |
| H | -2.98328500 | -1.14850100 | -1.93884300 |
| C | -4.83127100 | -0.31875200 | 1.36282100  |
| H | -2.86440000 | -0.04501600 | 2.20254900  |
| C | -5.56131800 | -0.65081400 | 0.22388300  |
| H | -5.46423400 | -1.21225100 | -1.85160600 |
| H | -5.34388500 | -0.09439100 | 2.29294800  |
| H | -6.64576000 | -0.68230300 | 0.26366200  |
| H | 1.92369400  | 2.21265500  | -1.18326500 |
| H | 1.17454100  | 4.29799700  | -0.19988900 |
| H | -0.52989200 | 3.21929300  | -1.73138100 |
| H | -2.00528500 | 2.38981700  | 0.81835900  |

Electronic energy (M06-2X/6-311+G(d,p)/SMD(MeCN)) = -1070.8538 Hartrees

Zero-point correction = 0.350358 Hartrees

Thermal correction to enthalpy = 0.370318 Hartrees

Thermal correction to Gibbs free energy = 0.302783 Hartrees

Quasiharmonic free energy correction = 0.30567612 Hartrees

alkylpyrone **29**

|   |             |             |             |
|---|-------------|-------------|-------------|
| C | -0.65035300 | 3.27617200  | -0.90996500 |
| C | -1.50658400 | 2.23854600  | -0.18886300 |
| C | -0.77958100 | 0.91839200  | -0.02023800 |
| C | 0.67207000  | 0.86983100  | -0.01516400 |
| C | 1.47556700  | 2.14239500  | -0.22838700 |
| C | 0.66661100  | 3.43600600  | -0.16125800 |
| H | -1.19225500 | 4.22573700  | -0.96157700 |
| H | -2.44911600 | 2.07347600  | -0.71952500 |
| C | -1.44998400 | -0.26144400 | 0.08122400  |
| C | 1.32409100  | -0.32770600 | 0.08206300  |
| H | 2.31074100  | 2.17748300  | 0.47403900  |
| H | 0.45215100  | 3.69224200  | 0.88459200  |
| C | 0.57354400  | -1.57893500 | 0.09627700  |
| O | 1.02448600  | -2.69512400 | 0.07129000  |
| O | -0.80036700 | -1.44722700 | 0.13335200  |
| C | 2.80501200  | -0.46826100 | 0.09763100  |
| C | 3.56523200  | 0.04492000  | 1.15220800  |
| C | 3.45659100  | -1.14358200 | -0.93857200 |
| C | 4.95020700  | -0.08931600 | 1.15959900  |
| H | 3.06086200  | 0.53874600  | 1.97910900  |
| C | 4.84114900  | -1.27543900 | -0.93401500 |
| H | 2.86847800  | -1.57637500 | -1.74217900 |
| C | 5.59180000  | -0.74535800 | 0.11231900  |
| H | 5.52677900  | 0.31116400  | 1.98800900  |
| H | 5.33478100  | -1.79975200 | -1.74649600 |
| H | 6.67220700  | -0.85253700 | 0.11709200  |
| C | -2.91415400 | -0.47226700 | 0.09962800  |
| C | -3.44646300 | -1.58592700 | -0.56297100 |
| C | -3.77740200 | 0.38313500  | 0.79171400  |
| C | -4.81646000 | -1.81487100 | -0.56185700 |
| H | -2.77515300 | -2.26837200 | -1.07364100 |
| C | -5.14830900 | 0.14663000  | 0.79687300  |
| H | -3.37419500 | 1.21775000  | 1.35493600  |
| C | -5.67197800 | -0.94716100 | 0.11406200  |
| H | -5.21782400 | -2.67670700 | -1.08583900 |
| H | -5.80580500 | 0.81300400  | 1.34646000  |
| H | -6.74207700 | -1.12990200 | 0.11737600  |
| H | 1.93597200  | 2.05544400  | -1.22279800 |
| H | 1.26454000  | 4.25487500  | -0.57327500 |

|   |             |            |             |
|---|-------------|------------|-------------|
| H | -0.45633100 | 2.95431600 | -1.94163300 |
| H | -1.77033600 | 2.65365300 | 0.79437700  |

Electronic energy (M06-2X/6-311+G(d,p)/SMD(MeCN)) = -961.41256 Hartrees

Zero-point correction = 0.339887 Hartrees

Thermal correction to enthalpy = 0.358971 Hartrees

Thermal correction to Gibbs free energy = 0.292458 Hartrees

Quasiharmonic free energy correction = 0.29575728 Hartrees

bicyclic lactone **30**

|   |             |             |             |
|---|-------------|-------------|-------------|
| C | -0.70080200 | 3.40096700  | -1.45113300 |
| C | -1.42176500 | 2.30895600  | -0.96632700 |
| C | -0.73643400 | 1.23379000  | -0.41923900 |
| C | 0.66006900  | 1.24326000  | -0.33895800 |
| C | 1.37298000  | 2.34677500  | -0.78970300 |
| C | 0.68553800  | 3.42022800  | -1.35854300 |
| C | -1.34261700 | 0.00000000  | 0.24321200  |
| C | 1.25740000  | -0.00002600 | 0.34931500  |
| C | 0.66005200  | -1.24330200 | -0.33895900 |
| C | -0.73645300 | -1.23381200 | -0.41922100 |
| C | -1.42180500 | -2.30897100 | -0.96629600 |
| H | -2.50615000 | -2.31079900 | -0.99987700 |
| C | -0.70086400 | -3.40099700 | -1.45110000 |
| C | 0.68547600  | -3.42028200 | -1.35851900 |
| C | 1.37294100  | -2.34683600 | -0.78969400 |
| H | -1.22909600 | 4.24461900  | -1.88411500 |
| H | -2.50610900 | 2.31080300  | -0.99991300 |
| H | 2.45331000  | 2.37788500  | -0.69903900 |
| H | 1.24229500  | 4.27970900  | -1.71900100 |
| H | -1.22917600 | -4.24464400 | -1.88407100 |
| H | 1.24221500  | -4.27977700 | -1.71897100 |
| H | 2.45327000  | -2.37796900 | -0.69903100 |
| C | 2.77669600  | -0.00002400 | 0.35476700  |
| C | 3.57969700  | -0.00006600 | 1.49610900  |
| C | 3.40317400  | 0.00004600  | -0.90163800 |
| C | 4.97066100  | -0.00004800 | 1.37631800  |
| H | 3.12493600  | -0.00011400 | 2.47649700  |
| C | 4.78647300  | 0.00006400  | -1.01802800 |
| H | 2.78869300  | 0.00008700  | -1.79941800 |
| C | 5.57982100  | 0.00001500  | 0.12860300  |
| H | 5.57738800  | -0.00008500 | 2.27677100  |
| H | 5.24425900  | 0.00011700  | -2.00266000 |
| H | 6.66234600  | 0.00002800  | 0.04510300  |
| C | -2.84866900 | 0.00001400  | 0.33383500  |
| C | -3.50656200 | 0.00003700  | 1.56188300  |



|   |             |             |             |
|---|-------------|-------------|-------------|
| C | -3.59975500 | 0.00000100  | -0.84694200 |
| C | -4.89952900 | 0.00004700  | 1.60681500  |
| H | -2.92686200 | 0.00004500  | 2.47699400  |
| C | -4.98938800 | 0.00001200  | -0.79858800 |
| H | -3.08867000 | -0.00001800 | -1.80741800 |
| C | -5.64356800 | 0.00003500  | 0.43183300  |
| H | -5.40270600 | 0.00006500  | 2.56887800  |
| H | -5.56079200 | 0.00000200  | -1.72164700 |
| H | -6.72841900 | 0.00004400  | 0.47185600  |
| C | 0.53452200  | -0.00004800 | 1.71938500  |
| O | -0.81324800 | 0.00001600  | 1.59841400  |
| O | 1.02893800  | 0.00011100  | 2.81207900  |

Electronic energy (M06-2X/6-311+G(d,p)/SMD(MeCN)) = -1190.0319 Hartrees

Zero-point correction = 0.376354 Hartrees

Thermal correction to enthalpy = 0.397868 Hartrees

Thermal correction to Gibbs free energy = 0.327406 Hartrees

Quasiharmonic free energy correction = 0.33002912 Hartrees

### bicyclic lactone **31**

|   |             |             |             |
|---|-------------|-------------|-------------|
| C | 0.63728200  | 3.74873500  | -0.74788700 |
| C | 1.49045500  | 2.48047600  | -0.81247500 |
| C | 0.68488100  | 1.27863600  | -0.38866100 |
| C | -0.64913000 | 1.26105300  | -0.32075300 |
| C | -1.51564500 | 2.43904700  | -0.68199000 |
| C | -0.71544200 | 3.51737900  | -1.41674300 |
| H | 1.16835600  | 4.58045300  | -1.22176800 |
| H | 2.36954900  | 2.57704500  | -0.16620500 |
| C | 1.30810900  | 0.02500800  | 0.23260500  |
| C | -1.23722500 | -0.01344400 | 0.32799800  |
| H | -2.36583400 | 2.12298100  | -1.29371500 |
| H | -0.55065000 | 3.19973400  | -2.45490000 |
| C | -0.53698400 | -0.03798900 | 1.71108500  |
| O | -1.05470500 | -0.09736200 | 2.79474600  |
| O | 0.80656600  | -0.00266400 | 1.60584000  |
| C | -2.75621800 | -0.02664100 | 0.31281100  |
| C | -3.36711400 | -0.15232200 | -0.94408700 |
| C | -3.57551000 | 0.11528600  | 1.43391100  |
| C | -4.74828700 | -0.15209700 | -1.08199700 |
| H | -2.73898300 | -0.23870300 | -1.82918000 |
| C | -4.96464800 | 0.11483200  | 1.29458100  |
| H | -3.13283000 | 0.21670100  | 2.41495300  |
| C | -5.55705900 | -0.02071400 | 0.04569900  |
| H | -5.19289400 | -0.25245200 | -2.06755900 |
| H | -5.58394400 | 0.22135800  | 2.18036300  |

|   |             |             |             |
|---|-------------|-------------|-------------|
| H | -6.63829300 | -0.02136100 | -0.05307300 |
| C | 2.81717400  | 0.02453100  | 0.30725000  |
| C | 3.49372100  | -0.10392600 | 1.51893500  |
| C | 3.55471800  | 0.13973500  | -0.87557200 |
| C | 4.88761100  | -0.11667000 | 1.54436000  |
| H | 2.92733000  | -0.18979400 | 2.43856600  |
| C | 4.94416500  | 0.12607900  | -0.84861800 |
| H | 3.03378900  | 0.24503100  | -1.82496900 |
| C | 5.61614000  | -0.00293000 | 0.36552900  |
| H | 5.40271200  | -0.21643300 | 2.49496500  |
| H | 5.50197400  | 0.21722200  | -1.77563300 |
| H | 6.70142300  | -0.01320300 | 0.38962900  |
| H | -1.95549600 | 2.84566100  | 0.24069100  |
| H | -1.29666300 | 4.44419500  | -1.45442800 |
| H | 0.47830300  | 4.02055100  | 0.30343500  |
| H | 1.87866700  | 2.34679000  | -1.83211100 |
| C | 0.71445700  | -1.22221000 | -0.43301800 |
| C | 1.56036600  | -2.35240300 | -0.95103000 |
| C | -0.61604400 | -1.26843900 | -0.32894500 |
| C | 0.69438300  | -3.45710500 | -1.56059800 |
| H | 2.16462700  | -2.74823200 | -0.12168100 |
| H | 2.28298500  | -1.98916100 | -1.69011200 |
| C | -1.42547100 | -2.50984600 | -0.61138500 |
| C | -0.51903200 | -3.74060200 | -0.67736800 |
| H | 1.29523200  | -4.36071100 | -1.70428400 |
| H | 0.34659800  | -3.14043200 | -2.55269200 |
| H | -2.18785400 | -2.62746300 | 0.16742900  |
| H | -1.97876200 | -2.40665000 | -1.55412200 |
| H | -1.08400000 | -4.59902800 | -1.05462700 |
| H | -0.17815500 | -3.99463600 | 0.33451400  |

Electronic energy (M06-2X/6-311+G(d,p)/SMD(MeCN)) = -1194.8156 Hartrees

Zero-point correction = 0.469826 Hartrees

Thermal correction to enthalpy = 0.493604 Hartrees

Thermal correction to Gibbs free energy = 0.418365 Hartrees

Quasiharmonic free energy correction = 0.42146089 Hartrees

### bicyclic lactone **32**

|   |             |            |             |
|---|-------------|------------|-------------|
| C | -0.65181600 | 3.30160200 | -1.67304000 |
| C | -1.53528200 | 2.24786900 | -1.00169900 |
| C | -0.70907000 | 1.12647600 | -0.43276900 |
| C | 0.62336200  | 1.15743500 | -0.33268200 |
| C | 1.45398000  | 2.36628400 | -0.68303300 |
| C | 0.57222200  | 3.60906300 | -0.81350000 |
| H | -1.23633200 | 4.20733900 | -1.86256900 |

|   |             |             |             |
|---|-------------|-------------|-------------|
| H | -2.26830000 | 1.86281700  | -1.71830700 |
| C | -1.32723100 | -0.10534300 | 0.24111800  |
| C | 1.24626800  | -0.08496900 | 0.34907900  |
| H | 2.22215100  | 2.51059100  | 0.08533100  |
| H | 0.24320300  | 3.92670300  | 0.18413000  |
| C | 0.53421000  | -0.07262600 | 1.72261000  |
| O | 1.03604500  | -0.02983400 | 2.81275400  |
| O | -0.81068600 | -0.10924600 | 1.60442800  |
| C | 2.76495500  | -0.06055000 | 0.33970400  |
| C | 3.37718600  | -0.06220600 | -0.92296900 |
| C | 3.58025000  | -0.03184200 | 1.47198700  |
| C | 4.75837200  | -0.03141300 | -1.05602400 |
| H | 2.75169900  | -0.09924200 | -1.81284200 |
| C | 4.96945600  | -0.00064600 | 1.33606500  |
| H | 3.13504300  | -0.03246800 | 2.45710100  |
| C | 5.56427700  | 0.00110000  | 0.08130100  |
| H | 5.20531800  | -0.03424300 | -2.04565700 |
| H | 5.58648700  | 0.02133500  | 2.22928800  |
| H | 6.64548000  | 0.02567200  | -0.01478700 |
| C | -2.83523700 | -0.08347300 | 0.33254100  |
| C | -3.48724300 | 0.05657900  | 1.55686700  |
| C | -3.59681900 | -0.18047300 | -0.83714700 |
| C | -4.87919100 | 0.09794400  | 1.60840400  |
| H | -2.90274300 | 0.12807000  | 2.46610500  |
| C | -4.98561500 | -0.13936100 | -0.78311800 |
| H | -3.09715900 | -0.29816400 | -1.79606600 |
| C | -5.63188700 | 0.00091900  | 0.44314800  |
| H | -5.37405100 | 0.20645000  | 2.56866000  |
| H | -5.56229300 | -0.21719300 | -1.69970200 |
| H | -6.71608800 | 0.03317600  | 0.48759100  |
| H | 2.00106100  | 2.19473200  | -1.61974500 |
| H | 1.15173600  | 4.43290000  | -1.24193700 |
| H | -0.31628400 | 2.92479900  | -2.64804600 |
| H | -2.12668500 | 2.69716300  | -0.19069600 |
| C | 0.66953200  | -1.34909000 | -0.31203200 |
| C | -0.72560200 | -1.35243800 | -0.39935300 |
| C | 1.39446900  | -2.45872700 | -0.72582900 |
| C | -1.40030200 | -2.45033400 | -0.91247800 |
| C | 0.71870500  | -3.55336500 | -1.26870200 |
| H | 2.47471300  | -2.47749200 | -0.62899700 |
| C | -0.66733800 | -3.54921900 | -1.36453100 |
| H | -2.48448800 | -2.46778700 | -0.94310600 |
| H | 1.28415900  | -4.41723600 | -1.60420600 |
| H | -1.18718500 | -4.41047800 | -1.77250400 |

Electronic energy (M06-2X/6-311+G(d,p)/SMD(MeCN)) = -1192.4247 Hartrees

Zero-point correction = 0.423221 Hartrees

Thermal correction to enthalpy = 0.445841 Hartrees

Thermal correction to Gibbs free energy = 0.373099 Hartrees

Quasiharmonic free energy correction = 0.37586229 Hartrees

tricyclic product **33**

|   |             |             |             |
|---|-------------|-------------|-------------|
| C | 0.64160700  | 3.64897000  | -0.71651500 |
| C | 1.48794700  | 2.49014600  | -0.20001900 |
| C | 0.69811100  | 1.20408800  | -0.02267800 |
| C | -0.70249500 | 1.20793900  | -0.00792100 |
| C | -1.48997200 | 2.50302100  | -0.12359400 |
| C | -0.63952100 | 3.74975400  | 0.10275000  |
| C | 1.39477200  | -0.01236000 | 0.12128000  |
| C | -1.40169500 | -0.00944500 | 0.11524300  |
| C | -0.70699200 | -1.21250200 | 0.25077600  |
| C | 0.69707200  | -1.21258200 | 0.26487500  |
| C | 1.35419300  | -2.55931400 | 0.44301300  |
| H | 2.44112400  | -2.49035300 | 0.36408100  |
| C | 0.80560700  | -3.57976100 | -0.57184000 |
| C | -0.73631000 | -3.52029400 | -0.69353400 |
| C | -1.37083600 | -2.56585200 | 0.33400400  |
| H | 0.38277400  | 3.47932200  | -1.77030200 |
| H | 2.33417800  | 2.30350300  | -0.87010800 |
| H | -1.94543100 | 2.56023400  | -1.12240900 |
| H | -1.21463400 | 4.64276400  | -0.16282200 |
| H | 1.26159000  | -3.38025600 | -1.54731500 |
| H | -1.01617300 | -3.16821500 | -1.69180300 |
| H | -2.44703800 | -2.49024700 | 0.16277100  |
| C | 2.88973200  | -0.01075200 | 0.11125000  |
| C | 3.59291200  | -0.44338800 | -1.01743700 |
| C | 3.61130200  | 0.42655600  | 1.22524500  |
| C | 4.98497000  | -0.43867000 | -1.03259100 |
| H | 3.03534300  | -0.78424300 | -1.88656700 |
| C | 5.00335700  | 0.43221900  | 1.21271500  |
| H | 3.07006000  | 0.75810400  | 2.10788500  |
| C | 5.69370600  | 0.00053300  | 0.08297600  |
| H | 5.51700400  | -0.77636500 | -1.91714200 |
| H | 5.55011600  | 0.77104800  | 2.08779400  |
| H | 6.77935100  | 0.00508200  | 0.07227100  |
| C | -2.89638500 | -0.00912200 | 0.09778700  |
| C | -3.62527400 | -0.21246900 | 1.27317100  |
| C | -3.59263000 | 0.18635200  | -1.09838300 |
| C | -5.01760500 | -0.21827300 | 1.25408600  |
| H | -3.08955000 | -0.36918500 | 2.20598500  |
| C | -4.98448200 | 0.17927200  | -1.12054100 |

|   |             |             |             |
|---|-------------|-------------|-------------|
| H | -3.03204300 | 0.33796500  | -2.01747500 |
| C | -5.70080700 | -0.02186400 | 0.05667300  |
| H | -5.56881700 | -0.37809300 | 2.17606400  |
| H | -5.50980700 | 0.32870000  | -2.05918100 |
| H | -6.78638600 | -0.02762300 | 0.04064400  |
| H | -1.23961800 | -2.98267800 | 1.34302000  |
| H | -1.17139400 | -4.51813100 | -0.57988400 |
| H | 1.13084400  | -4.58206100 | -0.27532600 |
| H | 1.13578200  | -2.92111300 | 1.45772200  |
| H | -2.33017000 | 2.47723200  | 0.57916600  |
| H | 1.21848600  | 4.57850800  | -0.67192300 |
| H | 1.93377600  | 2.77614300  | 0.76341600  |
| H | -0.38108100 | 3.83673800  | 1.16669300  |

Electronic energy (M06-2X/6-311+G(d,p)/SMD(MeCN)) = -1006.299 Hartrees

Zero-point correction = 0.453960 Hartrees

Thermal correction to enthalpy = 0.476172 Hartrees

Thermal correction to Gibbs free energy = 0.402166 Hartrees

Quasiharmonic free energy correction = 0.4072234 Hartrees

carbon dioxide (**34**)

|   |            |            |             |
|---|------------|------------|-------------|
| C | 0.00000000 | 0.00000000 | 0.00000000  |
| O | 0.00000000 | 0.00000000 | 1.16290100  |
| O | 0.00000000 | 0.00000000 | -1.16290100 |

Electronic energy (M06-2X/6-311+G(d,p)/SMD(MeCN)) = -188.57523 Hartrees

Zero-point correction = 0.011960 Hartrees

Thermal correction to enthalpy = 0.015523 Hartrees

Thermal correction to Gibbs free energy = -0.008737 Hartrees

dinitrogen

|   |            |            |             |
|---|------------|------------|-------------|
| N | 0.00000000 | 0.00000000 | 0.54938200  |
| N | 0.00000000 | 0.00000000 | -0.54938200 |

Electronic energy (M06-2X/6-311+G(d,p)/SMD(MeCN)) = -109.51676 Hartrees

Zero-point correction = 0.005767 Hartrees

Thermal correction to enthalpy = 0.009072 Hartrees

Thermal correction to Gibbs free energy = -0.012671 Hartrees

tricyclic product **35**

|   |             |            |             |
|---|-------------|------------|-------------|
| C | 0.64304000  | 3.64477500 | -0.40821200 |
| C | 1.49082200  | 2.43557200 | -0.02442900 |
| C | 0.71450800  | 1.12813700 | -0.00696400 |
| C | -0.71453400 | 1.12813000 | 0.00660400  |

|   |             |             |             |
|---|-------------|-------------|-------------|
| C | -1.49081800 | 2.43558100  | 0.02420500  |
| C | -0.64303200 | 3.64466000  | 0.40836500  |
| C | 1.40575600  | -0.07030700 | 0.00244000  |
| C | -1.40577300 | -0.07032700 | -0.00275500 |
| C | -0.71123200 | -1.31642500 | -0.00758400 |
| C | 0.71124000  | -1.31641300 | 0.00725900  |
| C | 1.39656800  | -2.56300200 | 0.03216000  |
| C | 0.70677100  | -3.74735100 | 0.02001100  |
| C | -0.70671100 | -3.74735900 | -0.02048700 |
| C | -1.39652800 | -2.56303100 | -0.03258100 |
| H | 0.39289500  | 3.60431200  | -1.47686600 |
| H | 2.34843400  | 2.33580400  | -0.69792600 |
| H | -1.91811700 | 2.60878800  | -0.97369200 |
| H | -1.21768700 | 4.56265800  | 0.24755700  |
| H | 1.24637800  | -4.68935000 | 0.04040700  |
| H | -1.24630200 | -4.68936700 | -0.04096200 |
| C | 2.89986100  | -0.07185600 | 0.00675100  |
| C | 3.61442400  | -0.36689200 | -1.15842500 |
| C | 3.60753000  | 0.22056300  | 1.17575200  |
| C | 5.00666000  | -0.36361200 | -1.15590300 |
| H | 3.06727400  | -0.60191900 | -2.06765800 |
| C | 4.99967800  | 0.22326800  | 1.18042900  |
| H | 3.05601300  | 0.44155900  | 2.08593600  |
| C | 5.70239600  | -0.06739000 | 0.01379600  |
| H | 5.54869500  | -0.59352100 | -2.06832500 |
| H | 5.53620300  | 0.45017900  | 2.09685800  |
| H | 6.78809900  | -0.06538900 | 0.01653200  |
| C | -2.89987500 | -0.07191600 | -0.00680200 |
| C | -3.61415400 | -0.36745600 | 1.15841600  |
| C | -3.60783600 | 0.22101100  | -1.17550900 |
| C | -5.00639200 | -0.36413100 | 1.15625500  |
| H | -3.06678100 | -0.60288400 | 2.06741100  |
| C | -4.99997900 | 0.22375400  | -1.17982900 |
| H | -3.05653200 | 0.44236800  | -2.08573300 |
| C | -5.70241200 | -0.06737600 | -0.01313400 |
| H | -5.54820200 | -0.59439500 | 2.06872100  |
| H | -5.53674200 | 0.45107500  | -2.09601600 |
| H | -6.78811600 | -0.06533100 | -0.01560400 |
| H | -2.48116300 | -2.56455500 | -0.06485000 |
| H | 2.48120500  | -2.56449800 | 0.06436300  |
| H | -2.34853100 | 2.33570800  | 0.69755500  |
| H | 1.21771100  | 4.56271600  | -0.24712900 |
| H | 1.91829300  | 2.60853000  | 0.97343600  |
| H | -0.39289500 | 3.60386200  | 1.47701000  |

Electronic energy (M06-2X/6-311+G(d,p)/SMD(MeCN)) = -1003.8963 Hartrees

Zero-point correction = 0.406593 Hartrees

Thermal correction to enthalpy = 0.427726 Hartrees

Thermal correction to Gibbs free energy = 0.356116 Hartrees

Quasiharmonic free energy correction = 0.36087543 Hartrees

**TS-1**

|   |             |             |             |
|---|-------------|-------------|-------------|
| C | 0.66177300  | 3.81309800  | -0.17619500 |
| C | 1.46703900  | 2.67038000  | -0.32504900 |
| C | 0.71123900  | 1.52024700  | -0.19748900 |
| C | -0.52091300 | 1.45664100  | 0.04208300  |
| C | -1.39597600 | 2.51282700  | 0.21046400  |
| C | -0.71784100 | 3.73729300  | 0.08146000  |
| H | 1.12289600  | 4.79268400  | -0.26943600 |
| H | 2.53301000  | 2.72198800  | -0.51921600 |
| C | -1.27007700 | -0.95218200 | -0.08409000 |
| H | -2.45984700 | 2.44075100  | 0.41153900  |
| H | -1.28221800 | 4.66040700  | 0.18157300  |
| C | -0.57193500 | -1.07866400 | 1.22010300  |
| N | -0.62899100 | -1.16324300 | -1.21070900 |
| N | 0.71034400  | -1.13441900 | -1.24068300 |
| O | -1.05017100 | -1.19264000 | 2.31171300  |
| O | 0.79783900  | -1.13620900 | 1.09405600  |
| C | -2.74513600 | -0.82646000 | -0.13612400 |
| C | -3.40964500 | -1.15580700 | -1.32505800 |
| C | -3.48340400 | -0.33663800 | 0.94873800  |
| C | -4.78639700 | -1.00974400 | -1.42138400 |
| H | -2.82908500 | -1.52134600 | -2.16452700 |
| C | -4.86293500 | -0.18455800 | 0.84009100  |
| H | -2.98200600 | -0.08113500 | 1.87403500  |
| C | -5.51841400 | -0.52260200 | -0.33960400 |
| H | -5.29135800 | -1.27493400 | -2.34505800 |
| H | -5.42575600 | 0.19566300  | 1.68705300  |
| H | -6.59533000 | -0.40768000 | -0.41756500 |
| C | 2.82945600  | -0.85544900 | -0.09877000 |
| C | 3.51684100  | -0.79075300 | 1.11595100  |
| C | 3.52545500  | -0.76729300 | -1.30945300 |
| C | 4.89989800  | -0.64465100 | 1.11619500  |
| H | 2.96795500  | -0.85435100 | 2.04908300  |
| C | 4.90593500  | -0.62120200 | -1.29865000 |
| H | 2.96896000  | -0.81496100 | -2.23917000 |
| C | 5.59507100  | -0.56075100 | -0.08743100 |
| H | 5.43481100  | -0.59581800 | 2.05923300  |
| H | 5.44725200  | -0.55499100 | -2.23704300 |
| H | 6.67474000  | -0.44664000 | -0.08308100 |
| C | 1.36415900  | -0.99460200 | -0.12142800 |

Electronic energy (M06-2X/6-311+G(d,p)/SMD(MeCN)) = -1068.3213 Hartrees

Zero-point correction = 0.298025 Hartrees

Thermal correction to enthalpy = 0.318530 Hartrees

Thermal correction to Gibbs free energy = 0.246690 Hartrees

Quasiharmonic free energy correction = 0.25267384 Hartrees

**TS-2**

|   |             |             |             |
|---|-------------|-------------|-------------|
| C | 0.85285300  | 3.47779600  | 0.16469300  |
| C | 1.63397800  | 2.36355700  | -0.60698200 |
| C | 0.67166800  | 1.23614100  | -0.60495600 |
| C | -0.53610900 | 1.23270000  | -0.37583900 |
| C | -1.47221500 | 2.28889300  | 0.06175700  |
| C | -0.63988700 | 3.58665300  | -0.20806800 |
| H | 1.33863100  | 4.44417600  | -0.01217600 |
| H | 2.58274100  | 2.13476000  | -0.10934700 |
| C | 1.32923700  | -1.09518300 | 0.00340500  |
| C | -1.28519400 | -1.02562000 | 0.04902900  |
| H | -2.41939700 | 2.30593800  | -0.48566400 |
| H | -0.72448100 | 3.82584800  | -1.27493600 |
| C | -0.57863700 | -0.78804000 | 1.33028800  |
| N | -0.66231400 | -1.59116900 | -0.97003500 |
| N | 0.66872400  | -1.56031900 | -1.02507200 |
| O | -1.04325800 | -0.51591600 | 2.40291500  |
| O | 0.78083000  | -0.96475100 | 1.23277500  |
| C | -2.75565400 | -0.86586300 | -0.05943400 |
| C | -3.30266400 | -0.76603600 | -1.34738800 |
| C | -3.60518000 | -0.78891800 | 1.05061700  |
| C | -4.66941600 | -0.60198900 | -1.52141900 |
| H | -2.63442000 | -0.81593300 | -2.20062000 |
| C | -4.97628600 | -0.62666200 | 0.86651700  |
| H | -3.19821400 | -0.85784000 | 2.05060900  |
| C | -5.51274300 | -0.53145100 | -0.41290700 |
| H | -5.07872700 | -0.52271500 | -2.52388900 |
| H | -5.62653200 | -0.57589500 | 1.73442200  |
| H | -6.58194800 | -0.39901500 | -0.54882200 |
| C | 2.79295100  | -0.93877100 | -0.02527300 |
| C | 3.47803600  | -0.49324900 | 1.10850100  |
| C | 3.48807800  | -1.19941600 | -1.21058200 |
| C | 4.85687600  | -0.31444500 | 1.05443500  |
| H | 2.92934600  | -0.29049700 | 2.02205600  |
| C | 4.86401200  | -1.02023900 | -1.25425100 |
| H | 2.93372200  | -1.53760600 | -2.07927700 |
| C | 5.55069600  | -0.57738200 | -0.12371000 |
| H | 5.38944400  | 0.02889600  | 1.93577200  |



|   |             |             |             |
|---|-------------|-------------|-------------|
| H | 5.40433200  | -1.22672900 | -2.17262300 |
| H | 6.62668500  | -0.43774500 | -0.16223200 |
| H | -1.70443600 | 2.16429300  | 1.12634800  |
| H | -1.08942700 | 4.41799200  | 0.34627100  |
| H | 0.93608400  | 3.26443500  | 1.23715600  |
| H | 1.86475300  | 2.66853000  | -1.63343200 |

Electronic energy (M06-2X/6-311+G(d,p)/SMD(MeCN)) = -1070.7386 Hartrees

Zero-point correction = 0.345467 Hartrees

Thermal correction to enthalpy = 0.366875 Hartrees

Thermal correction to Gibbs free energy = 0.293906 Hartrees

Quasiharmonic free energy correction = 0.29962022 Hartrees

### TS-3

|   |             |             |             |
|---|-------------|-------------|-------------|
| C | -0.64139400 | -3.30409100 | -1.94573700 |
| C | -1.46062400 | -2.12080500 | -1.43648000 |
| C | -0.71586400 | -1.32916500 | -0.37976000 |
| C | 0.71208500  | -1.31626800 | -0.34253400 |
| C | 1.51100600  | -2.22001100 | -1.26497500 |
| C | 0.71344300  | -2.80164400 | -2.43000100 |
| H | -1.18609600 | -3.80609600 | -2.75139300 |
| H | -2.42448000 | -2.45409200 | -1.03997100 |
| C | -1.38369200 | -0.54698100 | 0.53532000  |
| C | 1.36277300  | -0.47583200 | 0.54136200  |
| H | 2.39751400  | -1.70008600 | -1.62996300 |
| H | 0.55606600  | -2.03092700 | -3.19568100 |
| C | 0.62763700  | 0.08555000  | 1.67778900  |
| O | 1.09494900  | 0.58101900  | 2.67062600  |
| O | -0.74349900 | -0.01147900 | 1.59651200  |
| C | 2.83902700  | -0.29138000 | 0.56739400  |
| C | 3.50206900  | 0.26155000  | -0.53438600 |
| C | 3.58643800  | -0.65316700 | 1.69238700  |
| C | 4.88269200  | 0.43160100  | -0.52167900 |
| H | 2.91956000  | 0.56995800  | -1.39942800 |
| C | 4.96802500  | -0.48710100 | 1.70287200  |
| H | 3.07743700  | -1.05062500 | 2.56365600  |
| C | 5.62014800  | 0.05322200  | 0.59766100  |
| H | 5.38076800  | 0.86509900  | -1.38360000 |
| H | 5.53583300  | -0.77467200 | 2.58233900  |
| H | 6.69748700  | 0.18675000  | 0.61133000  |
| C | -2.84892800 | -0.37197800 | 0.65834100  |
| C | -3.43322300 | -0.37630000 | 1.93000300  |
| C | -3.65877900 | -0.16795000 | -0.46429600 |
| C | -4.80658000 | -0.21226500 | 2.07012600  |
| H | -2.80218500 | -0.50486100 | 2.80271000  |

|   |             |             |             |
|---|-------------|-------------|-------------|
| C | -5.03132600 | 0.00150900  | -0.31952800 |
| H | -3.20536900 | -0.10950500 | -1.44859300 |
| C | -5.60960800 | -0.02699900 | 0.94730900  |
| H | -5.25009500 | -0.22431000 | 3.06069500  |
| H | -5.64819700 | 0.16642100  | -1.19736900 |
| H | -6.68118900 | 0.10517500  | 1.05952100  |
| H | 1.88863800  | -3.04428100 | -0.64234800 |
| H | 1.29155200  | -3.60443800 | -2.89805100 |
| H | -0.49992600 | -4.03761200 | -1.14136200 |
| H | -1.68132800 | -1.47161700 | -2.29536600 |
| C | -0.78405200 | 1.60418600  | -0.82893400 |
| C | -1.60032300 | 2.58057000  | -1.37670500 |
| C | 0.44331500  | 1.74416400  | -0.58085300 |
| C | -0.89161600 | 3.76142700  | -1.65577000 |
| H | -2.66565500 | 2.48827300  | -1.56744200 |
| C | 1.22947200  | 2.85971900  | -0.79521500 |
| C | 0.47763800  | 3.89693300  | -1.37416500 |
| H | -1.42217300 | 4.60291700  | -2.09336700 |
| H | 2.28182600  | 2.96216400  | -0.55094000 |
| H | 0.96986100  | 4.83910600  | -1.59975400 |

Electronic energy (M06-2X/6-311+G(d,p)/SMD(MeCN)) = -1192.2932 Hartrees

Zero-point correction = 0.417366 Hartrees

Thermal correction to enthalpy = 0.441645 Hartrees

Thermal correction to Gibbs free energy = 0.363015 Hartrees

Quasiharmonic free energy correction = 0.36822571 Hartrees

#### TS-4

|   |             |             |             |
|---|-------------|-------------|-------------|
| C | 0.52462600  | 3.81109000  | -0.34235100 |
| C | 1.42164600  | 2.59956700  | -0.59238300 |
| C | 0.66687000  | 1.30195100  | -0.40496100 |
| C | -0.68332700 | 1.22998200  | -0.30070900 |
| C | -1.56952700 | 2.43949400  | -0.46268400 |
| C | -0.81464000 | 3.63054200  | -1.05054500 |
| H | 1.02835200  | 4.72288100  | -0.67830000 |
| H | 2.28188800  | 2.61484400  | 0.08515700  |
| C | 1.35690700  | 0.06580400  | -0.07942900 |
| C | -1.24768000 | -0.06108500 | 0.16032400  |
| H | -2.43187300 | 2.17966400  | -1.08669200 |
| H | -0.63630100 | 3.45850500  | -2.12019000 |
| C | -0.52968500 | -0.21673800 | 1.77677400  |
| O | -1.31282500 | -0.51600000 | 2.64956400  |
| O | 0.70963100  | -0.03415800 | 1.77791900  |
| C | -2.76273000 | -0.08713900 | 0.12613700  |
| C | -3.36862100 | -0.38921000 | -1.10105500 |

|   |             |             |             |
|---|-------------|-------------|-------------|
| C | -3.58083000 | 0.30892900  | 1.18711500  |
| C | -4.74852000 | -0.33343500 | -1.26015400 |
| H | -2.74157900 | -0.65071600 | -1.95070800 |
| C | -4.96477600 | 0.36389300  | 1.02802000  |
| H | -3.13836600 | 0.55789600  | 2.14208800  |
| C | -5.55539400 | 0.03930400  | -0.18797400 |
| H | -5.19131700 | -0.57282500 | -2.22242400 |
| H | -5.58255500 | 0.66619300  | 1.86833000  |
| H | -6.63404100 | 0.08417000  | -0.30402100 |
| C | 2.84420700  | 0.10253500  | 0.08741300  |
| C | 3.47815300  | -0.10536400 | 1.31253400  |
| C | 3.61609600  | 0.32076500  | -1.05947700 |
| C | 4.86977400  | -0.08452800 | 1.38378500  |
| H | 2.88034700  | -0.27667900 | 2.19892900  |
| C | 5.00435500  | 0.33611300  | -0.98207900 |
| H | 3.12271900  | 0.47651200  | -2.01653000 |
| C | 5.63547700  | 0.13482000  | 0.24325600  |
| H | 5.35536400  | -0.24245000 | 2.34193700  |
| H | 5.59122400  | 0.50705500  | -1.87940100 |
| H | 6.71911300  | 0.14876300  | 0.30675900  |
| H | -1.98953200 | 2.70241500  | 0.51897700  |
| H | -1.42934900 | 4.53238500  | -0.96908700 |
| H | 0.34975000  | 3.91496700  | 0.73623500  |
| H | 1.83699100  | 2.65069900  | -1.60892400 |
| C | 0.77460500  | -1.19414100 | -0.51565800 |
| C | 1.65256100  | -2.38267300 | -0.82386800 |
| C | -0.57186500 | -1.27654100 | -0.36666500 |
| C | 0.82855700  | -3.59851800 | -1.24450800 |
| H | 2.24414900  | -2.62248500 | 0.07110500  |
| H | 2.38193900  | -2.12358400 | -1.60039100 |
| C | -1.30765000 | -2.59553400 | -0.40648600 |
| C | -0.35290600 | -3.78339400 | -0.29456300 |
| H | 1.46570000  | -4.48815600 | -1.25922200 |
| H | 0.45115400  | -3.45499200 | -2.26568600 |
| H | -2.04489400 | -2.60340200 | 0.40458900  |
| H | -1.88603200 | -2.67237800 | -1.33653400 |
| H | -0.89066100 | -4.71188600 | -0.51026800 |
| H | 0.01927500  | -3.85507000 | 0.73555800  |

Electronic energy (M06-2X/6-311+G(d,p)/SMD(MeCN)) = -1194.7888 Hartrees

Zero-point correction = 0.466863 Hartrees

Thermal correction to enthalpy = 0.490974 Hartrees

Thermal correction to Gibbs free energy = 0.414777 Hartrees

Quasiharmonic free energy correction = 0.4182318 Hartrees

## TS-5

|   |             |             |             |
|---|-------------|-------------|-------------|
| C | 0.96472500  | -3.50532400 | -1.08847500 |
| C | 1.58963500  | -2.29943500 | -0.84951200 |
| C | 0.82272300  | -1.17061700 | -0.49922800 |
| C | -0.57837700 | -1.26850000 | -0.35990300 |
| C | -1.18444000 | -2.52368600 | -0.53531200 |
| C | -0.42400600 | -3.61444500 | -0.91666600 |
| C | 1.42073200  | 0.09496800  | -0.14554300 |
| C | -1.27490900 | -0.07662200 | 0.17060600  |
| C | -0.71622600 | 1.21394600  | -0.28821700 |
| C | 0.68654500  | 1.30975200  | -0.40350800 |
| C | 1.29976500  | 2.55494300  | -0.64424500 |
| H | 2.38120100  | 2.62844600  | -0.66496500 |
| C | 0.52086700  | 3.67280100  | -0.85885800 |
| C | -0.87671700 | 3.57279000  | -0.78785100 |
| C | -1.48871400 | 2.37051000  | -0.48287800 |
| H | 1.54633300  | -4.37223200 | -1.38375600 |
| H | 2.66709800  | -2.20618200 | -0.93904400 |
| H | -2.25066500 | -2.63177800 | -0.37231000 |
| H | -0.90977600 | -4.57286000 | -1.07369300 |
| H | 0.98845100  | 4.62919700  | -1.06867300 |
| H | -1.48759400 | 4.45387200  | -0.96068000 |
| H | -2.56836700 | 2.31358900  | -0.40053000 |
| C | -2.78733900 | -0.10999800 | 0.12760900  |
| C | -3.60319600 | 0.31329400  | 1.18025100  |
| C | -3.39384700 | -0.43102200 | -1.09493100 |
| C | -4.98667100 | 0.37493800  | 1.01939700  |
| H | -3.15848400 | 0.58597800  | 2.12740000  |
| C | -4.77359900 | -0.36983500 | -1.25436100 |
| H | -2.76944400 | -0.72235700 | -1.93614900 |
| C | -5.57855700 | 0.02959900  | -0.19048200 |
| H | -5.60273800 | 0.69909000  | 1.85274400  |
| H | -5.21719700 | -0.62520600 | -2.21214000 |
| H | -6.65684200 | 0.07945100  | -0.30830300 |
| C | 2.89584600  | 0.13394100  | 0.04770200  |
| C | 3.47548300  | -0.25688100 | 1.25661000  |
| C | 3.71232000  | 0.48685300  | -1.03313900 |
| C | 4.86173400  | -0.26494100 | 1.38466800  |
| H | 2.83421100  | -0.53751500 | 2.08357400  |
| C | 5.09716700  | 0.46305800  | -0.89973800 |
| H | 3.25946200  | 0.76478100  | -1.98159200 |
| C | 5.67421400  | 0.09297900  | 0.31226300  |
| H | 5.30761400  | -0.55967600 | 2.32962900  |
| H | 5.72254500  | 0.73318900  | -1.74484900 |
| H | 6.75446800  | 0.07866100  | 0.41839700  |

|   |             |             |            |
|---|-------------|-------------|------------|
| C | -0.55670300 | -0.21469600 | 1.84525700 |
| O | 0.66561900  | -0.00367600 | 1.83794700 |
| O | -1.36949600 | -0.52240800 | 2.68278300 |

Electronic energy (M06-2X/6-311+G(d,p)/SMD(MeCN)) = -1192.3902 Hartrees

Zero-point correction = 0.419918 Hartrees

Thermal correction to enthalpy = 0.443031 Hartrees

Thermal correction to Gibbs free energy = 0.368475 Hartrees

Quasiharmonic free energy correction = 0.37229192 Hartrees

## TS-6

|   |             |             |             |
|---|-------------|-------------|-------------|
| C | 0.96472500  | -3.50532400 | -1.08847500 |
| C | 1.58963500  | -2.29943500 | -0.84951200 |
| C | 0.82272300  | -1.17061700 | -0.49922800 |
| C | -0.57837700 | -1.26850000 | -0.35990300 |
| C | -1.18444000 | -2.52368600 | -0.53531200 |
| C | -0.42400600 | -3.61444500 | -0.91666600 |
| C | 1.42073200  | 0.09496800  | -0.14554300 |
| C | -1.27490900 | -0.07662200 | 0.17060600  |
| C | -0.71622600 | 1.21394600  | -0.28821700 |
| C | 0.68654500  | 1.30975200  | -0.40350800 |
| C | 1.29976500  | 2.55494300  | -0.64424500 |
| H | 2.38120100  | 2.62844600  | -0.66496500 |
| C | 0.52086700  | 3.67280100  | -0.85885800 |
| C | -0.87671700 | 3.57279000  | -0.78785100 |
| C | -1.48871400 | 2.37051000  | -0.48287800 |
| H | 1.54633300  | -4.37223200 | -1.38375600 |
| H | 2.66709800  | -2.20618200 | -0.93904400 |
| H | -2.25066500 | -2.63177800 | -0.37231000 |
| H | -0.90977600 | -4.57286000 | -1.07369300 |
| H | 0.98845100  | 4.62919700  | -1.06867300 |
| H | -1.48759400 | 4.45387200  | -0.96068000 |
| H | -2.56836700 | 2.31358900  | -0.40053000 |
| C | -2.78733900 | -0.10999800 | 0.12760900  |
| C | -3.60319600 | 0.31329400  | 1.18025100  |
| C | -3.39384700 | -0.43102200 | -1.09493100 |
| C | -4.98667100 | 0.37493800  | 1.01939700  |
| H | -3.15848400 | 0.58597800  | 2.12740000  |
| C | -4.77359900 | -0.36983500 | -1.25436100 |
| H | -2.76944400 | -0.72235700 | -1.93614900 |
| C | -5.57855700 | 0.02959900  | -0.19048200 |
| H | -5.60273800 | 0.69909000  | 1.85274400  |
| H | -5.21719700 | -0.62520600 | -2.21214000 |
| H | -6.65684200 | 0.07945100  | -0.30830300 |
| C | 2.89584600  | 0.13394100  | 0.04770200  |

|   |             |             |             |
|---|-------------|-------------|-------------|
| C | 3.47548300  | -0.25688100 | 1.25661000  |
| C | 3.71232000  | 0.48685300  | -1.03313900 |
| C | 4.86173400  | -0.26494100 | 1.38466800  |
| H | 2.83421100  | -0.53751500 | 2.08357400  |
| C | 5.09716700  | 0.46305800  | -0.89973800 |
| H | 3.25946200  | 0.76478100  | -1.98159200 |
| C | 5.67421400  | 0.09297900  | 0.31226300  |
| H | 5.30761400  | -0.55967600 | 2.32962900  |
| H | 5.72254500  | 0.73318900  | -1.74484900 |
| H | 6.75446800  | 0.07866100  | 0.41839700  |
| C | -0.55670300 | -0.21469600 | 1.84525700  |
| O | 0.66561900  | -0.00367600 | 1.83794700  |
| O | -1.36949600 | -0.52240800 | 2.68278300  |

Electronic energy (M06-2X/6-311+G(d,p)/SMD(MeCN)) = -1189.9879 Hartrees

Zero-point correction = 0.372884 Hartrees

Thermal correction to enthalpy = 0.394986 Hartrees

Thermal correction to Gibbs free energy = 0.322992 Hartrees

Quasiharmonic free energy correction = 0.32613004 Hartrees

#### TS-7

|   |             |             |             |
|---|-------------|-------------|-------------|
| C | -0.69264300 | 3.35772600  | -0.82041000 |
| C | -1.41604000 | 2.21056800  | -0.55489300 |
| C | -0.73400000 | 0.99918100  | -0.37189300 |
| C | 0.67048000  | 0.95169000  | -0.41793000 |
| C | 1.39275000  | 2.13274700  | -0.66228700 |
| C | 0.71042700  | 3.31529600  | -0.87467700 |
| H | -1.21093200 | 4.29445800  | -0.99776300 |
| H | -2.50056200 | 2.23032900  | -0.51614500 |
| C | -1.34745200 | -0.28090200 | -0.02583900 |
| C | 1.26877800  | -0.34582500 | -0.10308400 |
| H | 2.47668300  | 2.09990100  | -0.69824500 |
| H | 1.26575700  | 4.22289100  | -1.08969000 |
| C | 0.56671800  | -1.46725300 | -0.77834400 |
| N | 0.49721300  | -0.66393700 | 1.58786500  |
| N | -0.66377300 | -0.56118600 | 1.59315900  |
| O | 1.03971800  | -2.43466300 | -1.31040500 |
| O | -0.79917400 | -1.35350400 | -0.70532200 |
| C | 2.73964100  | -0.42847500 | 0.10929100  |
| C | 3.28358100  | 0.26969100  | 1.19455400  |
| C | 3.59293200  | -1.12872000 | -0.74811700 |
| C | 4.65387600  | 0.26639300  | 1.42339500  |
| H | 2.61925500  | 0.80993300  | 1.86404200  |
| C | 4.96638400  | -1.12544700 | -0.51659600 |
| H | 3.18098700  | -1.67804400 | -1.58515100 |

|   |             |             |             |
|---|-------------|-------------|-------------|
| C | 5.50012800  | -0.43302600 | 0.56557000  |
| H | 5.06057400  | 0.80583500  | 2.27327700  |
| H | 5.62075700  | -1.67276800 | -1.18811800 |
| H | 6.57132000  | -0.43890400 | 0.74264000  |
| C | -2.82152900 | -0.41575900 | 0.11118800  |
| C | -3.54195700 | -1.26748200 | -0.72627600 |
| C | -3.48422200 | 0.32330800  | 1.09418500  |
| C | -4.92329700 | -1.36498000 | -0.58778100 |
| H | -3.01758900 | -1.84797000 | -1.47737300 |
| C | -4.86423500 | 0.22313200  | 1.22668200  |
| H | -2.91044000 | 0.95960300  | 1.76314400  |
| C | -5.58577700 | -0.62012800 | 0.38380100  |
| H | -5.48308400 | -2.02697200 | -1.24092500 |
| H | -5.37529300 | 0.79385500  | 1.99550800  |
| H | -6.66313000 | -0.70135500 | 0.49021700  |

Electronic energy (M06-2X/6-311+G(d,p)/SMD(MeCN)) = -1068.4452 Hartrees

Zero-point correction = 0.300931 Hartrees

Thermal correction to enthalpy = 0.320013 Hartrees

Thermal correction to Gibbs free energy = 0.254457 Hartrees

Quasiharmonic free energy correction = 0.25701985 Hartrees

### TS-8

|   |             |             |             |
|---|-------------|-------------|-------------|
| C | -0.68445000 | 3.30803000  | -0.96964700 |
| C | -1.53473200 | 2.18641700  | -0.37250500 |
| C | -0.72258500 | 0.92073400  | -0.25562800 |
| C | 0.63597900  | 0.89406600  | -0.27479000 |
| C | 1.48067600  | 2.13639800  | -0.42151000 |
| C | 0.65218100  | 3.40987100  | -0.23523700 |
| H | -1.22959700 | 4.25532500  | -0.91582100 |
| H | -2.42403600 | 1.99851300  | -0.98458900 |
| C | -1.32580200 | -0.37867900 | 0.01311000  |
| C | 1.23699100  | -0.41537700 | -0.00816600 |
| H | 2.30925100  | 2.10452500  | 0.29318300  |
| H | 0.45908000  | 3.56299500  | 0.83460600  |
| C | 0.57376300  | -1.48719800 | -0.81937900 |
| N | 0.50404500  | -0.88227600 | 1.56679000  |
| N | -0.66653800 | -0.80660900 | 1.57784600  |
| O | 1.10084700  | -2.35840500 | -1.45505400 |
| O | -0.78384600 | -1.41708800 | -0.74962200 |
| C | 2.72279300  | -0.50590100 | 0.14063300  |
| C | 3.31849700  | -0.21042000 | 1.36975200  |
| C | 3.53325300  | -0.79986700 | -0.95933200 |
| C | 4.70370500  | -0.21654800 | 1.49975400  |
| H | 2.69214900  | 0.01585800  | 2.22698000  |

|   |             |             |             |
|---|-------------|-------------|-------------|
| C | 4.91856500  | -0.80283000 | -0.82550500 |
| H | 3.07665600  | -1.04030300 | -1.91262100 |
| C | 5.50718800  | -0.51323700 | 0.40207600  |
| H | 5.15481300  | 0.00793800  | 2.46147000  |
| H | 5.53831300  | -1.03768700 | -1.68535000 |
| H | 6.58807600  | -0.52018500 | 0.50416200  |
| C | -2.80653700 | -0.51172300 | 0.11060300  |
| C | -3.53207000 | -1.17985500 | -0.87543800 |
| C | -3.47112700 | 0.06889700  | 1.19230000  |
| C | -4.91903800 | -1.25477500 | -0.78204200 |
| H | -3.00717900 | -1.64215800 | -1.70453200 |
| C | -4.85636000 | -0.00741200 | 1.28067100  |
| H | -2.89728900 | 0.55957200  | 1.97392900  |
| C | -5.58263000 | -0.66816400 | 0.29205000  |
| H | -5.48069100 | -1.77644200 | -1.55059500 |
| H | -5.36816200 | 0.44123000  | 2.12624300  |
| H | -6.66411900 | -0.73103100 | 0.36321600  |
| H | 1.94687400  | 2.12675700  | -1.41687900 |
| H | 1.22368800  | 4.27569000  | -0.58361500 |
| H | -0.50079800 | 3.09905700  | -2.03131600 |
| H | -1.90513500 | 2.49191500  | 0.61586000  |

Electronic energy (M06-2X/6-311+G(d,p)/SMD(MeCN)) = -1070.8472 Hartrees

Zero-point correction = 0.348105 Hartrees

Thermal correction to enthalpy = 0.368254 Hartrees

Thermal correction to Gibbs free energy = 0.300230 Hartrees

Quasiharmonic free energy correction = 0.30322944 Hartrees

### TS-9

|   |             |             |             |
|---|-------------|-------------|-------------|
| C | -0.57659000 | -3.90971500 | -0.89874600 |
| C | -1.40034600 | -2.62712300 | -0.81680300 |
| C | -0.67205900 | -1.53969000 | -0.05333100 |
| C | 0.74228000  | -1.50621300 | -0.00184200 |
| C | 1.56536100  | -2.66015000 | -0.54420200 |
| C | 0.79632400  | -3.59034400 | -1.47933400 |
| H | -1.10308400 | -4.64473700 | -1.51598100 |
| H | -2.37522600 | -2.81752900 | -0.35704700 |
| C | -1.35022800 | -0.47715500 | 0.52205600  |
| C | 1.36572900  | -0.37722400 | 0.52029900  |
| H | 2.46872500  | -2.28785000 | -1.03002300 |
| H | 0.66731200  | -3.10981400 | -2.45799600 |
| C | 0.62152900  | 0.49930200  | 1.42855100  |
| O | 1.08385400  | 1.34263500  | 2.15991600  |
| O | -0.73500000 | 0.30310200  | 1.45086300  |
| C | 2.83750200  | -0.16114900 | 0.46361700  |



|   |             |             |             |
|---|-------------|-------------|-------------|
| C | 3.47614700  | 0.00064800  | -0.77137300 |
| C | 3.60452200  | -0.10379000 | 1.63097700  |
| C | 4.85181200  | 0.19014000  | -0.84262800 |
| H | 2.87385100  | -0.01063100 | -1.67735800 |
| C | 4.98206300  | 0.08297300  | 1.55990400  |
| H | 3.11374300  | -0.19245900 | 2.59431100  |
| C | 5.60978600  | 0.22727300  | 0.32566800  |
| H | 5.33021000  | 0.31703700  | -1.80908500 |
| H | 5.56583000  | 0.12167900  | 2.47455500  |
| H | 6.68382600  | 0.37810600  | 0.27428000  |
| C | -2.81913300 | -0.29052300 | 0.56591600  |
| C | -3.42763200 | 0.11793300  | 1.75826300  |
| C | -3.61153300 | -0.47165000 | -0.57356400 |
| C | -4.80435000 | 0.30707300  | 1.81498600  |
| H | -2.81283200 | 0.28751900  | 2.63549100  |
| C | -4.98675400 | -0.27904300 | -0.51363400 |
| H | -3.14067800 | -0.72738500 | -1.51737900 |
| C | -5.58870300 | 0.10462900  | 0.68262100  |
| H | -5.26466100 | 0.61736900  | 2.74800200  |
| H | -5.58747500 | -0.41697100 | -1.40747600 |
| H | -6.66274000 | 0.25622200  | 0.72810600  |
| H | 1.91383900  | -3.23606200 | 0.32584400  |
| H | 1.37841100  | -4.50262400 | -1.64491300 |
| H | -0.46290700 | -4.34630000 | 0.10204900  |
| H | -1.59819200 | -2.28728100 | -1.84355300 |
| C | -0.74666500 | 1.16843700  | -1.17304600 |
| C | -1.78403600 | 2.20607700  | -1.42086100 |
| C | 0.46825300  | 1.33278800  | -1.02585600 |
| C | -0.97273300 | 3.48891700  | -1.77213900 |
| H | -2.37393800 | 2.34814400  | -0.50558700 |
| H | -2.49131100 | 1.95972000  | -2.22007000 |
| C | 1.32651100  | 2.53938300  | -1.01753000 |
| C | 0.27830300  | 3.68910000  | -0.89640300 |
| H | -1.62651100 | 4.36393300  | -1.67835500 |
| H | -0.66594900 | 3.42704600  | -2.82394300 |
| H | 2.02385400  | 2.56539100  | -0.17322100 |
| H | 1.91241400  | 2.61947600  | -1.94052900 |
| H | 0.75558300  | 4.64206500  | -1.15205800 |
| H | -0.02508100 | 3.74462700  | 0.15631100  |

Electronic energy (M06-2X/6-311+G(d,p)/SMD(MeCN)) = -1194.7051 Hartrees

Zero-point correction = 0.464217 Hartrees

Thermal correction to enthalpy = 0.489378 Hartrees

Thermal correction to Gibbs free energy = 0.409835 Hartrees

Quasiharmonic free energy correction = 0.41457021 Hartrees

## References

- [1] A.S. Devlin, J. Du Bois, *Chem. Sci.* **2013**, *4*, 1059–1063.
- [2] N. Pavliček, B. Schuler, S. Collazos, N. Moll, D. Pérez, E. Guitián, G. Meyer, D. Peña, L. Gross, *Nature Chemistry* **2015**, *7*, 623–628.
- [3] T. K. Shah, J. M. Medina, N. K. Garg, *J. Am. Chem. Soc.* **2016**, *138*, 4948–4954.
- [4] T. Meguro, S. Chen, K. Kanemoto, S. Yoshida, T. Hosoya, *Chem. Lett.* **2019**, *48*, 582–585.
- [5] B. Han, P. Ma, X. Cong, H. Chen, X. Zeng, *J. Am. Chem. Soc.* **2019**, *141*, 9018–9026.
- [6] M. M. Yamano, A. V. Kelleghan, Q. Shao, M. Giroud, B. J. Simmons, B. Li, S. Chen, K. N. Houk, N. K. Garg, *Nature* **2020**, *586*, 242–247.
- [7] E. R. Darzi, J. S. Barber, N. K. Garg, *Angew. Chem., Int. Ed.* **2019**, *58*, 9419–9424.; *Angew. Chem.* **2019**, *131*, 9519–9524.
- [8] Y. Zhao, D. G. Truhlar, *Theor. Chem. Acc.* **2008**, *120*, 215–241.
- [9] R. F. Ribeiro, A. V. Marenich, C. J. Cramer, D. G. Truhlar, *J. Phys. Chem. B* **2011**, *115*, 14556.
- [10] A. V. Marenich, C. J. Cramer, D. G. Truhlar, *J. Phys. Chem. B* **2009**, *113*, 6378–6396.
- [11] C. Y. Legault, CYLView, 1.0b; Université de Sherbrooke: Quebec, Montreal, Canada, <http://www.cylview.org> (2009).
